# Supplementary material for: Self-Assembled Liposomes Enhance Electron Transfer for Efficient Photocatalytic CO2 Reduction
Source: PubMed Central journal article supplement (PMC9164230; doi:10.1021/jacs.2c01725), 2022-05-20
Supplement: ja2c01725_si_001.pdf [file ja2c01725_si_001.pdf]

# Supporting information

## Self-Assembled Liposomes Enhance Electron Transfer for Efficient Photocatalytic CO<sub>2</sub> Reduction

*Santiago Rodríguez-Jiménez,<sup>1#</sup> Hongwei Song,<sup>2#</sup> Erwin Lam,<sup>1</sup> Demelza Wright,<sup>3</sup> Andrea Pannwitz,<sup>4,5</sup> Shannon A. Bonke,<sup>1</sup> Jeremy J. Baumberg,<sup>3</sup> Sylvestre Bonnet,<sup>4</sup> Leif Hammarström,<sup>2\*</sup> Erwin Reisner<sup>1\*</sup>*

<sup>1</sup> Yusuf Hamied Department of Chemistry, University of Cambridge, Lensfield Road, Cambridge CB2 1EW, UK.

<sup>2</sup> Department of Chemistry – Angstrom Laboratory, Uppsala University, Box 523, 751 20 Uppsala, Sweden.

<sup>3</sup> Nanophotonics Centre, Department of Physics, Cavendish Laboratory, University of Cambridge, Cambridge CB3 0HE, UK.

<sup>4</sup> Leiden Institute of Chemistry, Leiden University, Einsteinweg 55, 2333 CC, Leiden, The Netherlands.

<sup>5</sup> Institute of Inorganic Chemistry I, Ulm University, Albert-Einstein-Allee 11, 89081 Ulm, Germany.

#Equal contribution.

Corresponding author email address:

Erwin Reisner: reisner@ch.cam.ac.uk

Leif Hammarström: leif.hammarstrom@kemi.uu.se

## Table of Contents

|                                                                                                                  |    |
|------------------------------------------------------------------------------------------------------------------|----|
| Synthetic methods .....                                                                                          | 3  |
| Synthesis of terpyridine-based ligand and catalysts .....                                                        | 3  |
| Synthesis of porphyrin-based ligand and catalysts .....                                                          | 5  |
| Synthesis of alkylated bipyridine ligand and ruthenium photosensitizer .....                                     | 8  |
| Sample preparation.....                                                                                          | 10 |
| Supplementary notes .....                                                                                        | 11 |
| Supplementary tables .....                                                                                       | 16 |
| Summary of electrochemical data of all catalysts in organic media.....                                           | 16 |
| Summary of dynamic light scattering results.....                                                                 | 19 |
| Tabulated photocatalysis results .....                                                                           | 21 |
| Tabulated information from photoinduced charge-transfer dynamics investigations .....                            | 27 |
| Electrochemistry results of electrode-immobilized catalysts in aqueous conditions .....                          | 28 |
| Summary of experimental and calculated resonance Raman data .....                                                | 29 |
| Tabulated Gibbs free energy of all calculated species.....                                                       | 31 |
| Supplementary Schemes.....                                                                                       | 37 |
| Preparation of liposomes.....                                                                                    | 37 |
| Synthesis of ligands, catalysts and photosensitizer .....                                                        | 37 |
| Summary of atom labeling for Raman assignments of the cobalt porphyrin.....                                      | 39 |
| Supplementary Figures.....                                                                                       | 40 |
| NMR spectroscopy of prepared ligands and RuPS <sub>L</sub> .....                                                 | 40 |
| Absorption spectroscopy of molecular species .....                                                               | 44 |
| Electrochemistry measurements of molecular catalysts in DMF .....                                                | 47 |
| Cryogenic transmission electron microscopy .....                                                                 | 53 |
| Summary of photocatalytic performance of alkylated catalysts in liposomes .....                                  | 54 |
| Isotopic labeling control experiment .....                                                                       | 58 |
| UV-vis spectra of before and after light irradiation of molecule containing DMPC liposomes .....                 | 59 |
| Reductive quenching studies .....                                                                                | 60 |
| Self-quenching studies .....                                                                                     | 62 |
| Charge separation quantum yields in homogeneous and liposome systems .....                                       | 63 |
| Monitoring the generation of RuPS <sup>-</sup> in homogeneous and charge separation lifetimes in liposomes ..... | 64 |
| Kinetic studies between RuPS <sup>-</sup> and catalysts in homogeneous and liposomes.....                        | 65 |
| Square wave voltammetry and chronoamperometry .....                                                              | 71 |
| UV-vis-NIR spectroelectrochemistry .....                                                                         | 72 |
| Resonance Raman spectroelectrochemistry .....                                                                    | 73 |
| DFT calculated Raman spectra.....                                                                                | 75 |
| Calculated structures of proposed reaction intermediates using model catalyst CoP .....                          | 79 |
| References.....                                                                                                  | 83 |

## Synthetic methods

### Synthesis of terpyridine-based ligand and catalysts

**Synthesis of T<sub>L</sub>.** This synthesis protocol was adapted from ref.<sup>1</sup> To a stirring dry dimethylformamide solution (12 mL) of 4'-hydroxy-2,2':6',2''-terpyridine (T<sub>OH</sub>, 329 mg, 1.32 mmol) under N<sub>2</sub> atmosphere, 1-bromohexadecane (0.45 mL, 1.47 mmol) was added. After 5 minutes of stirring, K<sub>2</sub>CO<sub>3</sub> (372 mg, 2.69 mmol) was added under N<sub>2</sub> to the brown solution and the resulting suspension was heated at 80 °C for 8 h under a N<sub>2</sub> atmosphere. Then after cooling the suspension to room temperature, CHCl<sub>3</sub> (20 mL) was added and was washed with water (10 mL) and the organic phase was dried over MgSO<sub>4</sub> and taken to dryness. The resulting yellowish solid was recrystallized in acetonitrile and upon cooling a fluffy solid formed, which was filtered and washed with water and dried in vacuo to give a fluffy off-white crystalline solid (490 mg, 77 %). **EA results:** Calcd. for C<sub>31</sub>H<sub>43</sub>N<sub>3</sub>O (*M* = 473.34 g·mol<sup>-1</sup>): C 78.60, H 9.15, N 8.87 %. Found: C 78.28, H 9.12, N 8.83 %. **<sup>1</sup>H NMR (CDCl<sub>3</sub>, 400 MHz):** δ (ppm) = 8.70-8.68 (ddd, 2H<sub>a</sub>), 8.63-8.61 (dd, 2H<sub>d</sub>), 8.01 (s, 2H<sub>e</sub>), 7.87-7.82 (td, 2H<sub>c</sub>), 7.34-7.31 (ddd, 2H<sub>b</sub>), 4.24-4.21 (t, 2H<sub>f</sub>), 1.89-1.82 (q, 2H<sub>g</sub>), 1.53-1.46 (q, 2H<sub>h</sub>), 1.39-1.34 (m, 2H<sub>i</sub>), 1.32-1.22 (m, 22H<sub>j</sub>), 0.89-0.86 (t, 3H<sub>k</sub>). **<sup>13</sup>C NMR (CDCl<sub>3</sub>, 100 MHz):** δ (ppm) = 167.54, 157.18, 156.40, 149.16, 136.89, 123.88, 121.49, 107.58, 68.39, 32.07, 29.84, 29.74, 29.72, 29.50, 29.47, 29.20, 26.11, 22.83, 14.25. **ESI-MS (+, methanol):** *m/z* calcd. for C<sub>31</sub>H<sub>44</sub>N<sub>3</sub>O<sup>+</sup> (i.e. MH<sup>+</sup>) 474.3484, found 474.3483. **UV-vis (CHCl<sub>3</sub>):** λ<sub>max</sub> (nm) = 280. **ATR-FTIR:** ν (cm<sup>-1</sup>) = 2943, 2915, 2871, 2847, 1581, 1563, 1469, 1443, 1402, 1359, 1200, 1026, 796, 720.

**Synthesis of CoT<sub>L</sub>.** This synthesis protocol was adapted from ref.<sup>2</sup> 4'-Hexadecyloxy-2,2':6',2''-terpyridine (T<sub>L</sub>, 100 mg, 212 μmol) and [Co<sup>II</sup>(H<sub>2</sub>O)<sub>6</sub>](BF<sub>4</sub>)<sub>2</sub> (35 mg, 103 μmol) were stirred for two hours in 1:1 methanol:CHCl<sub>3</sub> (5 mL) at room temperature and under N<sub>2</sub> atmosphere to give a dark red solution. Subsequently, the solution was evaporated to dryness, and the solid was suspended in hexane (2 mL), sonicated for 15 min, then it was filtered off and washed with hexane and dried under vacuum to yield a deep red powder (80 mg, 75 %). **EA results:** Calcd. for C<sub>62</sub>H<sub>86</sub>N<sub>6</sub>O<sub>2</sub>B<sub>2</sub>F<sub>8</sub>Co (*M* = 1179.95 g·mol<sup>-1</sup>): C 63.11, H 7.35, N 7.12 %.

Found: C 62.82, H 7.52, N 7.14 %. **ESI-MS (+, methanol):**  $m/z$  calcd. for  $C_{62}H_{86}N_6O_2Co^{2+}$  (i.e.  $M^{2+}$ ) 502.8067, found 502.8051;  $C_{62}H_{86}N_6O_2BF_4Co^+$  (i.e.  $[M^{2+} + BF_4^-]^+$ ) 1092.6173, found 1092.6053. **UV-vis (methanol):**  $\lambda_{max}$  (nm) ( $\epsilon$ ,  $M^{-1}\cdot cm^{-1}$ ) = 308 ( $20.3 \times 10^3$ ), 360 ( $2.0 \times 10^3$ ), 450 ( $7.3 \times 10^2$ ), 500 ( $5.4 \times 10^2$ ). **ATR-FTIR:**  $\nu$  ( $cm^{-1}$ ) = 3093, 2922, 2849, 1616, 1557, 1470, 1441, 1366, 1223, 1030, 793.

**Synthesis of NiTL.** This catalyst was synthesized analogously to **CoTL**,<sup>2</sup> but replacing  $[Co^{II}(H_2O)_6](BF_4)_2$  with  $[Ni^{II}(H_2O)_6](BF_4)_2$ . Pale brown-pink crystalline powder (101 mg, 41 %).

**EA results:** Calcd. for  $C_{62}H_{86}N_6O_2B_2F_8Ni$  ( $M = 1183.74$  g·mol<sup>-1</sup>): C 62.91, H 7.66, N 7.10 %. Found: C 62.98, H 7.38, N 7.17 %. **ESI-MS (+, methanol):**  $m/z$  calcd. for  $C_{62}H_{86}N_6O_2BF_4Ni^+$  (i.e.  $[M^{2+} - BF_4^-]^+$ ) 1091.6195, found 1091.6246. **UV-vis (methanol):**  $\lambda_{max}$  (nm) ( $\epsilon$ ,  $M^{-1}\cdot cm^{-1}$ ) = 300 ( $20.3 \times 10^3$ ), 312 ( $19.2 \times 10^3$ ), 325 ( $15.6 \times 10^3$ ). **ATR-FTIR:**  $\nu$  ( $cm^{-1}$ ) = 3096, 2920, 2849, 1604, 1562, 1470, 1438, 1368, 1224, 1033, 793.

**Synthesis of FeTL.** This catalyst was synthesized analogously to **CoTL**,<sup>2</sup> but replacing  $[Co^{II}(H_2O)_6](BF_4)_2$  with  $[Fe^{II}(H_2O)_6](BF_4)_2$ . Dark fuchsia powder (16 mg, 24 %). **EA results:**

Calcd. for  $C_{62}H_{86}N_6O_2B_2F_8Fe\cdot 0.5H_2O$  ( $M = 1185.87$  g·mol<sup>-1</sup>): C 62.80, H 7.39, N 7.09 %. Found: C 62.54, H 7.14, N 7.13 %. **ESI-MS (+, methanol):**  $m/z$  calcd. for  $C_{62}H_{86}N_6O_2Fe^{2+}$  (i.e.  $M^{2+}$ ) 501.3075, found 501.3091. **UV-vis (methanol):**  $\lambda_{max}$  (nm) ( $\epsilon$ ,  $M^{-1}\cdot cm^{-1}$ ) = 316 ( $22.5 \times 10^3$ ), 363 ( $2.9 \times 10^3$ ), 514 ( $5.0 \times 10^3$ ), 556 ( $7.0 \times 10^3$ ). **ATR-FTIR:**  $\nu$  ( $cm^{-1}$ ) = 3092, 2920, 2848, 1615, 1469, 1426, 1393, 1363, 1216, 1057, 789.

**Synthesis of CoTW.** This synthesis protocol was adapted from ref.<sup>3</sup> This cobalt catalyst was synthesized in a similar manner to **NiTW** but replacing anhydrous  $NiCl_2$  with anhydrous  $CoCl_2$ .

Deep red crystalline powder (15.0 mg, 10 %). **EA results:** Calcd. for  $C_{30}H_{22}N_6Cl_2Co\cdot 3.55H_2O$  ( $M = 660.34$  g·mol<sup>-1</sup>): C 54.57, H 4.44, N 12.73 %. Found: C 54.14, H 4.09, N 12.33 %. **ESI-MS (+, methanol):**  $m/z$  calcd. for  $C_{30}H_{22}N_6ClCo^+$  (i.e.  $[M^{2+} + Cl^-]^+$ ) 560.0969, found 560.0926. **UV-vis (methanol):**  $\lambda_{max}$  (nm) ( $\epsilon$ ,  $M^{-1}\cdot cm^{-1}$ ) = 318 ( $20.0 \times 10^3$ ), 444 ( $8.3 \times 10^2$ ), 505 ( $6.7 \times 10^2$ ), 551 ( $2.3 \times 10^2$ ). **ATR-FTIR:**  $\nu$  ( $cm^{-1}$ ) = 3058, 1597, 1560, 1470, 1448, 1400, 1246, 1160, 1015, 769.

**Synthesis of NiT<sub>w</sub>.** The synthesis protocol was adapted from ref.<sup>3</sup> 2,2':6',2''-terpyridine (**T**, 124 mg, 530 μmol) and NiCl<sub>2</sub> (33 mg, 250 μmol) were dissolved in methanol:CHCl<sub>3</sub> (1:1, 10 mL) producing a pale brown-salmon solution that stirred for 2 h at room temperature. Subsequently, the volume was reduced to one third and left overnight in the freezer forming a precipitate that was filtered, washed with cold methanol, and dried under vacuum to yield a pale salmon powder (80 mg, 69 %). **EA results:** Calcd. for C<sub>30</sub>H<sub>22</sub>N<sub>6</sub>NiCl<sub>2</sub>·4H<sub>2</sub>O (*M* = 668.22 g·mol<sup>-1</sup>): C 53.92, H 4.53, N 12.58 %. Found: C 53.65, H 4.16, N 12.35 %. **ESI-MS (+, methanol):** *m/z* calcd. for C<sub>30</sub>H<sub>22</sub>N<sub>6</sub>ClNi<sup>+</sup> (i.e. [M<sup>2+</sup>+Cl<sup>-</sup>]<sup>+</sup>) 559.0948, found 559.0955. **UV-vis (methanol):** λ<sub>max</sub> (nm) (ε, M<sup>-1</sup>·cm<sup>-1</sup>) = 310 (15.3 × 10<sup>3</sup>), 321 (23.5 × 10<sup>3</sup>), 336 (23.9 × 10<sup>3</sup>). **ATR-FTIR:** ν (cm<sup>-1</sup>) = 3017, 1600, 1574, 1472, 1448, 1320, 1251, 1220, 1168, 1015, 778.

**Synthesis of FeT<sub>w</sub>.** This iron catalyst was synthesized in a similar manner to NiT<sub>w</sub> but replacing anhydrous NiCl<sub>2</sub> with FeCl<sub>2</sub>.<sup>3</sup> Deep fuchsia powder (52 mg, 38 %). **EA results:** Calcd. for C<sub>30</sub>H<sub>22</sub>N<sub>6</sub>FeCl<sub>2</sub>·2H<sub>2</sub>O·0.5CH<sub>3</sub>OH (*M* = 645.35 g·mol<sup>-1</sup>): C 56.77, H 4.37, N 13.02 %. Found: C 56.67, H 4.05, N 12.70 %. **ESI-MS (+, methanol):** *m/z* calcd. for C<sub>30</sub>H<sub>22</sub>N<sub>6</sub>Fe<sup>2+</sup> (i.e. M<sup>2+</sup>) 261.0622, found 261.0633. **UV-vis (methanol):** λ<sub>max</sub> (nm) (ε, M<sup>-1</sup>·cm<sup>-1</sup>) = 320 (54.3 × 10<sup>3</sup>), 363 (4.4 × 10<sup>3</sup>), 484 (5.6 × 10<sup>3</sup>), 551 (12.2 × 10<sup>3</sup>), 607 (2.3 × 10<sup>3</sup>). **ATR-FTIR:** ν (cm<sup>-1</sup>) = 3034, 1603, 1447, 1397, 1284, 1245, 1160, 1031, 776.

### Synthesis of porphyrin-based ligand and catalysts

**Synthesis of P<sub>L</sub>.** To a stirring dry dimethylformamide solution (15 mL) of 5,10,15,20-(tetra-4-pyridyl)porphyrin (**P**, 300 mg, 485 μmol) under N<sub>2</sub> atmosphere, 1-bromohexadecane (1.5 mL, 4.9 mmol) was added, and the solution was refluxed at 130 °C for 12 h. Then after cooling to room temperature the solution was taken to dryness and the residue was taken up in a CHCl<sub>3</sub>:methanol (85:15, 10 mL) solution, followed by the addition of acetone (200 mL) resulting in the formation of a dark precipitate that was filtered off, washed with acetone (2 × 25 mL) and air dried for 12 h. The isolated solid was recrystallized in ethanol (200 mL) using 21 mL of ethanol per each 92 mg of solid, and the solution was kept in the freezer for 12 h, and the resulting dark precipitate was filtered and washed with ethanol (2 × 20 mL) and diethyl

ether (2 x 20 mL) and dried in vacuo to give a dark brown solid (609 mg, 66 %). **EA results:** Calcd. for  $C_{104}H_{158}N_8Br_4 \cdot 3H_2O$  ( $M = 1894.11 \text{ g}\cdot\text{mol}^{-1}$ ): C 65.95, H 8.73, N 5.92 %. Found: C 65.65, H 8.64, N 6.05 %.  **$^1H$  NMR (DMSO- $d_6$ , 400 MHz):**  $\delta$  (ppm) = 9.59-9.57 (d, 8H<sub>d</sub>), 9.23 (s, 8H<sub>b</sub>), 9.03-9.01 (d, 8H<sub>c</sub>), 4.98-4.94 (t, 8H<sub>e</sub>), 2.32-2.24 (q, 8H<sub>i</sub>), 1.64-1.57 (q, 8 H<sub>g</sub>), 1.53-1.47 (q, 8H<sub>h</sub>), 1.44-1.18 (m, 88 H<sub>i</sub>), 0.86-0.82 (t, 12 H<sub>j</sub>), -3.09 (s, 2 H<sub>a</sub>).  **$^{13}C$  NMR (DMSO- $d_6$ , 100 MHz):**  $\delta$  (ppm) = 156.46, 154.30, 153.39, 143.49, 132.56, 126.45, 122.89, 115.92, 114.59, 114.37, 110.68, 60.93, 31.33, 31.12, 29.17, 29.16, 29.12, 29.05, 29.02, 28.77, 28.75, 25.83, 22.13, 14.00. **ESI-MS (+, DMSO):** m/z calcd. For  $C_{104}H_{158}N_8Br_3^+$  (i.e.  $[M^{4+} + 3 \times Br^-]^+$ ) 1755.9977, found 1756.0613;  $C_{104}H_{158}N_8Br_2^{2+}$  (i.e.  $[M^{4+} + 2 \times Br^-]^{2+}$ ) 838.5394, found 838.5403. **UV-vis (methanol):**  $\lambda_{\text{max}}$  (nm) = 426, 516, 550, 592, 650. **ATR-FTIR:**  $\nu$  ( $\text{cm}^{-1}$ ) = 3399 (broad), 3029, 2918, 2849, 1635, 1560, 1508, 1452, 1169, 969, 816, 720.

**Synthesis of CoPL.** 5,10,15,20-(tetra-N-hexadecyl-4-pyridyl)porphyrin tetrabromide (PL, 57 mg, 30  $\mu\text{mol}$ ) and  $[Co^{II}(OAc)_2] \cdot 4H_2O$  (69 mg, 277  $\mu\text{mol}$ ) heated in dry dimethylformamide (5 mL) at 130 °C for 3 h. The solution was cooled to room temperature and poured into diethyl ether (100 mL) forming a brown precipitate that was filtered off, washed with diethyl ether (2 x 25 mL) and dried in vacuo for 2 hours. The solid was dissolved in an acetone:methanol (90:10, 10 mL) solution and an aqueous saturated  $NaPF_6$  solution (4 mL) was added under stirring causing the precipitation of a dark brown solid that was filtered and washed with water (5 x 10 mL) and diethyl ether (2 x 10 mL). Subsequently, this solid was re-dissolved in acetone (3 mL) and precipitated again with water (10 mL), filtered, washed with water (2 x 10 mL) and dried at room temperature in vacuo for 12 h to yield a dark brown solid (37 mg, 57 %). **EA results:** Calcd. for  $C_{104}H_{156}N_8P_4F_{24}Co \cdot 3H_2O$  ( $M = 2211.27 \text{ g}\cdot\text{mol}^{-1}$ ): C 56.49, H 7.38, N 5.07 %. Found: C 56.18, H 7.32, N 5.26 %. **ESI-MS (+, methanol):** m/z calcd. for  $C_{104}H_{156}N_8P_3F_{18}Co^+$  (i.e.  $[M^{4+} + 3 \times PF_6^-]$ ) 2011.0710, found 2011.0836;  $C_{104}H_{156}N_8Co^{4+}$  (i.e.  $M^{4+}$ ) 394.2949, found 394.2888. **UV-vis (acetone):**  $\lambda_{\text{max}}$  (nm) ( $\epsilon$ ,  $M^{-1}\cdot\text{cm}^{-1}$ ) = 426 ( $10.7 \times 10^4$ ), 455 ( $6.8 \times 10^4$ ), 530 ( $2.0 \times 10^4$ ), 676 ( $0.6 \times 10^4$ ). **ATR-FTIR:**  $\nu$  ( $\text{cm}^{-1}$ ) = 3663, 3134, 2922, 2852, 1637, 1553, 1458, 1356, 1170, 1003, 829, 717, 556.

**Synthesis of NiP<sub>L</sub>.** This catalyst was synthesized analogously to **CoP<sub>L</sub>** but replacing [Co<sup>II</sup>(OAc)<sub>2</sub>].4H<sub>2</sub>O with [Ni<sup>II</sup>(OAc)<sub>2</sub>].4H<sub>2</sub>O. Red brown powder (97 mg, 71 %). **EA results:** Calcd. for C<sub>104</sub>H<sub>156</sub>N<sub>8</sub>P<sub>4</sub>F<sub>24</sub>Ni (*M* = 2157.00 g·mol<sup>-1</sup>): C 57.91, H 7.29, N 5.19 %. Found: C 57.95, H 7.15, N 5.08 %. **ESI-MS (+, acetone):** m/z calcd. for C<sub>104</sub>H<sub>156</sub>N<sub>8</sub>P<sub>3</sub>F<sub>18</sub>Ni<sup>+</sup> (i.e. [M<sup>4+</sup> + 3 x PF<sub>6</sub><sup>-</sup>]<sup>+</sup>) 2010.0732, found 2010.0857; C<sub>104</sub>H<sub>156</sub>N<sub>8</sub>P<sub>2</sub>F<sub>12</sub>Ni<sup>2+</sup> (i.e. [M<sup>4+</sup> + 2 x PF<sub>6</sub><sup>-</sup>]<sup>2+</sup>) 933.0556, found 933.0320; C<sub>104</sub>H<sub>156</sub>N<sub>8</sub>Ni<sup>4+</sup> (i.e. M<sup>4+</sup>) 394.0455, found 394.0375. **UV-vis (acetone):** λ<sub>max</sub> (nm) (ε, M<sup>-1</sup>·cm<sup>-1</sup>) = 420 (10.8 x 10<sup>4</sup>), 531 (9.9 x 10<sup>3</sup>), 562 (4.8 x 10<sup>3</sup>). **ATR-FTIR:** ν (cm<sup>-1</sup>) = 3666, 3135, 2923, 2852, 1638, 1560, 1513, 1458, 1356, 1170, 1005, 830, 716, 555.

**Synthesis of FeP<sub>L</sub>.** This catalyst was synthesized analogously to **CoP<sub>L</sub>** but replacing [Co<sup>II</sup>(OAc)<sub>2</sub>].4H<sub>2</sub>O with FeCl<sub>2</sub> and sodium acetate (1 eq. Fe : 2 eq. acetate). Greenish brown powder (88 mg, 64 %). **EA results:** Calcd. for C<sub>104</sub>H<sub>156</sub>N<sub>8</sub>P<sub>4</sub>F<sub>24</sub>FeCl·3H<sub>2</sub>O (*M* = 2128.05 g·mol<sup>-1</sup>): C 55.67, H 7.28, N 4.99%. Found: C 55.49, H 6.90, N 5.04%. **ESI-MS (+, acetone):** m/z calcd. for C<sub>104</sub>H<sub>156</sub>N<sub>8</sub>P<sub>2</sub>F<sub>12</sub>FeCl<sup>2+</sup> (i.e. [M + 2 x PF<sub>6</sub><sup>-</sup>]<sup>2+</sup>) 949.5399, found 949.5533. **UV-vis (acetone):** λ<sub>max</sub> (nm) (ε, M<sup>-1</sup>·cm<sup>-1</sup>) = 418 (6.7 x 10<sup>4</sup>), 458 (3.6 x 10<sup>4</sup>), 571 (9.2 x 10<sup>3</sup>), 622 (3.6 x 10<sup>3</sup>). **ATR-FTIR:** ν (cm<sup>-1</sup>) = 3657, 3136, 2922, 2852, 1637, 1527, 1458, 1377, 1169, 1085, 1022, 830, 720, 556.

**Synthesis of CoP<sub>W</sub>.** The synthesis was carried out following reported protocol from ref <sup>4</sup> and the physicochemical characterisation of **CoP<sub>W</sub>** matches that reported in the same ref. Dark brown powder (36 mg, 50 %). **EA results:** Calcd. for C<sub>44</sub>H<sub>36</sub>N<sub>8</sub>P<sub>4</sub>F<sub>24</sub>Co·2.5H<sub>2</sub>O (*M* = 1360.65 g·mol<sup>-1</sup>): C 38.84, H 3.04, N 8.24 %. Found: C 38.39, H 2.57, N 8.09 %. **ESI-MS (+,acetone):** m/z calcd. for C<sub>44</sub>H<sub>36</sub>N<sub>8</sub>P<sub>3</sub>F<sub>18</sub>Co<sup>+</sup> (i.e. [M<sup>4+</sup> + 3 x PF<sub>6</sub><sup>-</sup>]<sup>+</sup>) 1170.1320, found 1170.1243; C<sub>44</sub>H<sub>36</sub>N<sub>8</sub>P<sub>2</sub>F<sub>12</sub>Co<sup>2+</sup> (i.e. [M<sup>4+</sup> + 2 x PF<sub>6</sub><sup>-</sup>]<sup>2+</sup>) 512.5834, found 512.5787. **UV-vis (acetone):** λ<sub>max</sub> (nm) (ε, M<sup>-1</sup>·cm<sup>-1</sup>) = 423 (10.5 x 10<sup>4</sup>), 490 (1.3 x 10<sup>4</sup>), 531 (1.2 x 10<sup>4</sup>), 664 (2.0 x 10<sup>3</sup>); **UV-vis (Milli-Q water):** λ<sub>max</sub> (nm) (ε, M<sup>-1</sup>·cm<sup>-1</sup>) = 437 (10.3 x 10<sup>4</sup>), 550 (9.5 x 10<sup>3</sup>), 590 (3.3 x 10<sup>3</sup>); **ATR-FTIR:** ν (cm<sup>-1</sup>) = 3655, 3138, 3063, 1641, 1556, 1516, 1465, 1355, 1278, 1190, 1088, 1002, 826, 716, 555.

**Synthesis of NiP<sub>w</sub>.** This catalyst was prepared by anion exchange of the commercial chloride-containing analogue. The method followed is analogous to that described for **CoP<sub>w</sub>**. Reddish brown powder (20 mg, 76 %). **EA results:** Calcd. for C<sub>44</sub>H<sub>36</sub>N<sub>8</sub>P<sub>4</sub>F<sub>24</sub>Ni·2.4H<sub>2</sub>O (*M* = 1358.63 g·mol<sup>-1</sup>): C 38.90, H 3.03, N 8.25 %. Found: C 39.03, H 2.72, N 7.94 %. **ESI-MS (+, acetone):** *m/z* calcd. for C<sub>44</sub>H<sub>36</sub>N<sub>8</sub>P<sub>3</sub>F<sub>18</sub>Ni<sup>+</sup> (i.e. [M<sup>4+</sup> + 3 x PF<sub>6</sub><sup>-</sup>]) 1169.1342, found 1169.1393. **UV-vis (acetone):** λ<sub>max</sub> (nm) (ε, M<sup>-1</sup>·cm<sup>-1</sup>) = 423 (10.0 x 10<sup>4</sup>), 516 (8.9 x 10<sup>3</sup>), 551 (4.2 x 10<sup>3</sup>), 590 (4.0 x 10<sup>3</sup>). **ATR-FTIR:** ν (cm<sup>-1</sup>) = 3668, 3135, 1641, 1574, 1513, 1460, 1403, 1278, 1186, 974, 829, 733, 555.

**Synthesis of FeP<sub>w</sub>.** This catalyst was prepared by anion exchange of the commercial chloride-containing analogue. The method followed is analogous to that described for **CoP<sub>w</sub>**. Greenish brown powder (15 mg, 80 %). **EA results:** Calcd. for C<sub>44</sub>H<sub>36</sub>N<sub>8</sub>P<sub>4</sub>F<sub>24</sub>FeCl·6.7H<sub>2</sub>O·3NaPF<sub>6</sub> (*M* = 1972.54 g·mol<sup>-1</sup>): C 26.79, H 2.52, N 5.68%. Found: C 27.13, H 2.45, N 5.48 %. **ESI-MS (+, acetone):** *m/z* calcd. for C<sub>44</sub>H<sub>36</sub>N<sub>8</sub>P<sub>2</sub>F<sub>12</sub>FeCl<sup>2+</sup> [M+2 x PF<sub>6</sub><sup>-</sup> + Cl]<sup>2+</sup> 528.5687, found 528.5686. **UV-vis (acetone):** λ<sub>max</sub> (nm) (ε, M<sup>-1</sup>·cm<sup>-1</sup>) = 415 (13.5 x 10<sup>4</sup>), 458 (5.0 x 10<sup>4</sup>), 570 (1.5 x 10<sup>4</sup>), 625 (5.5 x 10<sup>3</sup>). **ATR-FTIR:** ν (cm<sup>-1</sup>) = 3653, 3137, 1642, 1529, 1463, 1276, 1191, 1089, 1005, 828, 719, 555.

### **Synthesis of alkylated bipyridine ligand and ruthenium photosensitizer**

**Synthesis of Bpy<sub>L</sub>.** The synthesis was carried out following reported protocol from ref <sup>5</sup> and the physicochemical characterisation matches that reported in the same ref. To diisopropylamine (4.10 mL, 2.94 g, 29.00 mmol) in dry THF at 0 °C was added *n*-BuLi in hexane (2.5 M, 11.60 mL, 29.00 mmol). This mixture was stirred at 0 °C for 1 h. At 0 °C 4,4'-dimethyl-2,2'-bipyridine (2.00 g, 10.86 mmol) in dry THF was added via a syringe and stirring at 0 °C was continued for 3 h before adding hexadecyl bromide (8.80 g, 29.0 mmol) in dry THF at 0 °C. The mixture was stirred at room temperature for 3 days. The reaction mixture was poured onto water with ice (200 mL). The aqueous phase was extracted with diethyl ether (1 x 500 mL). The organic solvent was removed in vacuo and the solid was recrystallized from pentane (100 mL). Filtration and drying at air yielded 4,4'-diheptadecyl-2,2'-bipyridine (**Bpy<sub>L</sub>**)



as white solid (2.20 g, 32 %). **EA results:** Calcd. for  $C_{44}H_{76}N_2$  ( $M = 633.10 \text{ g}\cdot\text{mol}^{-1}$ ): C 83.47, H 12.10, N 4.42 %, found: C 83.43, H 12.07, N 4.39 %.  **$^1\text{H NMR}$  ( $\text{CDCl}_3$ , 400 MHz):**  $\delta$  (ppm) = 8.56-8.55 (d,  $J = 5.0 \text{ Hz}$ , 2  $H_a$ ), 8.23 (d,  $J = 1.7 \text{ Hz}$ , 2  $H_c$ ), 7.13-7.12 (dd,  $J = 5.0, 1.7 \text{ Hz}$ , 2  $H_b$ ), 2.71-2.67 (t, 4  $H_d$ ), 1.72-1.65 (q,  $J = 7.4 \text{ Hz}$ , 4  $H_e$ ), 1.38-1.22 (m, 56  $H_f$ ), 0.89-0.86 (t,  $J = 6.7 \text{ Hz}$ , 6  $H_g$ ).  **$^{13}\text{C NMR}$  ( $\text{CDCl}_3$ , 100 MHz):**  $\delta$  (ppm) = 156.19, 152.92, 148.96, 123.89, 121.32, 35.55, 31.92, 30.46, 29.69, 29.65, 29.53, 29.43, 29.36, 29.33, 22.69, 14.10. **ESI-MS (+, methanol):**  $m/z$  calcd. for  $C_{44}H_{77}N_2^+$  (i.e.  $\text{MH}^+$ ) 633.6087, found: 633.6067. **UV-vis ( $\text{CHCl}_3$ ):**  $\lambda_{\text{max}}$  (nm) = 284. **ATR-FTIR:  $\nu$  ( $\text{cm}^{-1}$ )** = 3062, 2955, 2917, 2847, 1598, 1547, 1469, 1419, 1384, 1112, 993, 896, 845, 827, 719, 669, 592, 508.

**Synthesis of RuPS<sub>L</sub>.** The synthesis was carried out following reported protocol from ref <sup>5</sup> and the physicochemical characterisation matches that reported in the same ref. A mixture of  $[\text{Ru}(\text{Cl})_2(\text{bpy})_2]$  (754 mg, 1.56 mmol) and 4,4'-diheptadecyl-2,2'-bipyridine (978 mg, 1.54 mmol) in a 1:1:1 mixture of ethanol:water:chloroform (60 mL) was degassed via  $\text{N}_2$  bubbling for 15 min and then heated at 110 °C for 2 days. After cooling to room temperature the solvent mixture was removed in vacuo. The reaction residue was subjected to column chromatography (stationary phase:  $\text{SiO}_2$ ; 1<sup>st</sup> eluent: acetone, 2<sup>nd</sup> eluent: 8:4:1 acetone:water:brine, 3<sup>rd</sup> eluent: 100:10:1 acetone:water:aqueous sat.  $\text{KNO}_3$ [<sub>aq</sub>]) to isolate the red-orange fraction. The solvent was removed in vacuo and the red compound was extracted with chloroform. The combined organic layers were dried over  $\text{MgSO}_4$  and taken to dryness. The red solid was taken up in methanol and subjected to ion exchange column with Amberlite (50 g, presoaked with brine and washed 10 times with water and 3 times with methanol). The solvent was removed, and the red solid was taken up in a mixture of chloroform and 1:1 water:brine. The two phases were separated, and the aqueous phase was extracted with chloroform. The combined organic layers were dried with  $\text{MgSO}_4$  and the solvent was evaporated in vacuo. Trituration of the solid in acetone (100 mL) followed by removal of 50 mL of acetone at the rotavap, cooling to room temperature and filtration and washing with acetone (50 mL) yielded the desired compound as  $([\text{Ru}(\text{bpy})_2(\text{Bpy}_L)](\text{Cl})_2\cdot 7\text{H}_2\text{O})$  (1.10 g,

60 %). **EA results:** Calcd. for  $C_{64}H_{92}N_6RuCl_2 \cdot 7H_2O$  ( $M = 1243.56 \text{ g} \cdot \text{mol}^{-1}$ ): C 61.81, H 8.59, N 6.76 %. Found: C 61.47, H 8.27, N 6.43 %.  **$^1H$  NMR ( $CD_3OD$ , 400 MHz):**  $\delta$  (ppm) = 8.71-8.69 (d,  $J = 8.2 \text{ Hz}$ ,  $4H_{d'}$ ), 8.62 (d,  $J = 1.9 \text{ Hz}$ ,  $2H_d$ ), 8.14-8.10 (t,  $4H_{c'}$ ), 7.82-7.81 (m,  $4H_{a'}$ ), 7.64-7.62 (d,  $J = 5.8 \text{ Hz}$ ,  $2H_a$ ), 7.51-7.46 (dtd,  $J = 7.2, 5.7, 1.3 \text{ Hz}$ ,  $4H_{b'}$ ), 7.35-7.34 (dd,  $J = 5.9, 1.8 \text{ Hz}$ ,  $2H_b$ ), 2.87-2.83 (t,  $J = 7.9 \text{ Hz}$ ,  $4H_e$ ), 1.77-1.70 (q,  $J = 7.3 \text{ Hz}$ ,  $4H_f$ ), 1.40-1.25 (m,  $56H_g$ ), 0.91-0.88 (t,  $J = 6.6 \text{ Hz}$ ,  $6H_h$ ).  **$^{13}C$  NMR ( $CD_3OD$ , 100 MHz):**  $\delta$  (ppm) =  $\delta$  158.63, 158.60, 158.19, 156.56, 152.65, 152.52, 151.87, 139.01, 128.95, 128.84, 125.67, 125.49, 36.26, 33.09, 31.35, 30.80, 30.77, 30.74, 30.63, 30.49, 30.44, 30.42, 23.75, 14.47. **ESI-MS (+, methanol)**  $m/z$  calcd. for  $C_{64}H_{92}N_6ClRu^+$  (i.e.  $[M^{2+} + Cl]^+$ ): 1081.6115, found: 1081.5840. **UV-vis (methanol):**  $\lambda_{max}$  (nm) ( $\epsilon$ ,  $M^{-1} \cdot \text{cm}^{-1}$ ) = 454 ( $13.5 \times 10^3$ ). **ATR-FTIR:**  $\nu$  ( $\text{cm}^{-1}$ ) = 3381 (broad), 3068, 2955, 2920, 2851, 1615, 1463, 1422, 1313, 1244, 1160, 1123, 1026, 772, 730.

## Sample preparation

**Preparation of liposomes.** Method A was utilized to prepare DMPC/DLPC/DPPC-based liposomes (see main text). Method B was employed to prepare DMPC-based liposomes with different DMPC:**RuPS<sub>L</sub>** ratios to investigate their effect in self-quenching of membrane-bound **RuPS<sub>L</sub>** and photocatalytic  $CO_2$  reduction (see supplementary sections *photophysical dynamics investigations* and *photocatalysis experiments*, respectively).

*Method A:* Aliquots of lipid DMPC (0.25 mL of a 10 mM chloroform solution), NaDSPE-PEG2K (0.25 mL of a 0.1 mM chloroform solution), **RuPS<sub>L</sub>** (0.25 mL of a 1 mM methanol solution) and catalyst [ranging from 0.02 to 0.25 mL of 50  $\mu\text{M}$  in methanol solution (**MT<sub>L</sub>**) or 50  $\mu\text{M}$  acetone solution (**MP<sub>L</sub>**)] were added to a reaction tube (using a scale and the solvents' density for higher accuracy) and taken to dryness using a rotavapor (45 °C, 300 mm Hg) to yield a lipid film. The film was dried in vacuo for 30 min and hydrated with aqueous 0.1M  $NaHCO_3$  solution (0.5 mL). The lipid film was repeatedly freeze-thaw-sonication three times (i.e., it was frozen using liquid  $N_2$ , thawed using a water bath at 45 °C (DLPC and DMPC) and 55°C (DPPC) and

followed by sonication for 10 sec). This process resulted in a homogeneously dispersed solution that was extruded through a 0.2  $\mu\text{m}$  polycarbonate filters (19 mm) at 45 °C (DLPC and DMPC) and 55 °C (DPPC). A photocatalysis sample contains an aliquot of the liposome extruded solution (60  $\mu\text{L}$ ) diluted in an aqueous solution containing 0.1 M  $\text{NaHCO}_3$  and 0.1 M sodium ascorbate (2.94 mL) to achieve a final concentration of lipid:NaDSPE-PEG2K:**RuPS<sub>L</sub>** of 100  $\mu\text{M}$ :1  $\mu\text{M}$ :10  $\mu\text{M}$ , with a variable catalyst concentration of 500 nM, 200 nM, 50 nM and 20 nM (see DLS results in Tables S4-S6). Subsequently, this solution was purged with either  $\text{CO}_2$ : $\text{CH}_4$  or  $\text{N}_2$ : $\text{CH}_4$  (98:2) for 20 minutes before starting a light irradiation experiment.

*Method B:* This protocol differs from *Method A* in that only lipid DMPC was utilized and the volume of lipids DMPC and NaDSPE-PEG2K (10 mM and 0.1mM chloroform solution respectively) was doubled or quadrupled, and while the concentration of **RuPS<sub>L</sub>** is maintain the same as in *Method A* to have the same optical density (i.e. final concentration of **RuPS<sub>L</sub>** = 10  $\mu\text{M}$ ), to obtain a final concentration (after extrusion and dilution) of lipid:NaDSPE-PEG2K:**RuPS<sub>L</sub>** equal to 200 $\mu\text{M}$ :2 $\mu\text{M}$ :10 $\mu\text{M}$  or 400 $\mu\text{M}$ :4 $\mu\text{M}$ :10 $\mu\text{M}$ . The final concentration of catalysts was also 500, 200, 50 and 20 nM.

**Homogeneous samples.** Homogeneous control samples were prepared analogously to liposome samples from Method A, using the same concentrations for the molecular species but without any lipids. Alkylated catalysts and **RuPS<sub>L</sub>**, water-soluble catalysts **MT<sub>w</sub>** (M = Co, Fe, Ni) and **MP<sub>w</sub>** (M = Co, FeCl, Ni) and photosensitizer  $[\text{Ru}(\text{bpy})_3](\text{Cl})_2$  (**RuPS<sub>w</sub>**) were utilized instead. Furthermore, due to the lack of lipids, there was no need to conduct frozen-thawed-sonicated cycles or extrude the solution.

## Supplementary notes

**Supplementary Note 1 regarding liposome screening.** Cryo-TEM results (Figure S17) reveal that liposomes made of 100  $\mu\text{M}$  DMPC, DLPC or DPPC containing NaDSPE-PEG2K, **RuPS<sub>L</sub>** and **NiT<sub>L</sub>**, are all smoothly rounded. Pure DMPC and DPPC liposomes should give

faceted liposomes below their transition phase temperature ( $T_m$ ).<sup>6</sup> We attribute the fact that DPPC and DLPC liposomes are smooth at room temperature in the present study to the fact that they are heavily doped (i.e. contain 1% NaDSPE-PEG2K and 10% **RuPS<sub>L</sub>** and catalyst), which probably lowers their  $T_m$  compared to that of pure DMPC or DPPC liposomes.

These results can be further supported by electron transfer (ET) kinetic measurements carried out at room temperature with liposomes made of DLPC, DMPC and DPPC containing (A) 1  $\mu$ M NaDSPE-PEG2K and 10  $\mu$ M **RuPS<sub>L</sub>** or (B) 1  $\mu$ M NaDSPE-PEG2K and 10  $\mu$ M **RuPS<sub>L</sub>** and 2  $\mu$ M **NiT<sub>L</sub>** (see Figure S36). Results show a similar rate of bleaching of **RuPS<sub>L</sub><sup>-</sup>** for all three liposomes when both dye and catalyst molecules are present, with DMPC and DLPC liposomes exhibiting a slightly faster decay of **RuPS<sub>L</sub><sup>-</sup>** than DPPC liposomes. Furthermore, trends in photocatalysis results are coherent with expectations based on the aforementioned ET kinetics results (see Figure S25 and Table S13). Experiments carried out using DMPC, DLPC and DPPC liposomes with 100  $\mu$ M lipids, 1  $\mu$ M NaDSPE-PEG2K, 10  $\mu$ M **RuPS<sub>L</sub>** and 0.5  $\mu$ M **CoP<sub>L</sub>** showed that DMPC and DLPC performed within experimental error approximately the same, with DMPC yielding slightly better results, compared to DPPC liposomes.

Overall, these screening results highlight that all three liposomes were in the liquid crystal (fluid) phase at room temperature, and that DMPC was the best building block to construct our self-assembled system to study CO<sub>2</sub> reduction and light-driven ET kinetics.

**Supplementary Note 2 regarding Figure S30C and S30D.** To elucidate the non-exponential decay of **RuPS<sub>L</sub>** in DMPC liposomes, different surface concentrations of dyes were used (Figure S30C), and the lifetime increased with dilution of the dye. Excitation-pulse-energy-dependent measurements were further employed to examine the emission decays at 650 nm in liposomes with a mole ratio 10:1 between DMPC and **RuPS<sub>L</sub>** (Figure S30D). The emission decays show laser-power independent dynamics by using pump laser power at 20-50

mJ/pulse, which is different from the behaviour expected for triplet-triplet annihilation processes.<sup>7</sup> Therefore, we can ascribe the short-lifetime component in the emission decays to the self-quenching of **RuPS<sub>L</sub>** in the surface of DMPC liposomes, i.e. quenching by ground state **RuPS<sub>L</sub>** molecules. In support of this assignment, we also observe a faster decay on the blue edge of the emission band (600 nm) than near the band maximum (650 nm; Figure S30B). This is consistent with heterogeneity of dye interactions at higher surface concentrations, where high-energy sites may be quenched by energy transfer to dyes at low-energy sites. The corresponding effect is absent at the same concentration of dye in the homogeneous solution (Figure S30A). The rate constants and fitting parameters are summarized in Table S14.

**Supplementary Note 3 regarding Figure S31.** Time-resolved absorption spectroscopy can be also used to obtain light-driven charge separation yields between photosensitizer and quencher molecules. The charge separation quantum yield between photosensitizer and quencher in homogenous environment and liposomes ( $\phi_{ET}$ ) in Figure S31 was estimated as  $\phi_{ET} = [Ru(I)] / [Ru^*]$  using the difference in molar attenuation coefficients for different Ru species, i.e.  $\Delta\epsilon_{Ru^*-Ru(II)} = 1.1 \cdot 10^4 \text{ M}^{-1} \text{ s}^{-1}$  at 450 nm and  $\Delta\epsilon_{Ru(I)-Ru(II)} = 1.3 \cdot 10^4 \text{ M}^{-1} \text{ s}^{-1}$  at 510 nm. In homogenous conditions, for a solution with **[RuPS<sub>w</sub>]** = 20  $\mu\text{M}$  and 0.1 M ascorbate in 0.1 M NaHCO<sub>3</sub> buffer and concentration values of  $[Ru^*]_{t=0} = 2.4 \mu\text{M}$  and  $[Ru(I)]_{max} = 0.84 \mu\text{M}$ , the  $\phi_{ET}$  is 35 %. In liposomes, for a solution with **[DMPC]** = 100  $\mu\text{M}$ , **[NaDSPE-PEG2K]** = 1  $\mu\text{M}$ , **[RuPS<sub>L</sub>]** = 10  $\mu\text{M}$  and 0.1 M ascorbate in 0.1 M NaHCO<sub>3</sub> buffer, and values of  $[Ru^*]_{t=0} = 1.27 \mu\text{M}$  and  $[Ru(I)]_{max} = 0.07 \mu\text{M}$ , the  $\phi_{ET}$  is 6 %. This lower quantum yield value in liposomes could be explained by the coulombic association (or ion-pair formation) between the cationic photosensitizer and the anionic ascorbate in the ground state, resulting in undesirable charge recombination and lower charge separation quantum yield.

**Supplementary Note 4 regarding Figure 3D.** The rate of electron transfer reaction **RuPS<sub>w</sub><sup>-</sup>** + **NiT<sub>w</sub>**  $\rightarrow$  **RuPS<sub>w</sub>** + **NiT<sub>w</sub><sup>-</sup>** can be described as  $v = k_{et} [\text{RuPS}_w^-] [\text{NiT}_w]$ , when  $[\text{NiT}_w] \gg$

[RuPS<sub>w</sub><sup>-</sup>]. The reaction has a pseudo-first-order behavior and thus  $v = k_{obs} [\text{RuPS}_w^-]$ , i.e.  $k_{obs} = k_{et} [\text{NiT}_w]$  and hence  $k_{et}$  can be extracted from the  $k_{obs}$  vs  $[\text{NiT}_w]$  plot. The kinetic traces of 100, 200, 300  $\mu\text{M NiT}_w$  (Figure 3D) can be fitted well by using biexponential decays (see Table S14 for all time constants and corresponding amplitudes). The longer component is ascribed to the decay of reduced catalyst  $\text{NiT}_w^-$ , and is therefore not considered into the  $k_{et}$  calculation. In addition, without catalyst the reduced photosensitizer  $\text{RuPS}_w^-$  can recombine with oxidized ascorbate, hence such recombination reaction must be considered as it is in competition with an ET from  $\text{RuPS}_w^-$  to  $\text{NiT}_w$ . Therefore,  $k_{obs} = 1/\tau_1 - 1/\tau_0$ , where  $\tau_1$  is the short-lifetime components with different catalyst concentrations, and  $\tau_0$  is the recombination reaction lifetime without catalyst.

**Supplementary Note 5 regarding Table S14.** The ET rate constants in Table S14 suggest that at 100  $\mu\text{M NiT}_L$  the fast kinetic component lifetime (3.5  $\mu\text{s}$ ) is ca. five times shorter than the lifetime in the absence of catalyst (18.5  $\mu\text{s}$ ), suggesting ~80% efficiency of electron transfer to the catalyst. Similarly, for the liposomes at 5  $\mu\text{M NiT}_w$  the fast component is reduced ca. four-fold, from 28  $\mu\text{s}$  to 7.4  $\mu\text{s}$ . Also the slow component without catalyst clearly reacts and leads to a loss in long-lived amplitude, which is attributable to electron transfer to catalyst. This efficiency estimate is more uncertain than in homogeneous solution, due to the heterogeneous system giving heterogeneous kinetics. We estimate that the yield is in the range 57-82%, based on a lower limit of the amplitude of the fast phase, and an upper limit of the combined amplitudes of the first and second phases.

**Supplementary Note regarding Figure S39B.** The slightly different position of the reduction waves in GCE|CoP<sub>L</sub> (i.e. -0.30 and -0.50 V vs SHE in CO<sub>2</sub>) vs FTO|CoP<sub>L</sub> (i.e. -0.10 and -0.35 V in CO<sub>2</sub>) highlights the effect that surface choice and film self-assembly can have on the electrochemical behaviour.<sup>8</sup>

**Supplementary Note 6 regarding Figure S41.** Re-oxidation of the reduced FTO|CoP<sub>L</sub> films, by re-applying +0.7 V after the stepwise reduction, shows that under N<sub>2</sub> the absorption of the re-oxidized film remains similar to the as-prepared film (Figure S41A).<sup>9</sup> Under CO<sub>2</sub> the re-oxidized film shows a hypochromic shift of the Soret band and two new absorptions at 618 and 802 nm (Figure S41B), which can be attributed to the possible non-reversible reduction of the porphyrin ligand core to chlorin or bacteriochlorin<sup>10</sup> or the formation of the proposed catalytic intermediate [CoP<sub>L</sub>(CO)]<sup>2+</sup> species (see Figure 5). An analogous results was also observed with Resonance Raman SEC under CO<sub>2</sub> conditions (Figure S43).

**Supplementary Note 7 regarding DFT matching.** We have calculated the spectra for several species using a simplified DFT model that omits lipophilic alkyl chains of the catalyst species (Figures S49-55). This simplified model was chosen to significantly decrease the computational cost associated with screening several oxidation states and adducts.

Comparing DFT results to experimental data at +0.7 V vs SHE (where no adduct or H<sub>2</sub>O-adduct are expected) and at -0.9 V vs SHE (where H<sub>2</sub>O- and CO-adducts are expected), we found that the pyridinium modes between 1150-1250 cm<sup>-1</sup> and 1635 cm<sup>-1</sup> are reproduced. Modes in the lower wavenumber region < 900 cm<sup>-1</sup> are broad in the experimental spectra, presumably due to the disordered film structure.<sup>8</sup> The DFT correctly predicts a strong response at ≈1360 cm<sup>-1</sup> corresponding to the porphyrin core, while additional broad modes are also observed in the 1300-1350 cm<sup>-1</sup> region that are not found in the DFT or in previous work.<sup>11</sup> This spectral region hosts various alkyl chain modes such as the CH<sub>2</sub> twisting mode and CH<sub>3</sub> bend<sup>12</sup> and therefore it is likely that these modes, not included in the DFT model, are assigned here.

Having benchmarked the DFT model, we compared the calculated spectra and Gibbs free energies for several different oxidation states to assist identifying the reduced species (Figures

S45 and S46 for summary of calculated Raman spectra, and Tables 17-18 for summary of Gibbs free energies).

## Supplementary tables

### Summary of electrochemical data of all catalysts in organic media

**Table S1.** Summary of electrochemical data for all catalysts in N<sub>2</sub>- and CO<sub>2</sub>-saturated 0.2 M TBAPF<sub>6</sub> DMF solution given in V vs Fc<sup>0/+</sup> as half-wave potential with the peak separation in brackets or for irreversible waves (irr) indicating if they are oxidation (ox) and reduction (red) processes. In those cases where a peak is very similar in CO<sub>2</sub>/N<sub>2</sub> only one value is provided, unless otherwise stated within brackets.

| Catalyst    | CV                                     |                                                                                                                                                                                                                                                                                                  | SWV                                    |                                                                                                                           | Reference |
|-------------|----------------------------------------|--------------------------------------------------------------------------------------------------------------------------------------------------------------------------------------------------------------------------------------------------------------------------------------------------|----------------------------------------|---------------------------------------------------------------------------------------------------------------------------|-----------|
| <b>CoTL</b> | N <sub>2</sub>                         | -0.20 (0.08), -1.19 (0.07), -2.04 (0.08)                                                                                                                                                                                                                                                         | N <sub>2</sub>                         | -0.20, -1.19, -2.05                                                                                                       | 13        |
|             | CO <sub>2</sub>                        | -0.20 (0.08), -1.20 (0.06), -2.14 (red, irr)                                                                                                                                                                                                                                                     | CO <sub>2</sub>                        |                                                                                                                           |           |
| <b>CoTw</b> | N <sub>2</sub>                         | -0.04 (0.08), -1.06 (0.08), -1.83 (0.07)                                                                                                                                                                                                                                                         | N <sub>2</sub>                         | 0.04, -1.05, -1.84                                                                                                        | 3         |
|             | CO <sub>2</sub>                        | 0.03 (0.09), -1.08 (0.07), -1.88 (red, irr)                                                                                                                                                                                                                                                      | CO <sub>2</sub>                        |                                                                                                                           |           |
| <b>NiTL</b> | N <sub>2</sub>                         | -1.73 (0.10), -1.95 (0.14), -2.12 (0.09), -2.25 (0.07)                                                                                                                                                                                                                                           | N <sub>2</sub>                         | -1.75, -1.96, -2.13, -2.26                                                                                                | This work |
|             | CO <sub>2</sub>                        | -1.79 (red, irr), -1.96 (red, irr), -2.25 (red, irr)                                                                                                                                                                                                                                             | CO <sub>2</sub>                        | -1.75, -1.97, -2.20                                                                                                       |           |
| <b>NiTw</b> | N <sub>2</sub>                         | -1.58 (0.12), -1.90 (0.11)                                                                                                                                                                                                                                                                       | N <sub>2</sub>                         | -1.63, -1.93                                                                                                              | 3, 14     |
|             | CO <sub>2</sub>                        | -1.68 (red, irr), -1.95 (red, irr), -2.21 (red, irr)                                                                                                                                                                                                                                             | CO <sub>2</sub>                        | -1.63, -1.88, -2.16                                                                                                       |           |
| <b>FeTL</b> | N <sub>2</sub>                         | -0.17 (ox, irr), -1.75 (0.07), -1.88 (0.07)                                                                                                                                                                                                                                                      | N <sub>2</sub>                         | -1.75, -1.89                                                                                                              | This work |
|             | CO <sub>2</sub>                        | -0.16 (ox, irr), -1.20 (ox, irr), -1.75 (0.09), -1.90 (0.09), -2.01 (red, irr)                                                                                                                                                                                                                   | CO <sub>2</sub>                        |                                                                                                                           |           |
| <b>FeTw</b> | N <sub>2</sub>                         | -1.65 (0.06), -1.78 (0.06)                                                                                                                                                                                                                                                                       | N <sub>2</sub>                         | -1.65, -1.79                                                                                                              | 3         |
|             | CO <sub>2</sub>                        |                                                                                                                                                                                                                                                                                                  | CO <sub>2</sub>                        |                                                                                                                           |           |
| <b>CoPL</b> | N <sub>2</sub>                         | -0.82 (0.06), -0.99 (0.07), -1.20 (0.08), -1.38 (0.06), -1.49 (0.06)                                                                                                                                                                                                                             | N <sub>2</sub>                         | -0.81, -0.99, -1.20, -1.38, -1.48                                                                                         | This work |
|             | CO <sub>2</sub>                        |                                                                                                                                                                                                                                                                                                  | CO <sub>2</sub>                        |                                                                                                                           |           |
|             | CO <sub>2</sub> + 5 % H <sub>2</sub> O | -0.82 (0.07), -1.00 (0.09), -1.18 (0.13), -1.29 (0.13), -1.49 (red, irr)                                                                                                                                                                                                                         | CO <sub>2</sub> + 5 % H <sub>2</sub> O | -0.82, -1.0, -1.19, -1.34, -1.46                                                                                          |           |
| <b>CoPw</b> | N <sub>2</sub>                         | -0.98 (0.06), -1.23 (0.07), -1.37 (0.06), -1.46 (0.06)                                                                                                                                                                                                                                           | N <sub>2</sub>                         | -0.92, -1.23, -1.38, -1.46                                                                                                | 4, 15     |
|             | CO <sub>2</sub>                        |                                                                                                                                                                                                                                                                                                  | CO <sub>2</sub>                        |                                                                                                                           |           |
| <b>NiPL</b> | N <sub>2</sub>                         | -0.91 (in CO <sub>2</sub> , 0.13), -0.96 (in N <sub>2</sub> , 0.16), -1.11 (0.06), -1.32 (0.06), -1.47 (0.07), -1.96 (in N <sub>2</sub> , 0.11), -1.82 (in CO <sub>2</sub> , 0.18)                                                                                                               | N <sub>2</sub>                         | -1.00, -1.11, -1.32, -1.47, -1.86 (in CO <sub>2</sub> ), -1.97 (in N <sub>2</sub> )                                       | This work |
|             | CO <sub>2</sub>                        |                                                                                                                                                                                                                                                                                                  | CO <sub>2</sub>                        |                                                                                                                           |           |
| <b>NiPw</b> | N <sub>2</sub>                         | -0.98 (0.06), -1.29 (0.06), -1.42 (0.06), -1.83 (in N <sub>2</sub> , 0.18), -1.85 (in CO <sub>2</sub> , 0.18)                                                                                                                                                                                    | N <sub>2</sub>                         | -0.98, -1.29, -1.42, -1.86 (in N <sub>2</sub> ), -1.75 (in CO <sub>2</sub> )                                              | 16        |
|             | CO <sub>2</sub>                        |                                                                                                                                                                                                                                                                                                  | CO <sub>2</sub>                        |                                                                                                                           |           |
| <b>FePL</b> | N <sub>2</sub>                         | -0.62 (in CO <sub>2</sub> , 0.10), -0.63 (in N <sub>2</sub> , 0.13), -1.13 (in CO <sub>2</sub> , 0.09), -1.14 (in N <sub>2</sub> , 0.14), -1.38 (in CO <sub>2</sub> , 0.06), -1.40 (in N <sub>2</sub> , 0.08), -1.51 (in CO <sub>2</sub> , 0.13), -1.54 (in N <sub>2</sub> , 0.14), -1.83 (0.10) | N <sub>2</sub>                         | -0.59, -1.19, -1.53, -1.84                                                                                                | This work |
|             | CO <sub>2</sub>                        |                                                                                                                                                                                                                                                                                                  | CO <sub>2</sub>                        | -0.61, -1.16, -1.39, -1.48, -1.51, -1.83                                                                                  |           |
| <b>FePw</b> | N <sub>2</sub>                         | -0.63 (0.08), -1.18 (0.06), -1.38 (0.06), -1.50 (0.06), -1.97 (0.07)                                                                                                                                                                                                                             | N <sub>2</sub>                         | -0.62, -1.19, -1.38, -1.47 (CO <sub>2</sub> ), -1.51 (N <sub>2</sub> ), -1.86 (CO <sub>2</sub> ), -1.97 (N <sub>2</sub> ) | This work |
|             | CO <sub>2</sub>                        | -0.63 (0.08), -1.17 (0.07), -1.38 (0.06), -1.46 (0.07), -1.84 (0.09)                                                                                                                                                                                                                             | CO <sub>2</sub>                        |                                                                                                                           |           |



**Table S2.** Summary of passed charges and the relative ratio between charges during chronoamperometry at different  $E_{\text{appl}}$  for **CoP<sub>L</sub>** and **CoP<sub>w</sub>** in DMF and GCE|**CoP<sub>L</sub>** and FTO|**CoP<sub>L</sub>** in 0.1 M NaHCO<sub>3</sub>.

|                        | Experimental conditions                                | $E_{\text{appl}}$ (V vs $\text{Fc}^{0/+}$ ) | Coulombs (C) <sup>a</sup> | Relative ratio between Coulomb values <sup>b</sup> | Theoretical ratio <sup>c</sup> | Accumulative number of $e^-$ <sup>d</sup> |
|------------------------|--------------------------------------------------------|---------------------------------------------|---------------------------|----------------------------------------------------|--------------------------------|-------------------------------------------|
| <b>CoP<sub>w</sub></b> | N <sub>2</sub> saturated 0.2 M TBAPF <sub>6</sub> DMF  | -0.90                                       | $2.64 \cdot 10^{-5}$      | 0.17                                               | 0.17<br>0.33<br>0.67<br>1.00   | 1<br>2<br>4<br>6                          |
|                        |                                                        | -1.15                                       | $6.06 \cdot 10^{-5}$      | 0.39                                               |                                |                                           |
|                        |                                                        | -1.30                                       | $1.03 \cdot 10^{-4}$      | 0.67                                               |                                |                                           |
|                        |                                                        | -1.50                                       | $1.52 \cdot 10^{-4}$      | 1.00                                               |                                |                                           |
|                        | CO <sub>2</sub> saturated 0.2 M TBAPF <sub>6</sub> DMF | -0.90                                       | $2.88 \cdot 10^{-5}$      | 0.19                                               |                                |                                           |
|                        |                                                        | -1.15                                       | $6.25 \cdot 10^{-5}$      | 0.41                                               |                                |                                           |
|                        |                                                        | -1.30                                       | $9.51 \cdot 10^{-5}$      | 0.62                                               |                                |                                           |
|                        |                                                        | -1.50                                       | $1.53 \cdot 10^{-4}$      | 1.00                                               |                                |                                           |
| <b>CoP<sub>L</sub></b> | N <sub>2</sub> saturated 0.2 M TBAPF <sub>6</sub> DMF  | -0.90                                       | $1.58 \cdot 10^{-5}$      | 0.17                                               | 0.17<br>0.33<br>0.67<br>1.00   | 1<br>2<br>4<br>6                          |
|                        |                                                        | -1.15                                       | $3.09 \cdot 10^{-5}$      | 0.33                                               |                                |                                           |
|                        |                                                        | -1.30                                       | $6.20 \cdot 10^{-5}$      | 0.65                                               |                                |                                           |
|                        |                                                        | -1.50                                       | $9.52 \cdot 10^{-5}$      | 1.00                                               |                                |                                           |
|                        | CO <sub>2</sub> saturated 0.2 M TBAPF <sub>6</sub> DMF | -0.90                                       | $1.56 \cdot 10^{-5}$      | 0.15                                               |                                |                                           |
|                        |                                                        | -1.15                                       | $3.49 \cdot 10^{-5}$      | 0.35                                               |                                |                                           |
|                        |                                                        | -1.30                                       | $5.69 \cdot 10^{-5}$      | 0.56                                               |                                |                                           |
|                        |                                                        | -1.50                                       | $1.01 \cdot 10^{-4}$      | 1.00                                               |                                |                                           |

<sup>a</sup> obtained from chronoamperometry measurement at  $E_{\text{appl}}$  after 60 seconds. <sup>b</sup> Calculated from dividing the coulomb values obtained at more anodic  $E_{\text{appl}}$  by the coulomb value obtained at  $E_{\text{appl}} = -1.50$  V vs  $\text{Fc}^{0/+}$ . <sup>c</sup> Fractions corresponding to one (0.17), two (0.33), four (0.67) and six (1.00)  $e^-$ . <sup>d</sup> Calculated based on the relative experimental ratios and assuming a total number of six  $e^-$ .

**Table S3.** Summary of integrated areas and the relative ratio between areas obtained from the fitting reduction SWV peaks shown in Figure S16 for **CoP<sub>w</sub>** and **CoP<sub>L</sub>** in DMF, and for GCE|**CoP<sub>L</sub>** and FTO|**CoP<sub>L</sub>** in 0.1 M NaHCO<sub>3</sub> shown in Figure 5A.

|                             | Experimental conditions                                      | E <sub>red</sub> (V vs Fc <sup>0/+</sup> ) | Integrated area (10 <sup>-7</sup> ) <sup>a</sup> | Area (%)             | Relative ratio between % areas <sup>b</sup> | Number of e <sup>-</sup> <sup>c</sup> |
|-----------------------------|--------------------------------------------------------------|--------------------------------------------|--------------------------------------------------|----------------------|---------------------------------------------|---------------------------------------|
| <b>CoP<sub>w</sub></b>      | CO <sub>2</sub> saturated<br>0.2 M<br>TBAPF <sub>6</sub> DMF | -0.98                                      | 3.21                                             | 0.12                 | 0.33                                        | 0.71                                  |
|                             |                                                              | -1.23                                      | 4.25                                             | 0.15                 | 0.44                                        | 0.94                                  |
|                             |                                                              | -1.37                                      | 9.89                                             | 0.37                 | 1.02                                        | 2.19                                  |
|                             |                                                              | -1.46                                      | 9.72                                             | 0.36                 | 1.00                                        | 2.15                                  |
| <b>CoP<sub>L</sub></b>      | CO <sub>2</sub> saturated<br>0.2 M<br>TBAPF <sub>6</sub> DMF | -0.80 & -0.99                              | 3.44 & 5.82                                      | 0.13 (= 0.05 + 0.08) | 0.29                                        | 0.82                                  |
|                             |                                                              | -1.20                                      | 10.61                                            | 0.16                 | 0.36                                        | 0.95                                  |
|                             |                                                              | -1.37                                      | 17.54                                            | 0.26                 | 0.58                                        | 1.56                                  |
|                             |                                                              | -1.48                                      | 29.98                                            | 0.45                 | 1.00                                        | 2.67                                  |
|                             |                                                              |                                            |                                                  |                      |                                             |                                       |
| GCE  <b>CoP<sub>L</sub></b> | N <sub>2</sub> saturated<br>0.1 M<br>NaHCO <sub>3</sub>      | -0.38                                      | 16.90                                            | 0.73                 | 2.70                                        | 2.92                                  |
|                             |                                                              | -0.50                                      | 6.28                                             | 0.27                 | 1.00                                        | 1.08                                  |
|                             | CO <sub>2</sub> saturated<br>0.1 M<br>NaHCO <sub>3</sub>     | -0.32                                      | 6.51                                             | 0.32                 | 0.47                                        | 1.29                                  |
|                             |                                                              | -0.51                                      | 13.68                                            | 0.68                 | 1.00                                        | 2.71                                  |
| FTO  <b>CoP<sub>L</sub></b> | N <sub>2</sub> saturated<br>0.1 M<br>NaHCO <sub>3</sub>      | -0.29                                      | 96.03                                            | 0.80                 | 4.11                                        | 3.22                                  |
|                             |                                                              | -0.69                                      | 23.36                                            | 0.20                 | 1.00                                        | 0.78                                  |
|                             | CO <sub>2</sub> saturated<br>0.1 M<br>NaHCO <sub>3</sub>     | -0.11                                      | 39.47                                            | 0.33                 | 0.49                                        | 1.31                                  |
|                             |                                                              | -0.36 & -0.54                              | 64.36 & 16.93                                    | 0.67 (=0.53 + 0.14)  | 1.00                                        | 2.69                                  |

<sup>a</sup> obtained using *Multi Peak Fit* function in *OriginPro 2017*. <sup>b</sup> Calculated from dividing the three first % areas by the % area obtained at peaks with E<sub>red</sub> = -1.46 or -1.48 V vs Fc<sup>0/+</sup> in **CoP<sub>w</sub>** or **CoP<sub>L</sub>**, respectively. <sup>c</sup> calculated from multiplying the % areas per 6 e<sup>-</sup> for **CoP<sub>w</sub>** and **CoP<sub>L</sub>** in DMF, or per 4 e<sup>-</sup> for GCE|**CoP<sub>L</sub>** and FTO|**CoP<sub>L</sub>**.

## Summary of dynamic light scattering results

**Table S4.** Summary of DLS results obtained for different DMPC liposomes containing [DMPC] = 100  $\mu$ M, [NaDSPE-PEG2K] = 1  $\mu$ M, [RuPS<sub>L</sub>] = 10  $\mu$ M and [alkylated catalyst] = 20-500 nM. All experiments were conducted in 0.1 M NaHCO<sub>3</sub> solutions at 25 °C.

| Lipid            | Catalyst         | Catalyst concentration (nM) | Buffer                           | Average size (nm) | Polydispersity index |
|------------------|------------------|-----------------------------|----------------------------------|-------------------|----------------------|
| DMPC             | CoP <sub>L</sub> | 500                         | NaHCO <sub>3</sub>               | 150 ± 6           | 0.09 ± 0.02          |
|                  |                  | 200                         |                                  | 144 ± 6           | 0.08 ± 0.02          |
|                  |                  | 50                          |                                  | 153 ± 6           | 0.08 ± 0.02          |
|                  |                  | 20                          |                                  | 149 ± 6           | 0.10 ± 0.04          |
|                  |                  | 500 (No RuPS <sub>L</sub> ) |                                  | 162 ± 7           | 0.10 ± 0.02          |
|                  |                  | 0                           |                                  | 142 ± 5           | 0.10 ± 0.04          |
|                  |                  | 500                         | NaH <sub>2</sub> PO <sub>4</sub> | 155 ± 4           | 0.06 ± 0.02          |
|                  |                  | 200                         |                                  | 156 ± 3           | 0.05 ± 0.03          |
|                  |                  | 50                          |                                  | 154 ± 5           | 0.09 ± 0.01          |
|                  |                  | 20                          |                                  | 153 ± 5           | 0.08 ± 0.02          |
|                  |                  | 500 (No RuPS <sub>L</sub> ) |                                  | 155 ± 3           | 0.12 ± 0.03          |
|                  |                  | 0                           |                                  | 198 ± 7           | 0.15 ± 0.04          |
|                  | CoT <sub>L</sub> | 500                         | NaHCO <sub>3</sub>               | 151 ± 9           | 0.14 ± 0.01          |
|                  |                  | 200                         |                                  | 149 ± 4           | 0.07 ± 0.02          |
|                  |                  | 50                          |                                  | 146 ± 6           | 0.07 ± 0.01          |
|                  |                  | 20                          |                                  | 155 ± 7           | 0.10 ± 0.02          |
|                  | NiP <sub>L</sub> | 500                         |                                  | 151 ± 6           | 0.07 ± 0.02          |
|                  |                  | 200                         |                                  | 149 ± 5           | 0.09 ± 0.03          |
|                  |                  | 50                          |                                  | 149 ± 7           | 0.08 ± 0.02          |
|                  |                  | 20                          |                                  | 151 ± 7           | 0.08 ± 0.01          |
|                  | NiT <sub>L</sub> | 500                         |                                  | 139 ± 2           | 0.09 ± 0.01          |
|                  |                  | 200                         |                                  | 145 ± 3           | 0.07 ± 0.01          |
|                  |                  | 50                          |                                  | 139 ± 2           | 0.10 ± 0.01          |
|                  |                  | 20                          |                                  | 133 ± 5           | 0.09 ± 0.02          |
|                  | FeP <sub>L</sub> | 500                         | 136 ± 1                          | 0.07 ± 0.01       |                      |
|                  |                  | 200                         | 137 ± 1                          | 0.09 ± 0.01       |                      |
|                  |                  | 50                          | 141 ± 2                          | 0.09 ± 0.01       |                      |
|                  |                  | 20                          | 146 ± 2                          | 0.04 ± 0.01       |                      |
| FeT <sub>L</sub> | 500              | 146 ± 4                     | 0.08 ± 0.03                      |                   |                      |
|                  | 200              | 151 ± 6                     | 0.06 ± 0.03                      |                   |                      |
|                  | 50               | 146 ± 5                     | 0.06 ± 0.01                      |                   |                      |
|                  | 20               | 144 ± 5                     | 0.06 ± 0.02                      |                   |                      |

**Table S5.** Summary of DLS results obtained for liposomes solutions containing different DMPC lipid-concentrations and different lipid types (DLPC, DMPC, DPPC). [lipid] = 100-400  $\mu\text{M}$ , [NaDSPE-PEG2K] = 1  $\mu\text{M}$ , [RuPS<sub>L</sub>] = 10  $\mu\text{M}$  and [CoP<sub>L</sub> or NiT<sub>L</sub>] = 500 nM. All measurements were conducted in 0.1 M NaHCO<sub>3</sub> solutions at 25 °C.

| Lipid | Lipid concentration (mM) | Catalyst         | Catalyst concentration (nM) | Average size (nm) | DPI         |
|-------|--------------------------|------------------|-----------------------------|-------------------|-------------|
| DMPC  | 100                      | CoP <sub>L</sub> | 500                         | 150 ± 6           | 0.09 ± 0.02 |
|       | 200                      |                  |                             | 153 ± 5           | 0.11 ± 0.02 |
|       | 400                      |                  |                             | 141 ± 4           | 0.07 ± 0.02 |
| DLPC  | 100                      | CoP <sub>L</sub> | 500                         | 114 ± 2           | 0.11 ± 0.01 |
| DMPC  |                          |                  |                             | 150 ± 6           | 0.09 ± 0.02 |
| DPPC  |                          |                  |                             | 194 ± 6           | 0.12 ± 0.02 |
| DLPC  | 100                      | NiT <sub>L</sub> | 500                         | 130 ± 4           | 0.11 ± 0.01 |
| DMPC  |                          |                  |                             | 143 ± 3           | 0.09 ± 0.01 |
| DPPC  |                          |                  |                             | 173 ± 5           | 0.14 ± 0.01 |

**Table S6.** Summary of DLS results obtained as a function of irradiation time for liposomes solutions containing [DMPC] = 100  $\mu\text{M}$  and [NaDSPE-PEG2K] = 1  $\mu\text{M}$ , or [DMPC] = 100  $\mu\text{M}$  and [NaDSPE-PEG2K] = 1  $\mu\text{M}$  [RuPS<sub>L</sub>] = 10  $\mu\text{M}$  and [CoP<sub>L</sub>] = 500 nM. All measurements were conducted in 0.1 M NaHCO<sub>3</sub> and 0.1 M sodium ascorbate solutions at 25 °C. NB: the difference in average liposome sizes between Tables S4 and S6 is due to isotonic vs hypotonic effects.<sup>17</sup>

| Time (h) | Irradiation | Content        | Average size (nm) | DPI          |
|----------|-------------|----------------|-------------------|--------------|
| 0        | Dark        | Only lipids    | 128 ± 2           | 0.129 ± 0.02 |
|          |             | All components | 119 ± 1           | 0.135 ± 0.02 |
|          | Light       | Only lipids    | 121 ± 1           | 0.144 ± 0.01 |
|          |             | All components | 122 ± 1           | 0.118 ± 0.02 |
| 1        | Dark        | Only lipids    | 134 ± 2           | 0.117 ± 0.02 |
|          |             | All components | 118 ± 1           | 0.239 ± 0.01 |
|          | Light       | Only lipids    | 135 ± 1           | 0.110 ± 0.01 |
|          |             | All components | 122 ± 1           | 0.118 ± 0.02 |
| 2        | Dark        | Only lipids    | 162 ± 5           | 0.257 ± 0.01 |
|          |             | All components | 126 ± 1           | 0.142 ± 0.01 |
|          | Light       | Only lipids    | 126 ± 1           | 0.142 ± 0.02 |
|          |             | All components | 127 ± 1           | 0.172 ± 0.01 |
| 3        | Dark        | Only lipids    | 132 ± 1           | 0.125 ± 0.02 |
|          |             | All components | 120 ± 1           | 0.184 ± 0.01 |
|          | Light       | Only lipids    | 128 ± 1           | 0.128 ± 0.01 |
|          |             | All components | 120 ± 1           | 0.208 ± 0.01 |
| 4        | Dark        | Only lipids    | 129 ± 1           | 0.131 ± 0.03 |
|          |             | All components | 125 ± 1           | 0.140 ± 0.01 |
|          | Light       | Only lipids    | 129 ± 2           | 0.152 ± 0.01 |
|          |             | All components | 125 ± 2           | 0.170 ± 0.01 |

## Tabulated photocatalysis results

**Table S7.** Summary of all photocatalytic experiment results obtained from all alkylated catalysts in DMPC liposomes. All experiments were carried out in CO<sub>2</sub>-saturated 0.1 M NaHCO<sub>3</sub> and 0.1 M sodium ascorbate solutions for 4 hours under visible light and at 25 °C, and in triplicates. In addition to CO and H<sub>2</sub> no other products such as formate or CH<sub>4</sub> were detected. <sup>a</sup>CO selectivity (%) =  $n_{\text{CO}} / (n_{\text{CO}} + n_{\text{H}_2}) \times 100$ .

| Catalyst         | Catalyst concentration (nm) | Gaseous products and rate of formation after 4-hour experiments |                       |                   |                              |                                      |                                                 |                    |                               |                                 |
|------------------|-----------------------------|-----------------------------------------------------------------|-----------------------|-------------------|------------------------------|--------------------------------------|-------------------------------------------------|--------------------|-------------------------------|---------------------------------|
|                  |                             | CO (nmol)                                                       | H <sub>2</sub> (nmol) | TON <sub>CO</sub> | TON <sub>H<sub>2</sub></sub> | TOF <sub>CO</sub> (h <sup>-1</sup> ) | TOF <sub>H<sub>2</sub></sub> (h <sup>-1</sup> ) | PTON <sub>CO</sub> | PTON <sub>H<sub>2</sub></sub> | CO selectivity (%) <sup>a</sup> |
| CoP <sub>L</sub> | 500                         | 282.9 ± 11.2                                                    | 54.6 ± 8.9            | 188.6 ± 7.5       | 36.4 ± 5.9                   | 47.1 ± 11.7                          | 9.1 ± 2.1                                       | 18.9 ± 0.4         | 3.6 ± 0.3                     | 84 ± 1                          |
|                  | 200                         | 193.5 ± 7.2                                                     | 30.9 ± 3.1            | 322.5 ± 12.1      | 51.4 ± 5.1                   | 80.6 ± 41.5                          | 12.9 ± 7.1                                      | 12.9 ± 0.2         | 2.1 ± 0.1                     | 86 ± 1                          |
|                  | 50                          | 71.5 ± 1.3                                                      | 18.1 ± 2.4            | 476.4 ± 8.6       | 120.5 ± 16.2                 | 119.1 ± 19.9                         | 30.1 ± 2.1                                      | 4.8 ± 0.1          | 1.2 ± 0.1                     | 82 ± 3                          |
|                  | 20                          | 44.1 ± 5.5                                                      | 13.5 ± 1.4            | 735.1 ± 91.3      | 224.7 ± 24.1                 | 183.8 ± 6.2                          | 56.2 ± 11.9                                     | 2.9 ± 0.2          | 0.9 ± 0.1                     | 78 ± 4                          |
| CoT <sub>L</sub> | 500                         | 48.9 ± 18.0                                                     | 9.8 ± 2.0             | 32.6 ± 12.0       | 6.5 ± 1.3                    | 8.1 ± 1.6                            | 1.6 ± 0.4                                       | 3.3 ± 0.6          | 0.6 ± 0.1                     | 87 ± 2                          |
|                  | 200                         | 95.2 ± 10.0                                                     | 12.7 ± 3.3            | 158.6 ± 16.6      | 21.1 ± 5.5                   | 39.7 ± 4.0                           | 5.3 ± 1.4                                       | 6.3 ± 0.3          | 0.8 ± 0.1                     | 92 ± 3                          |
|                  | 50                          | 57.7 ± 3.8                                                      | 15.2 ± 0.5            | 384.4 ± 25.6      | 101.2 ± 19.4                 | 96.1 ± 15.9                          | 25.3 ± 4.6                                      | 3.8 ± 0.1          | 1.0 ± 0.1                     | 81 ± 2                          |
|                  | 20                          | 35.4 ± 4.8                                                      | 8.2 ± 3.8             | 589.6 ± 79.7      | 137.3 ± 64.0                 | 147.4 ± 28.7                         | 34.3 ± 6.4                                      | 2.4 ± 0.2          | 0.5 ± 0.1                     | 82 ± 2                          |
| NiP <sub>L</sub> | 500                         | 27.3 ± 3.9                                                      | 14.6 ± 3.0            | 18.2 ± 2.6        | 9.7 ± 2.0                    | 4.6 ± 1.1                            | 2.4 ± 0.4                                       | 1.8 ± 0.1          | 1.0 ± 0.1                     | 62 ± 6                          |
|                  | 200                         | 14.3 ± 2.7                                                      | 5.6 ± 2.6             | 23.9 ± 4.5        | 9.4 ± 4.4                    | 6.0 ± 1.5                            | 2.3 ± 0.5                                       | 1.0 ± 0.1          | 0.4 ± 0.1                     | 70 ± 2                          |
|                  | 50                          | 10.9 ± 0.6                                                      | 6.8 ± 2.1             | 73.0 ± 3.8        | 45.7 ± 13.7                  | 18.2 ± 4.7                           | 11.4 ± 2.5                                      | 0.7 ± 0.1          | 0.5 ± 0.1                     | 56 ± 6                          |
|                  | 20                          | 11.1 ± 3.6                                                      | 4.3 ± 1.9             | 184.5 ± 60.5      | 71.8 ± 31.8                  | 46.1 ± 14.1                          | 18.0 ± 5.0                                      | 0.7 ± 0.1          | 0.3 ± 0.1                     | 71 ± 2                          |
| NiT <sub>L</sub> | 500                         | 24.8 ± 5.0                                                      | 12.8 ± 4.5            | 16.5 ± 3.3        | 8.5 ± 3.0                    | 4.1 ± 0.3                            | 2.1 ± 0.6                                       | 1.7 ± 0.2          | 0.8 ± 0.1                     | 74 ± 7                          |
|                  | 200                         | 27.6 ± 5.5                                                      | 11.5 ± 2.1            | 46.0 ± 9.2        | 19.2 ± 3.4                   | 11.5 ± 0.7                           | 4.8 ± 1.6                                       | 1.8 ± 0.2          | 0.8 ± 0.1                     | 77 ± 8                          |
|                  | 50                          | 26.2 ± 0.8                                                      | 7.7 ± 1.3             | 174.3 ± 5.6       | 51.6 ± 8.4                   | 43.6 ± 6.3                           | 12.9 ± 3.1                                      | 1.7 ± 0.1          | 0.5 ± 0.1                     | 79 ± 3                          |
|                  | 20                          | 28.5 ± 2.7                                                      | 8.2 ± 3.0             | 474.8 ± 44.3      | 137.0 ± 50.3                 | 118.7 ± 16.3                         | 34.2 ± 11.1                                     | 1.9 ± 0.1          | 0.5 ± 0.1                     | 82 ± 6                          |
| FeP <sub>L</sub> | 500                         | 26.7 ± 3.8                                                      | 8.4 ± 1.1             | 17.8 ± 2.5        | 5.6 ± 0.7                    | 4.5 ± 1.0                            | 1.4 ± 0.5                                       | 1.8 ± 0.1          | 0.6 ± 0.1                     | 82 ± 5                          |
|                  | 200                         | 25.7 ± 2.5                                                      | 8.4 ± 0.8             | 42.9 ± 4.1        | 14.0 ± 1.4                   | 10.7 ± 2.6                           | 3.5 ± 1.0                                       | 1.7 ± 0.1          | 0.6 ± 0.1                     | 78 ± 2                          |
|                  | 50                          | 27.5 ± 3.4                                                      | 23.8 ± 4.9            | 183.5 ± 22.4      | 158.6 ± 32.4                 | 45.9 ± 10.1                          | 39.6 ± 5.8                                      | 1.8 ± 0.1          | 1.6 ± 0.2                     | 50 ± 3                          |
|                  | 20                          | 26.9 ± 3.2                                                      | 25.0 ± 3.5            | 448.3 ± 53.5      | 416.6 ± 58.5                 | 112.1 ± 24.6                         | 104.1 ± 10.5                                    | 1.8 ± 0.1          | 1.7 ± 0.1                     | 47 ± 5                          |
| FeT <sub>L</sub> | 500                         | 51.9 ± 12.5                                                     | 11.1 ± 2.3            | 34.6 ± 8.3        | 7.4 ± 7.4                    | 8.7 ± 0.9                            | 1.8 ± 0.4                                       | 3.5 ± 0.4          | 0.7 ± 0.1                     | 87 ± 3                          |
|                  | 200                         | 38.4 ± 4.3                                                      | 9.8 ± 2.6             | 64.0 ± 7.1        | 16.4 ± 4.4                   | 16.0 ± 2.4                           | 4.1 ± 0.7                                       | 2.6 ± 0.1          | 0.7 ± 0.1                     | 81 ± 2                          |
|                  | 50                          | 38.1 ± 2.2                                                      | 8.7 ± 1.6             | 254.2 ± 14.8      | 58.6 ± 10.4                  | 63.6 ± 14.4                          | 14.7 ± 3.6                                      | 2.5 ± 0.1          | 0.6 ± 0.1                     | 83 ± 3                          |
|                  | 20                          | 26.6 ± 5.5                                                      | 11.1 ± 0.7            | 442.8 ± 91.3      | 185.2 ± 11.5                 | 110.7 ± 34.9                         | 46.3 ± 11.7                                     | 1.8 ± 0.2          | 0.7 ± 0.1                     | 66 ± 4                          |

**Table S8.** Summary of photocatalytic control experiment results obtained from (orange shade) DMPC liposomes and (blue shade) homogeneous analogous systems. All experiments were conducted in CO<sub>2</sub>- or N<sub>2</sub>-saturated 0.1 M NaHCO<sub>3</sub> and 0.1 M sodium ascorbate solutions for 4 hours under visible light and at 25 °C, and in triplicates. [Photosensitizer] = 10 μM and [Catalyst] = 500 nM. Symbols “√” and “-” stand for “included” and “not included” respectively, and “n. d.” stands for “not detected”. Colour code: alkylated catalysts (red shaded), water-soluble catalysts (blue shaded).

| Type of catalyst | Components |                 |                  |                              | Gaseous products after 4-hour experiments |                       |                   |                              |                                 |
|------------------|------------|-----------------|------------------|------------------------------|-------------------------------------------|-----------------------|-------------------|------------------------------|---------------------------------|
|                  | Catalyst   | Photosensitizer | Sodium ascorbate | CO <sub>2</sub> <sup>a</sup> | CO (nmol)                                 | H <sub>2</sub> (nmol) | TON <sub>CO</sub> | TON <sub>H<sub>2</sub></sub> | CO selectivity (%) <sup>b</sup> |
| CoP <sub>L</sub> | √          | √               | √                | √                            | 282.9 ± 11.2                              | 54.6 ± 8.9            | 188.6 ± 7.5       | 36.4 ± 5.9                   | 84 ± 1                          |
|                  | √          | √               | √                | √                            | n.d. <sup>c</sup>                         | n.d.                  | -                 | -                            | -                               |
|                  | √          | -               | √                | √                            | n.d.                                      | n.d.                  | -                 | -                            | -                               |
|                  | -          | √               | √                | √                            | 6.1 ± 0.8                                 | 5.1 ± 0.1             | -                 | -                            | 54 ± 1                          |
|                  | √          | √               | -                | √                            | n.d.                                      | n.d.                  | -                 | -                            | -                               |
|                  | √          | √               | √                | -                            | 2.0 <sup>d</sup>                          | 2.9                   | 1.3               | 3.8                          | 27                              |
| CoP <sub>w</sub> | √          | √               | √                | √                            | 96.8 ± 1.4                                | 14.5 ± 0.7            | 64.5 ± 0.9        | 9.7 ± 0.5                    | 87 ± 1                          |
|                  | -          | √               | √                | √                            | 28.4 ± 7.2                                | 30.5 ± 12.2           | -                 | -                            | 48 ± 2                          |
| CoT <sub>L</sub> | √          | √               | √                | √                            | 48.9 ± 18.0                               | 9.8 ± 2.0             | 32.6 ± 12.0       | 6.5 ± 1.3                    | 87 ± 2                          |
| CoT <sub>w</sub> | √          | √               | √                | √                            | 42.8 ± 9.4                                | 87.3 ± 39.1           | 28.6 ± 6.3        | 58.2 ± 26.1                  | 33 ± 11                         |
| NiP <sub>L</sub> | √          | √               | √                | √                            | 27.3 ± 3.0                                | 14.6 ± 3.0            | 18.2 ± 2.6        | 9.7 ± 2.0                    | 62 ± 6                          |
| NiP <sub>w</sub> | √          | √               | √                | √                            | 76.9 ± 4.2                                | 41.9 ± 6.9            | 51.3 ± 3          | 28.0 ± 4.6                   | 65 ± 6                          |
| NiT <sub>L</sub> | √          | √               | √                | √                            | 24.8 ± 5.0                                | 12.8 ± 4.5            | 16.5 ± 3.3        | 8.5 ± 3.0                    | 74 ± 7                          |
| NiT <sub>w</sub> | √          | √               | √                | √                            | 11.4 ± 2.1                                | 4.4 ± 0.2             | 7.6 ± 1.4         | 3.0 ± 0.2                    | 72 ± 5                          |
| FeP <sub>L</sub> | √          | √               | √                | √                            | 26.7 ± 3.8                                | 8.4 ± 1.1             | 17.8 ± 2.5        | 5.6 ± 0.7                    | 82 ± 5                          |
| FeP <sub>w</sub> | √          | √               | √                | √                            | 33.4 ± 8.0                                | 47.4 ± 22.7           | 22.3 ± 5.3        | 31.6 ± 15.2                  | 41 ± 16                         |
| FeT <sub>L</sub> | √          | √               | √                | √                            | 51.9 ± 12.5                               | 11.1 ± 2.3            | 34.6 ± 8.3        | 7.4 ± 7.4                    | 87 ± 3                          |
| FeT <sub>w</sub> | √          | √               | √                | √                            | 27.6 ± 3.1                                | 87.6 ± 14.2           | 18.4 ± 2.1        | 58.4 ± 9.4                   | 24 ± 2                          |

<sup>a</sup> Symbol “√” stands for CO<sub>2</sub>-saturated and “-” for N<sub>2</sub>-saturated 0.1M NaHCO<sub>3</sub> and 0.1 M sodium ascorbate solutions. <sup>b</sup> CO selectivity (%) = n<sub>CO</sub> / (n<sub>CO</sub> + n<sub>H<sub>2</sub></sub>) x 100. <sup>c</sup> Experiments were carried out in the dark. <sup>d</sup> Detected CO is likely produced by the reduction of CO<sub>2</sub> coming from NaHCO<sub>3</sub>.

**Table S9.** Summary of photocatalytic gaseous products obtained by using different CO<sub>2</sub>-saturated buffered solutions [0.1 M NaHCO<sub>3</sub> (pH = 6.7) vs 0.1 M NaH<sub>2</sub>PO<sub>4</sub> (pH = 6.3)] with DMPC liposomes containing 20:1 **RuPS<sub>L</sub>:CoP<sub>L</sub>** or homogeneous **RuPS<sub>w</sub>:CoP<sub>w</sub>**. Liposomes were composed of [DMPC] = 100 μM, [NaDSPE-PEG2K] = 1 μM, [RuPS<sub>L</sub>] = 10 μM and [CoP<sub>L</sub>] = 20-500 nM, and homogeneous solution contained [RuPS<sub>w</sub>] = 10 μM and [CoP<sub>w</sub>] = 20-500 nM. All experiments were conducted for four hours under visible light (λ > 400 nm, AM 1.5G, 100 mW cm<sup>-2</sup>), at 25 °C, and in triplicates (liposomes) or in duplicates (homogeneous).

| Catalyst         | Catalyst concentration (nm) | Buffer                           | CO (nmol)     | H <sub>2</sub> (nmol) | TON <sub>CO</sub> | TON <sub>H<sub>2</sub></sub> | CO selectivity (%) <sup>a</sup> |
|------------------|-----------------------------|----------------------------------|---------------|-----------------------|-------------------|------------------------------|---------------------------------|
| CoP <sub>L</sub> | 500                         | NaHCO <sub>3</sub>               | 282.9 ± 11.2  | 54.6 ± 8.9            | 188.6 ± 7.5       | 36.4 ± 5.9                   | 84 ± 1                          |
|                  | 200                         |                                  | 193.5 ± 7.2   | 30.9 ± 3.1            | 322.5 ± 12.1      | 51.4 ± 5.1                   | 86 ± 1                          |
|                  | 50                          |                                  | 71.5 ± 1.3    | 18.1 ± 2.4            | 476.4 ± 8.6       | 120.5 ± 16.2                 | 82 ± 3                          |
|                  | 20                          |                                  | 44.1 ± 5.5    | 13.5 ± 1.4            | 735.1 ± 91.3      | 224.7 ± 24.1                 | 78 ± 4                          |
|                  | 0                           |                                  | 6.1 ± 0.8     | 5.1 ± 0.1             | -                 | -                            | 54 ± 1                          |
|                  | 500                         | NaH <sub>2</sub> PO <sub>4</sub> | 541.3 ± 18.7  | 119.7 ± 4.7           | 360.8 ± 12.5      | 79.8 ± 3.1                   | 82 ± 1                          |
|                  | 200                         |                                  | 290.1 ± 5.5   | 78.4 ± 0.2            | 483.5 ± 9.1       | 130.6 ± 0.3                  | 79 ± 1                          |
|                  | 50                          |                                  | 102.8 ± 1.6   | 39.3 ± 5.9            | 685.5 ± 10.9      | 261.9 ± 39.1                 | 72 ± 4                          |
|                  | 20                          |                                  | 87.3 ± 2.1    | 26.0 ± 0.1            | 1455.5 ± 35.5     | 433.6 ± 0.5                  | 77 ± 1                          |
|                  | 0                           |                                  | 40.8 ± 12.2   | 105.6 ± 93.2          | -                 | -                            | 28 ± 18                         |
| CoP <sub>w</sub> | 500                         | NaHCO <sub>3</sub>               | 96.8 ± 1.4    | 14.5 ± 0.7            | 64.5 ± 0.9        | 9.7 ± 1.0                    | 87 ± 1                          |
|                  | 200                         |                                  | 62.1 ± 0.3    | 27.7 ± 1.4            | 103.5 ± 0.5       | 46.1 ± 2.3                   | 69 ± 1                          |
|                  | 50                          |                                  | 64.0 ± 1.0    | 26.9 ± 1.4            | 426.7 ± 6.7       | 179.3 ± 9.2                  | 70 ± 1                          |
|                  | 20                          |                                  | 31.7 ± 0.2    | 22.7 ± 0.2            | 528.8 ± 2.9       | 379.1 ± 3.2                  | 58 ± 1                          |
|                  | 0                           |                                  | 28.4 ± 7.2    | 29.1 ± 12.8           | -                 | -                            | 49 ± 4                          |
|                  | 500                         | NaH <sub>2</sub> PO <sub>4</sub> | 198.8 ± 140.1 | 97.0 ± 82.9           | 132.5 ± 93.8      | 64.7 ± 55.3                  | 73 ± 10                         |
|                  | 200                         |                                  | 81.6 ± 7.0    | 114.6 ± 26.5          | 135.9 ± 11.7      | 191.0 ± 44.1                 | 42 ± 5                          |
|                  | 50                          |                                  | 18.1 ± 2.7    | 175.6 ± 14.8          | 120.8 ± 17.9      | 1170.4 ± 98.9                | 9 ± 1                           |
|                  | 20                          |                                  | 18.7 ± 1.3    | 145.5 ± 7.9           | 312.1 ± 22.4      | 2425.2 ± 131.2               | 11 ± 2                          |
|                  | 0                           |                                  | 6.7 ± 0.6     | 294.0 ± 31.2          | -                 | -                            | 2 ± 1                           |

<sup>a</sup> CO selectivity (%) =  $n_{CO} / (n_{CO} + n_{H_2}) \times 100$ .

**Table S10.** Summary of reported molecule- and enzyme-based photocatalytic systems for CO<sub>2</sub> reduction under aqueous conditions.

| Catalyst ( $\mu\text{M}$ )                                           | Photosensitizer ( $\mu\text{M}$ )                                                     | Sacrificial donor (M)                       | CO ( $\mu\text{mol}$ )          | TON (h)                    | QY (%)        | Solvent                                                                      | CO Sel. (%) | Reference |
|----------------------------------------------------------------------|---------------------------------------------------------------------------------------|---------------------------------------------|---------------------------------|----------------------------|---------------|------------------------------------------------------------------------------|-------------|-----------|
| Co( <i>p</i> TPPS) (0.25)                                            | CuInS <sub>2</sub> -SC <sub>2</sub> H <sub>4</sub> NH <sub>3</sub> <sup>+</sup> (2.5) | NaHAsc (0.025)<br>NaHAsc (0.005) + TCEP (5) | 36<br>42                        | 72,484 (96)<br>84,101 (96) | 3.39<br>0.96  | H <sub>2</sub> O                                                             | >99         | 18        |
| CODH enzyme (<0.1 nmol)                                              | CdS                                                                                   | MES (0.35)                                  | 2                               | 22,500                     | 0.01          | MES aq. Buffer                                                               | n. r.       | 19        |
| Co( <i>o</i> TMpyP) (5)                                              | Cu complex (500)                                                                      | NaHAsc (0.1)                                | 200                             | 4000 (12)                  | 5.7           | NaHCO <sub>3</sub> aq. buffer                                                | 90          | 20        |
| Co( <i>p</i> TMpyP), i.e. CoP <sub>W</sub> , (5)                     | Cu complex (500)                                                                      | NaHAsc (0.1)                                | 135                             | 2680 (4)                   | 1.6           | NaHCO <sub>3</sub> aq. buffer                                                | 77          | 4         |
| Co( <i>p</i> T CPP) (2.5)                                            | [Ru(bpy) <sub>3</sub> ]Cl <sub>2</sub> , i.e. RuPS <sub>W</sub> (500)                 | NaHAsc (0.1)                                | 63                              | 2500 (4)                   | 0.24          | NaHCO <sub>3</sub> aq. Buffer                                                | 74          | 21        |
| CODH enzyme (117)                                                    | RuP/TiO <sub>2</sub>                                                                  | MES (0.2)                                   | 6                               | 2100                       | n. r.         | MES aq. Buffer                                                               | n. r.       | 22        |
| CoP <sub>L</sub> (0.5)<br>CoP <sub>L</sub> (0.02)                    | RuPS <sub>L</sub> (10)                                                                | NaHAsc (0.1)                                | 0.28<br>0.09                    | 189 (4)<br>1456 (4)        | 0.16<br>n. r. | NaHCO <sub>3</sub> aq. Buffer<br>NaH <sub>2</sub> PO <sub>4</sub> aq. Buffer | 84<br>77    | This work |
| Co <sub>2</sub> -cryptate (1)                                        | MPA-CdS QD                                                                            | TEOA (0.3)                                  | 34                              | 1380 (120)                 | n. r.         | NaHCO <sub>3</sub> aq. buffer                                                | 95          | 23        |
| Co( <i>p</i> TPPS) (10)                                              | [Ru(bpy) <sub>3</sub> ]Cl <sub>2</sub> (500)                                          | NaHAsc (0.1)                                | 92                              | 926 (4)                    | 0.81          | NaHCO <sub>3</sub> aq. buffer                                                | 82          | 24        |
| Co(TPP-S <sub>3</sub> N <sub>1</sub> )                               | ZnSe                                                                                  | NaHAsc ()                                   | 18.6                            | 619 (16.7)                 | 5.1           | H <sub>2</sub> O                                                             | >40         | 25        |
| Fe( <i>p</i> TMAP) (1)                                               | MPA-CuInS <sub>2</sub> /ZnS QDs (30)                                                  | TEOA                                        | 0.22                            | 450 (30)                   | 0.025         | KCl aq.                                                                      | 99          | 26        |
| [Co(tpyP) <sub>2</sub> ] <sup>2+</sup> (17 nmol cm <sup>-2</sup> )   | SrTiO <sub>3</sub> :La,Rh Au RuO <sub>2</sub> -BiVO <sub>4</sub> :Mo                  | H <sub>2</sub> O                            | 6.53 cm <sup>-2</sup> (formate) | 399 (6)                    | 2.6           | KHCO <sub>3</sub> aq. Buffer                                                 | 97          | 27        |
| NiCycP (10)                                                          | BF <sub>4</sub> -ZnSe QDs (0.5)                                                       | NaHAsc (0.1)                                | 6                               | 283 (20)                   | 3.4           | H <sub>2</sub> O                                                             | 34          | 28        |
| Re(dtb)(CO <sub>3</sub> )Cl (40)                                     | Ru(dtb)(bpy) <sub>2</sub> ] (40)                                                      | NaHAsc (0.1)                                | 15                              | 190 (15)                   | n. r.         | Tris-HCl aq.                                                                 | 98          | 29        |
| Ru(dmb) <sub>2</sub> -(BL)-Re(CO <sub>3</sub> Cl) <sup>2+</sup> (50) |                                                                                       | Bi(CO <sub>2</sub> )H (0.01)                | 13                              | 130 (6)                    | 13.5          | H <sub>2</sub> O                                                             | 81          | 30        |
| [Ni(tpyS) <sub>2</sub> ] <sup>2+</sup> (100)                         | BF <sub>4</sub> -CdS (1)                                                              | TEOA (0.1)                                  | 4                               | 20 (22)                    | 0.28          | H <sub>2</sub> O                                                             | >90         | 14        |
| [Ni(cyclam)] <sup>2+</sup> (100)                                     | [Ru(bpy) <sub>3</sub> ] <sup>2+</sup> (5000)                                          | NaHAsc (0.5)                                | 3.6                             | 3.6                        | 0.14          | H <sub>2</sub> O–supercritical CO <sub>2</sub>                               | 87          | 31        |
| [Ni(cyclam)] <sup>2+</sup> (2000)                                    | [Ru(bpy) <sub>3</sub> ] <sup>2+</sup> (500)                                           | NaHAsc (1)                                  | n. r.                           | 0.1                        | n. r.         | H <sub>2</sub> O                                                             | 13          | 32        |



**Table S11.** Summary of photocatalytic gaseous products and CO selectivity obtained by modifying the concentration of the sacrificial electron donor sodium ascorbate (NaHAsc) with DMPC liposomes containing [DMPC] = 100  $\mu$ M, [NaDSPE-PEG2K] = 1  $\mu$ M, [RuPS<sub>L</sub>] = 10  $\mu$ M and [CoP<sub>L</sub>] = 500 nM. All experiments were performed in CO<sub>2</sub>-saturated 0.1M NaHCO<sub>3</sub> solution for four hours ( $\lambda$  > 400 nm, AM 1.5G, 100 mW cm<sup>-2</sup>) and in duplicates, with the exception of 100 mM sodium ascorbate solution which were performed as triplicates.

| [NaHAsc] (mM) | CO (nmol)         | H <sub>2</sub> (nmol) | TON <sub>CO</sub> | TON <sub>H<sub>2</sub></sub> | CO selectivity (%) <sup>a</sup> |
|---------------|-------------------|-----------------------|-------------------|------------------------------|---------------------------------|
| 0             | n.d. <sup>b</sup> | n.d.                  | -                 | -                            | -                               |
| 50            | 171.2 ± 32.8      | 27.2 ± 3.8            | 114.1 ± 21.9      | 18.1 ± 2.5                   | 86 ± 1                          |
| 100           | 282.9 ± 11.2      | 51.0 ± 12.7           | 188.6 ± 7.5       | 36.4 ± 5.9                   | 84 ± 1                          |
| 200           | 327.5 ± 37.6      | 58.9 ± 6.3            | 218.4 ± 25.1      | 39.3 ± 4.2                   | 85 ± 1                          |
| 400           | 390.0 ± 18.8      | 82.0 ± 4.6            | 260.0 ± 12.5      | 54.6 ± 3.1                   | 83 ± 1                          |

<sup>a</sup> CO selectivity (%) =  $n_{CO} / (n_{CO} + n_{H_2}) \times 100$ . <sup>b</sup> "n.d." stands for not detected.

**Table S12.** Summary of photocatalytic gaseous products obtained after two hours by using different light intensities with DMPC liposomes containing [DMPC] = 100  $\mu$ M, [NaDSPE-PEG2K] = 1  $\mu$ M, [RuPS<sub>L</sub>] = 10  $\mu$ M and [CoP<sub>L</sub>] = 500 nM. All experiments were conducted in CO<sub>2</sub>-saturated 0.1M NaHCO<sub>3</sub> and 0.1 M sodium ascorbate for two hours under visible light irradiation ( $\lambda$  > 400 nm, AM 1.5G, 100 mW cm<sup>-2</sup> for light intensity = 100 %) at 25 °C, and in triplicates.

| Light intensity (%) | CO (nmol) | H <sub>2</sub> (nmol) | TON <sub>CO</sub> | TON <sub>H<sub>2</sub></sub> | CO selectivity (%) <sup>a</sup> |
|---------------------|-----------|-----------------------|-------------------|------------------------------|---------------------------------|
| 100                 | 192.8±9.0 | 34.8±5.0              | 128.6±6.0         | 23.2±3.3                     | 85 ± 1                          |
| 90                  | 190.2±5.3 | 35.2±4.2              | 126.8±3.5         | 23.5±2.8                     | 84 ± 1                          |
| 50                  | 82.2±9.9  | 18.1±3.0              | 54.8±6.6          | 12.1±2.0                     | 82 ± 1                          |
| 20                  | 19.6±1.9  | 4.9±0.7               | 13.1±1.2          | 3.3±0.4                      | 80 ± 2                          |

<sup>a</sup> CO selectivity (%) =  $n_{CO} / (n_{CO} + n_{H_2}) \times 100$ .

**Table S13.** Summary of photocatalytic gaseous products obtained by using different lipids (DMPC, DLPC, DPPC at 100  $\mu\text{M}$ ) and concentrations of DMPC in liposomes, i.e. [DMPC] = 100-400  $\mu\text{M}$ , [NaDSPE-PEG2K] = 1-4  $\mu\text{M}$ , [RuPS<sub>L</sub>] = 10  $\mu\text{M}$  and [CoP<sub>L</sub>] = 500 nM. All experiments were performed in CO<sub>2</sub>-saturated 0.1 M NaHCO<sub>3</sub> and 0.1 M sodium ascorbate for four hours under visible light irradiation ( $\lambda > 400$  nm, AM 1.5G, 100 mW cm<sup>-2</sup>) in triplicates.

| [Lipid] (mM) | Lipid | T <sub>m</sub> (°C) <sup>a</sup> | CO (nmol)    | H <sub>2</sub> (nmol) | TON <sub>CO</sub> | TON <sub>H<sub>2</sub></sub> | CO selectivity (%) <sup>b</sup> |
|--------------|-------|----------------------------------|--------------|-----------------------|-------------------|------------------------------|---------------------------------|
| 100          | DLPC  | -2                               | 216.8 ± 40.3 | 49.5 ± 15.0           | 144.5 ± 26.8      | 33.0 ± 10.0                  | 81 ± 1                          |
| 100          | DPPC  | 41                               | 119.0 ± 32.3 | 14.5 ± 1.6            | 79.3 ± 21.5       | 9.7 ± 1.0                    | 89 ± 1                          |
| 100          | DMPC  | 24                               | 282.9 ± 11.2 | 51.0 ± 12.7           | 188.6 ± 7.5       | 36.4 ± 5.9                   | 84 ± 1                          |
| 200          |       |                                  | 389.3 ± 29.2 | 95.1 ± 15.5           | 259.5 ± 19.5      | 63.4 ± 10.4                  | 81 ± 1                          |
| 400          |       |                                  | 347.7 ± 28.6 | 81.8 ± 17.9           | 231.8 ± 19.0      | 12.0                         | 81 ± 1                          |

<sup>a</sup> Provided phase transition temperature values correspond only to liposomes made of exclusively the specified lipid. <sup>b</sup> CO selectivity (%) =  $n_{\text{CO}} / (n_{\text{CO}} + n_{\text{H}_2}) \times 100$ .

## Tabulated information from photoinduced charge-transfer dynamics investigations

**Table S14.** (First row) Bimolecular quenching reaction rate constant ( $K_q$ ) for **RuPS<sub>w</sub>** and NaHAsc, and association constant ( $K_A$ ) for **RuPS<sub>L</sub>** in DMPC liposomes and NaHAsc. (Second row) Time constants obtained from fitting of emission decay at 650 nm of photoexcited **RuPS<sub>w</sub>** and **RuPS<sub>L</sub>** (in various mole ratios with DMPC) in the absence of NaHAsc. (Third row) Time constants and contribution (in %) at 500 nm of photocatalytic system with **NiT<sub>w</sub>** and **NiT<sub>L</sub>** in various concentrations. (Fourth row) Electron transfer rates in homogeneous and liposomes. N.B. for further details see Supplementary Note 5 in section above.

| Reductive quenching electron transfer |                    |
|---------------------------------------|--------------------|
| $K_q$ ( $M^{-1} s^{-1}$ )             | $K_A$ ( $M^{-1}$ ) |
| $3.7 \cdot 10^7$                      | 31                 |

| Charge separation quantum yield |      |
|---------------------------------|------|
| Homogeneous $\Phi_{ET}$         | 35 % |
| Liposome $\Phi_{ET}$            | 6 %  |

| PS-PS self-quenching (in the absence of NaHAsc) |                                         |                                         |
|-------------------------------------------------|-----------------------------------------|-----------------------------------------|
| <b>RuPS<sub>w</sub></b>                         | $\tau_1$ (ns) / ( $a_1$ %)              |                                         |
|                                                 | 600 (100)                               |                                         |
| <b>DMPC/RuPS<sub>L</sub> (mole ratios)</b>      | $\tau_1$ (ns) / ( $a_1$ %) <sup>a</sup> | $\tau_2$ (ns) / ( $a_2$ %) <sup>b</sup> |
| 10:1                                            | 8 (85)                                  | 251 (15)                                |
| 20:1                                            | 12 (36)                                 | 298 (64)                                |
| 40:1                                            | 12 (22)                                 | 377 (78)                                |

| Time constants and contributions obtained from kinetic traces |                                                |                                   |                  |                                   |                                   |                     |
|---------------------------------------------------------------|------------------------------------------------|-----------------------------------|------------------|-----------------------------------|-----------------------------------|---------------------|
| NiT <sub>w</sub>                                              |                                                |                                   | NiT <sub>L</sub> |                                   |                                   |                     |
| Concentration                                                 | $\tau_1$ ( $\mu s$ ) / ( $a_1$ %) <sup>c</sup> | $\tau_2$ ( $\mu s$ ) / ( $a_2$ %) | Concentration    | $\tau_1$ ( $\mu s$ ) / ( $a_1$ %) | $\tau_2$ ( $\mu s$ ) / ( $a_2$ %) | Offset / ( $a_3$ %) |
| 0 $\mu M$                                                     | 18.5 (100)                                     | -                                 | 0 $\mu M$        | 28 (37)                           | 330 (20)                          | (43)                |
| 100 $\mu M$                                                   | 3.5 (77)                                       | 19.0 (23)                         | 0.5 $\mu M$      | 22.8 (53)                         | 195 (20)                          | (27)                |
| 200 $\mu M$                                                   | 2.0 (78)                                       | 25 (22)                           | 2 $\mu M$        | 12.2 (67)                         | 100 (20)                          | (13)                |
| 300 $\mu M$                                                   | 1.5 (77)                                       | 28 (23)                           | 5 $\mu M$        | 7.4 (57)                          | 80 (25)                           | (18)                |

| One-electron reduction rate constants of Liposome-immobilized and water-soluble catalysts |                              |
|-------------------------------------------------------------------------------------------|------------------------------|
| Catalyst                                                                                  | $K_{ET}$ ( $M^{-1} s^{-1}$ ) |
| NiT <sub>L</sub>                                                                          | $2.00 \cdot 10^{10}$         |
| NiT <sub>w</sub>                                                                          | $2.16 \cdot 10^9$            |
| CoP <sub>w</sub>                                                                          | $1.31 \cdot 10^{10}$         |
| CoT <sub>w</sub>                                                                          | $2.67 \cdot 10^9$            |
| NiP <sub>w</sub>                                                                          | $2.00 \cdot 10^{10}$         |
| FeT <sub>w</sub>                                                                          | $2.30 \cdot 10^9$            |
| FeP <sub>w</sub>                                                                          | $3.00 \cdot 10^{10}$         |

$a_1$  % and  $a_2$  % stand for amplitude of data fitting in %.  $a_3$  stands for the offset amplitude of very long-live components. <sup>a</sup> percent contribution of the short lifetime, obtained from a biexponential decay function, and associated with self-quenching processes. <sup>b</sup> percent contribution of the long lifetime, obtained from a biexponential decay function, and associated with normal lifetime of photoexcited Ru(II). <sup>c</sup> percent contribution of short-lifetime components related to electron transfer rates with different catalyst concentrations.

## Electrochemistry results of electrode-immobilized catalysts in aqueous conditions

**Table S15.** Summary of results obtained from four hours of chronoamperometry of GCE with different alkylated molecular catalysts and FTO electrodes with **CoP<sub>L</sub>** at an applied potential of  $-0.9$  V vs SHE. Measurements were carried out in CO<sub>2</sub>-saturated 0.1 M NaHCO<sub>3</sub> solutions (pH = 6.7). All experiments were performed in triplicates and the average metrics are presented. Observed faradaic yield values are consistent with reported values for analogous homogeneous catalysts<sup>13</sup>.

| Catalysts             | Gaseous products<br>( $\mu\text{mol cm}^{-2}$ ) |                | CO Selectivity<br>(%) <sup>a</sup> | Charge<br>passed<br>( $\text{C cm}^{-2}$ ) | Faradaic efficiency (FE, %) |                             |                                |
|-----------------------|-------------------------------------------------|----------------|------------------------------------|--------------------------------------------|-----------------------------|-----------------------------|--------------------------------|
|                       | CO                                              | H <sub>2</sub> |                                    |                                            | FE <sub>CO</sub>            | FE <sub>H<sub>2</sub></sub> | FE <sub>CO+H<sub>2</sub></sub> |
| GCE CoP <sub>L</sub>  | 0.16 ±<br>0.04                                  | 0.06 ±<br>0.02 | 74 ± 4                             | 0.07 ± 0.02                                | 50.8 ±<br>13.4              | 17.0 ±<br>1.1               | 67.8 ±<br>14.5                 |
| FTO CoP <sub>L</sub>  | 0.07 ±<br>0.03                                  | 0.54 ±<br>0.57 | 11 ± 5                             | 0.23 ± 0.12                                | 2.5 ± 1.4                   | 42.7 ±<br>27.5              | 45.2 ±<br>28.2                 |
| GCE CoT <sub>L</sub>  | 0.04 ±<br>0.01                                  | 0.14 ±<br>0.11 | 25 ± 9                             | 0.09 ± 0.02                                | 7.4 ± 0.6                   | 26.7 ±<br>16.6              | 34.1 ±<br>16.9                 |
| GCE NiP <sub>L</sub>  | 0.02 ±<br>0.01                                  | 0.22 ±<br>0.11 | 12 ± 9                             | 0.08 ± 0.03                                | 3.6 ± 2.9                   | 50.5 ±<br>13.3              | 54.1 ±<br>10.8                 |
| GCE NiT <sub>L</sub>  | 0.02 ±<br>0.01                                  | 0.99 ±<br>0.34 | 2 ± 1                              | 0.35 ± 0.15                                | 0.9 ± 0.3                   | 55.6 ±<br>6.1               | 56.5 ± 6.2                     |
| GCE FeP <sub>L</sub>  | 0.03 ±<br>0.02                                  | 0.08 ±<br>0.04 | 30 ± 9                             | 0.09 ± 0.08                                | 8.0 ± 3.0                   | 19.4 ±<br>6.1               | 27.4 ± 6.6                     |
| GCE FeT <sub>L</sub>  | 0.01 ±<br>0.01                                  | 0.13 ±<br>0.08 | 12 ± 10                            | 0.11 ± 0.08                                | 3.6 ± 2.8                   | 25.4 ±<br>9.3               | 29.0 ± 9.8                     |
| Bare GCE <sub>b</sub> | n. d. <sup>c</sup>                              | 0.58 ±<br>0.52 | -                                  | 0.16 ± 0.12                                | -                           | 65.0 ±<br>10.2              | 65.0 ±<br>10.2                 |
| Bare FTO              | 0.01 ±<br>0.01                                  | 0.77 ±<br>0.14 | 1 ± 1                              | 0.25 ± 0.04                                | 0.6 ± 0.3                   | 60.8 ±<br>16.5              | 61.4 ±<br>16.7                 |

<sup>a</sup> CO selectivity (%) =  $n_{\text{CO}} / (n_{\text{CO}} + n_{\text{H}_2}) \times 100$ . <sup>b</sup> CO was not detected in the headspace gas when no alkylated catalyst was drop-casted on the GCE electrode. <sup>c</sup> "n.d." stands for not detected.

## Summary of experimental and calculated resonance Raman data

**Table S16.** Summary of experimental resonance Raman peaks. For summary of atom labeling see below Scheme S5.

| This work                                                                   |         |         |         |      |      | Terekhov <sup>11</sup>                       |                                               | Assignment <sup>c</sup>                                                            |
|-----------------------------------------------------------------------------|---------|---------|---------|------|------|----------------------------------------------|-----------------------------------------------|------------------------------------------------------------------------------------|
| FTO CoP <sub>L</sub> in CO <sub>2</sub> -saturated 0.1 M NaHCO <sub>3</sub> |         |         |         |      |      | Co <sup>II</sup> P <sub>w</sub> <sup>a</sup> | Co <sup>III</sup> P <sub>w</sub> <sup>b</sup> |                                                                                    |
| +0.7 V                                                                      | -0.1 V  | -0.3 V  | -0.5    | -0.7 | -0.9 |                                              |                                               |                                                                                    |
| 1635                                                                        | 1635    | 1636    | 1638    | 1634 | 1635 | 1643                                         | 1644                                          | v(pyr), A <sub>1g</sub>                                                            |
| 1599                                                                        | 1599    | 1599    | 1599    |      |      |                                              | 1597                                          | v(C <sub>β</sub> C <sub>β</sub> + C <sub>α</sub> C <sub>m</sub> ), B <sub>1g</sub> |
| 1575                                                                        | 1573    | 1574    | 1575    |      |      | 1573                                         | 1579                                          | v(C <sub>β</sub> C <sub>β</sub> + C <sub>α</sub> C <sub>m</sub> ), A <sub>1g</sub> |
| 1508                                                                        |         |         | 1506    | 1510 | 1510 |                                              | 1516                                          | v(C <sub>β</sub> C <sub>β</sub> ), B <sub>1g</sub>                                 |
|                                                                             |         |         | 1471    | 1470 | 1472 | 1467                                         | 1475                                          | v <sub>s</sub> (C <sub>α</sub> C <sub>β</sub> ), A <sub>1g</sub>                   |
|                                                                             |         |         |         | 1382 | 1383 |                                              | 1372                                          | v <sub>s</sub> (C <sub>α</sub> N), A <sub>1g</sub>                                 |
| 1363                                                                        | 1362    | 1360    | 1362    | 1369 | 1366 | 1367                                         |                                               | v <sub>s</sub> (C <sub>α</sub> N), A <sub>1g</sub>                                 |
| 1342                                                                        | 1337    | 1336    | 1332    | 1323 | 1323 |                                              |                                               | τ(CH <sub>2</sub> ) / δ(CH <sub>3</sub> ) <sup>11</sup>                            |
|                                                                             |         | 1240    | 1240    |      |      | 1253                                         | 1257                                          | v(C <sub>m</sub> -pyr), A <sub>1g</sub>                                            |
| 1217                                                                        | 1218    | 1218    | 1218    | 1213 | 1211 | 1220                                         | 1221                                          | δ(pyr), A <sub>1g</sub>                                                            |
|                                                                             |         |         |         | 1194 | 1195 | 1192                                         | 1192                                          | δ(pyr), v(N <sup>+</sup> -CH <sub>3</sub> /alkyl)                                  |
| 1092                                                                        | 1091    | 1092    | 1092    | 1090 | 1087 | 1098                                         | 1101                                          | δ <sub>s</sub> (C <sub>β</sub> H), A <sub>1g</sub>                                 |
|                                                                             |         |         |         |      |      | 1057                                         | 1057                                          | pyr δ(CH), A <sub>1g</sub>                                                         |
| 1007                                                                        | 1007    | 1007    | 1007    | 1007 | 1007 | 1008(sh)                                     | 1008                                          | v <sub>s</sub> (C <sub>α</sub> C <sub>m</sub> ), A <sub>1g</sub>                   |
| 990(sh)                                                                     | 990(sh) | 990(sh) | 990(sh) |      |      | 998                                          |                                               | v <sub>s</sub> (C <sub>α</sub> C <sub>m</sub> ), A <sub>1g</sub>                   |
| 908                                                                         | 906     | 906     | 907     | 901  | 900  | 906                                          | 907                                           | δ <sub>s</sub> (por), A <sub>1g</sub>                                              |
| 667                                                                         | 662     | 662     | 664     | 667  | 667  |                                              | 665                                           | δ(pyr) + δ(C-N <sup>+</sup> -CH <sub>3</sub> /alkyl), A <sub>1g</sub>              |

<sup>a</sup> measured in water at pH 7. <sup>b</sup> measured in water at pH 8. <sup>c</sup> Assignments based on literature.<sup>11</sup> Por = porphyrin ring, pyr = N-pyridinium ring, sh = shoulder, v = stretching, δ = bending, τ = twisting, s = symmetric (subscript).

**Table S17.** Selection of experimental frequencies ( $\text{cm}^{-1}$ ) of FTO|CoP<sub>L</sub> at +0.7 and -0.9 V vs SHE in CO<sub>2</sub>-saturated 0.1 M NaHCO<sub>3</sub> and calculated frequencies for [CoP]<sup>4+</sup>, [CoP(H<sub>2</sub>O)]<sup>4+</sup>, [CoP(H<sub>2</sub>O)]<sup>0</sup> and [CoP(CO)]<sup>0</sup> and their proposed assigned vibrational modes. Experimental and calculated peaks are shown in Figures S44-46. The proposed assignments are based on calculated vibrational modes for each calculated structure for the selected Raman peaks. For summary of atom labeling see Scheme S5. N.B. for further details see Supplementary Note 7 in section above.

| Experimental         |        | Calculated             |                                       |                                               | Proposed assignment                           |                                                                     |
|----------------------|--------|------------------------|---------------------------------------|-----------------------------------------------|-----------------------------------------------|---------------------------------------------------------------------|
| FTO CoP <sub>L</sub> |        | [CoP] <sup>4+</sup>    | [CoP(H <sub>2</sub> O)] <sup>4+</sup> | [CoP(H <sub>2</sub> O)] <sup>0</sup>          | [CoP(CO)] <sup>0</sup>                        |                                                                     |
| +0.7 V               | -0.9 V |                        |                                       |                                               |                                               |                                                                     |
| -                    | 1007   | -                      | -                                     | 981, 984, 988, 992                            | 981, 984, 989, 991                            | $\delta_s(\text{pyr})$                                              |
|                      |        |                        |                                       | 998, 1000, 1001, 1003, 1008, 1016, 1018, 1022 | 997, 1000, 1001, 1004, 1008, 1018, 1019, 1024 | $\delta(\text{pyr})$ ,<br>$\delta(\text{Por})$                      |
|                      |        |                        |                                       | 1034, 1035,                                   | 1036, 1037,                                   | $\delta_{as}(\text{pyr})$ ,<br>$r(\text{N}^+-\text{CH}_3)$          |
|                      |        |                        |                                       | 1038, 1040, 1042, 1044,                       | 1039, 1040, 1043, 1045,                       | $r(\text{N}^+-\text{CH}_3)$ ,<br>$\delta_s(\text{C}_\beta\text{H})$ |
|                      |        |                        |                                       | 1056, 1058                                    | 1058, 1058                                    | $\delta_s(\text{C}_\beta\text{H})$                                  |
| 1599                 | -      | 1622, 1623, 1623, 1625 | 1623, 1623, 1623, 1626                | -                                             | -                                             | $\nu_s(\text{pyr})$                                                 |

Por = porphyrin ring, pyr = N-pyridinium ring, v = stretching,  $\delta$  = bending, r = rocking, s = symmetric (subscript), as = asymmetric (subscript).

## Tabulated Gibbs free energy of all calculated species

**Table S18.** Gibbs free energy of the calculated cobalt porphyrin complexes **CoP**, organized by the different co-absorbed ligands and at distinct oxidation states, with respect to **[CoP]<sup>4+</sup>**. Electron transfer energies were referenced by the **[Ru(bpy)<sub>3</sub>]<sup>2+</sup>/[Ru(bpy)<sub>3</sub>]<sup>1+</sup>** redox cycle and proton transfer energies were calculated from the free energy of a free proton in H<sub>2</sub>O (−272.2 kcal mol<sup>−1</sup>).<sup>33-35</sup> N.B. for further details see Supplementary Note 7 in section above.

| Compound                              | $\Delta G$ [Kcal mol <sup>−1</sup> ] |
|---------------------------------------|--------------------------------------|
| [CoP] <sup>5+</sup>                   | 62.7                                 |
| [CoP] <sup>4+</sup>                   | 0.0                                  |
| [CoP] <sup>3+</sup>                   | −14.6                                |
| [CoP] <sup>2+</sup>                   | −26.3                                |
| [CoP] <sup>1+</sup>                   | −37.1                                |
| [CoP] <sup>0</sup>                    | −39.8                                |
| [CoP] <sup>1−</sup>                   | −38.8                                |
| [CoP] <sup>2−</sup>                   | −30.8                                |
|                                       |                                      |
| [CoP(CO <sub>2</sub> )] <sup>3+</sup> | 1.2                                  |
| [CoP(CO <sub>2</sub> )] <sup>2+</sup> | −6.7                                 |
| [CoP(CO <sub>2</sub> )] <sup>1+</sup> | −22.9                                |
| [CoP(CO <sub>2</sub> )] <sup>0</sup>  | −26.6                                |
| [CoP(CO <sub>2</sub> )] <sup>1−</sup> | −28.4                                |
| [CoP(CO <sub>2</sub> )] <sup>2−</sup> | −23.9                                |
|                                       |                                      |
| [CoP(H <sub>2</sub> O)] <sup>5+</sup> | 56.8                                 |
| [CoP(H <sub>2</sub> O)] <sup>4+</sup> | −3.2                                 |
| [CoP(H <sub>2</sub> O)] <sup>3+</sup> | −12.5                                |
| [CoP(H <sub>2</sub> O)] <sup>2+</sup> | −31.8                                |
| [CoP(H <sub>2</sub> O)] <sup>1+</sup> | −37.8                                |
| [CoP(H <sub>2</sub> O)] <sup>0</sup>  | −42.3                                |
| [CoP(H <sub>2</sub> O)] <sup>1−</sup> | −45.4                                |
|                                       |                                      |
| [CoP(COOH)] <sup>4+</sup>             | −0.3                                 |
| [CoP(COOH)] <sup>3+</sup>             | −14.1                                |
| [CoP(COOH)] <sup>2+</sup>             | −37.1                                |
| [CoP(COOH)] <sup>1+</sup>             | −44.9                                |
| [CoP(COOH)] <sup>0</sup>              | −49.7                                |
| [CoP(COOH)] <sup>1−</sup>             | −43.5                                |
|                                       |                                      |
| [CoP(CO)] <sup>4+</sup>               | −43.6                                |
| [CoP(CO)] <sup>2+</sup>               | −69.7                                |
| [CoP(CO)] <sup>1+</sup>               | −75.3                                |
| [CoP(CO)] <sup>0</sup>                | −79.7                                |
| [CoP(CO)] <sup>1−</sup>               | −80.4                                |
|                                       |                                      |
| [CoP(H)] <sup>4+</sup>                | 13.2                                 |
| [CoP(H)] <sup>3+</sup>                | −20.1                                |
| [CoP(H)] <sup>2+</sup>                | −38.3                                |
| [CoP(H)] <sup>1+</sup>                | −45.5                                |
| [CoP(H)] <sup>0+</sup>                | −48.6                                |
| [CoP(H)] <sup>1−</sup>                | −50.8                                |

**Table S19.** Gibbs free energy of the calculated cobalt porphyrin complexes **CoP**, at different oxidation state and containing different co-absorbed ligands, with respect to  $[\text{CoP}_L]^{+4}$ . Electron transfer energies were referenced by the  $[\text{Ru}(\text{bpy})_3]^{2+}/[\text{Ru}(\text{bpy})_3]^{1+}$  redox cycle and proton transfer energies were calculated from the free energy of a free proton in  $\text{H}_2\text{O}$  ( $-272.2 \text{ kcal mol}^{-1}$ ).<sup>33-35</sup>

| Compound                                | $\Delta G [\text{Kcal mol}^{-1}]$ |
|-----------------------------------------|-----------------------------------|
| $[\text{CoP}]^{5+}$                     | 62.7                              |
| $[\text{CoP}(\text{H}_2\text{O})]^{5+}$ | 56.8                              |
| $[\text{CoP}]^{4+}$                     | 0.0                               |
| $[\text{CoP}(\text{H}_2\text{O})]^{4+}$ | -3.2                              |
| $[\text{CoP}]^{3+}$                     | -14.6                             |
| $[\text{CoP}(\text{H}_2\text{O})]^{3+}$ | -12.5                             |
| $[\text{CoP}(\text{CO}_2)]^{3+}$        | 1.2                               |
| $[\text{CoP}(\text{COOH})]^{4+}$        | -0.3                              |
| $[\text{CoP}(\text{H})]^{4+}$           | 13.2                              |
| $[\text{CoP}]^{2+}$                     | -26.3                             |
| $[\text{CoP}(\text{H}_2\text{O})]^{2+}$ | -31.8                             |
| $[\text{CoP}(\text{CO}_2)]^{2+}$        | -6.7                              |
| $[\text{CoP}(\text{COOH})]^{3+}$        | -14.1                             |
| $[\text{CoP}(\text{CO})]^{4+}$          | -43.6                             |
| $[\text{CoP}(\text{H})]^{3+}$           | -20.1                             |
| $[\text{CoP}]^{1+}$                     | -37.1                             |
| $[\text{CoP}(\text{H}_2\text{O})]^{1+}$ | -37.8                             |
| $[\text{CoP}(\text{CO}_2)]^{1+}$        | -22.9                             |
| $[\text{CoP}(\text{COOH})]^{2+}$        | -37.1                             |
| $[\text{CoP}(\text{H})]^{2+}$           | -38.3                             |
| $[\text{CoP}]^0$                        | -39.8                             |
| $[\text{CoP}(\text{H}_2\text{O})]^0$    | -42.3                             |
| $[\text{CoP}(\text{CO}_2)]^0$           | -26.6                             |
| $[\text{CoP}(\text{COOH})]^{1+}$        | -44.9                             |
| $[\text{CoP}(\text{CO})]^{2+}$          | -69.7                             |
| $[\text{CoP}(\text{H})]^{1+}$           | -45.5                             |
| $[\text{CoP}]^{1-}$                     | -38.8                             |
| $[\text{CoP}(\text{H}_2\text{O})]^{1-}$ | -45.4                             |
| $[\text{CoP}(\text{CO}_2)]^{1-}$        | -28.4                             |
| $[\text{CoP}(\text{COOH})]^0$           | -49.7                             |
| $[\text{CoP}(\text{CO})]^{1+}$          | -75.3                             |
| $[\text{CoP}(\text{H})]^0$              | -48.6                             |
| $[\text{CoP}]^{2-}$                     | -30.8                             |
| $[\text{CoP}(\text{CO}_2)]^{2-}$        | -23.9                             |
| $[\text{CoP}(\text{COOH})]^{1-}$        | -43.5                             |
| $[\text{CoP}(\text{CO})]^0$             | -79.7                             |
| $[\text{CoP}(\text{H})]^{1-}$           | -50.8                             |
| $[\text{CoP}(\text{CO})]^{1-}$          | -80.4                             |



**Table S20.** Electronic energies and Gibbs free energy corrections of small molecules,  $[\text{Ru}(\text{bpy})_3]^{2+/1+}$  and cobalt porphyrin complexes (based on computed **CoP** structures). Different spin states were calculated with  $M = 2S + 1$  with  $S$  being the number of unpaired electrons. Energies are given in Hartree atomic units.

| Compound                         | M | 6-31G*         |              |               | 6-311++G(3df,3pd) |               |
|----------------------------------|---|----------------|--------------|---------------|-------------------|---------------|
|                                  |   | G Corr. [a.u.] | G [a.u.]     | G [a.u.] (1M) | Eel [a.u.]        | G [a.u.] (1M) |
| $[\text{Ru}(\text{bpy})_3]^{+1}$ | 2 | 0.419876       | -1580.764845 | -1580.761833  | -1581.642759      | -1581.219871  |
| $[\text{Ru}(\text{bpy})_3]^{+2}$ | 1 | 0.42648        | -1580.648686 | -1580.645674  | -1581.531323      | -1581.101831  |
| $\text{CO}_2$                    | 1 | -0.009236      | -188.599743  | -188.5967311  | -188.6627292      | -188.6689533  |
| CO                               | 1 | -0.014111      | -113.32173   | -113.3187181  | -113.3571505      | -113.3682496  |
| $\text{H}_2\text{O}$             | 1 | 0.002667       | -76.427248   | -76.42423609  | -76.4711115       | -76.46543259  |
| $[\text{CoP}]^{+5}$              | 1 | 0.639596       | -2280.92664  | -2280.923628  | -2282.253796      | -2281.611188  |
| $[\text{CoP}]^{+5}$              | 3 | 0.63777        | -2280.928838 | -2280.925826  | -2282.254029      | -2281.613247  |
| $[\text{CoP}]^{+5}$              | 5 | 0.628689       | -2280.870717 | -2280.867705  | -2282.186365      | -2281.554664  |
| $[\text{CoP}]^{+4}$              | 2 | 0.639532       | -2281.14158  | -2281.138568  | -2282.473743      | -2281.831199  |
| $[\text{CoP}]^{+4}$              | 4 | 0.634925       | -2281.086733 | -2281.083721  | -2282.412466      | -2281.77453   |
| $[\text{CoP}]^{+3}$              | 1 | 0.640622       | -2281.230188 | -2281.227176  | -2282.56636       | -2281.922726  |
| $[\text{CoP}]^{+3}$              | 3 | 0.638331       | -2281.277746 | -2281.274734  | -2282.613901      | -2281.972558  |
| $[\text{CoP}]^{+3}$              | 5 | 0.635541       | -2281.229048 | -2281.226036  | -2282.561084      | -2281.922531  |
| $[\text{CoP}]^{+2}$              | 2 | 0.637201       | -2281.406607 | -2281.403595  | -2282.749417      | -2282.109204  |
| $[\text{CoP}]^{+2}$              | 4 | 0.635189       | -2281.405818 | -2281.402806  | -2282.745271      | -2282.107071  |
| $[\text{CoP}]^{+2}$              | 6 | 0.632136       | -2281.361726 | -2281.358714  | -2282.695844      | -2282.060696  |
| $[\text{CoP}]^{+2}$              | 8 | 0.628564       | -2281.360361 | -2281.357349  | -2282.690377      | -2282.058801  |
| $[\text{CoP}]^{+1}$              | 1 | 0.633737       | -2281.533837 | -2281.530825  | -2282.880132      | -2282.243383  |
| $[\text{CoP}]^{+1}$              | 3 | 0.632564       | -2281.534883 | -2281.531871  | -2282.880022      | -2282.244446  |
| $[\text{CoP}]^{+1}$              | 5 | 0.631462       | -2281.524856 | -2281.521844  | -2282.866913      | -2282.232439  |
| $[\text{CoP}]^0$                 | 2 | 0.630162       | -2281.646589 | -2281.643577  | -2282.997533      | -2282.36436   |
| $[\text{CoP}]^0$                 | 4 | 0.629637       | -2281.6469   | -2281.643888  | -2282.997363      | -2282.364714  |
| $[\text{CoP}]^0$                 | 6 | 0.626205       | -2281.649252 | -2281.64624   | -2282.995991      | -2282.366774  |
| $[\text{CoP}]^0$                 | 8 | 0.619691       | -2281.603781 | -2281.600769  | -2282.946054      | -2282.323351  |
| $[\text{CoP}]^{-1}$              | 1 | 0.629284       | -2281.753873 | -2281.750861  | -2283.115455      | -2282.483159  |
| $[\text{CoP}]^{-1}$              | 3 | 0.6246         | -2281.744998 | -2281.741986  | -2283.10158       | -2282.473968  |

|                     |   |          |              |              |              |              |
|---------------------|---|----------|--------------|--------------|--------------|--------------|
| [CoP] <sup>-1</sup> | 5 | 0.624134 | -2281.745541 | -2281.742529 | -2283.101667 | -2282.474521 |
|---------------------|---|----------|--------------|--------------|--------------|--------------|

|                                     |   |          |              |              |              |              |
|-------------------------------------|---|----------|--------------|--------------|--------------|--------------|
| [CoP] <sup>-2</sup>                 | 2 | 0.62087  | -2281.792174 | -2281.789162 | -2283.158744 | -2282.534862 |
| [CoP] <sup>-2</sup>                 | 4 | 0.621241 | -2281.823866 | -2281.820854 | -2283.191842 | -2282.567589 |
| [CoP] <sup>-2</sup> _2 <sup>a</sup> | 4 | 0.623083 | -2281.841033 | -2281.838021 | -2283.204081 | -2282.577987 |
| [CoP] <sup>-2</sup> _3 <sup>a</sup> | 4 | 0.621719 | -2281.847494 | -2281.844482 | -2283.213291 | -2282.58856  |
| [CoP] <sup>-2</sup>                 | 6 | 0.613778 | -2281.791201 | -2281.788189 | -2283.154059 | -2282.537269 |
| [CoP] <sup>-2</sup> _2 <sup>a</sup> | 6 | 0.611804 | -2281.776743 | -2281.773731 | -2283.134612 | -2282.519796 |
| [CoP] <sup>-2</sup>                 | 8 | 0.612877 | -2281.781341 | -2281.778329 | -2283.140792 | -2282.524903 |
| [CoP] <sup>-2</sup> _2 <sup>a</sup> | 8 | 0.613056 | -2281.786812 | -2281.7838   | -2283.14984  | -2282.533772 |

|                                                       |   |          |              |              |              |              |
|-------------------------------------------------------|---|----------|--------------|--------------|--------------|--------------|
| [CoP(CO <sub>2</sub> )] <sup>+3</sup>                 | 1 | 0.645536 | -2469.841898 | -2469.838886 | -2471.264788 | -2470.61624  |
| [CoP(CO <sub>2</sub> )] <sup>+3</sup> _2 <sup>a</sup> | 1 | 0.646858 | -2469.840583 | -2469.837571 | -2471.264831 | -2470.614961 |

|                                       |   |          |              |              |              |              |
|---------------------------------------|---|----------|--------------|--------------|--------------|--------------|
| [CoP(CO <sub>2</sub> )] <sup>+2</sup> | 2 | 0.643547 | -2469.966783 | -2469.963771 | -2471.393515 | -2470.746956 |
| [CoP(CO <sub>2</sub> )] <sup>+2</sup> | 4 | 0.641631 | -2469.914513 | -2469.911501 | -2471.337056 | -2470.692413 |

|                                       |   |          |              |              |              |              |
|---------------------------------------|---|----------|--------------|--------------|--------------|--------------|
| [CoP(CO <sub>2</sub> )] <sup>+1</sup> | 1 | 0.643738 | -2470.100563 | -2470.097551 | -2471.537546 | -2470.890797 |
| [CoP(CO <sub>2</sub> )] <sup>+1</sup> | 3 | 0.642296 | -2470.087598 | -2470.084586 | -2471.520579 | -2470.875271 |

|                                      |   |          |              |              |              |              |
|--------------------------------------|---|----------|--------------|--------------|--------------|--------------|
| [CoP(CO <sub>2</sub> )] <sup>0</sup> | 2 | 0.639432 | -2470.2161   | -2470.213088 | -2471.657141 | -2471.014697 |
| [CoP(CO <sub>2</sub> )] <sup>0</sup> | 4 | 0.63721  | -2470.208676 | -2470.205664 | -2471.64484  | -2471.004618 |
| [CoP(CO <sub>2</sub> )] <sup>0</sup> | 6 | 0.633406 | -2470.201519 | -2470.198507 | -2471.628213 | -2470.991795 |

|                                       |   |          |              |              |              |              |
|---------------------------------------|---|----------|--------------|--------------|--------------|--------------|
| [CoP(CO <sub>2</sub> )] <sup>-1</sup> | 1 | 0.636746 | -2470.328067 | -2470.325055 | -2471.774966 | -2471.135208 |
| [CoP(CO <sub>2</sub> )] <sup>-1</sup> | 3 | 0.636748 | -2470.327685 | -2470.324673 | -2471.775309 | -2471.135549 |
| [CoP(CO <sub>2</sub> )] <sup>-1</sup> | 5 | 0.63267  | -2470.283968 | -2470.280956 | -2471.729099 | -2471.093417 |

|                                                       |   |          |              |              |              |              |
|-------------------------------------------------------|---|----------|--------------|--------------|--------------|--------------|
| [CoP(CO <sub>2</sub> )] <sup>-2</sup>                 | 2 | 0.628668 | -2470.411252 | -2470.40824  | -2471.854687 | -2471.223007 |
| [CoP(CO <sub>2</sub> )] <sup>-2</sup> _2 <sup>a</sup> | 2 | 0.636852 | -2470.425713 | -2470.422701 | -2471.886344 | -2471.24648  |
| [CoP(CO <sub>2</sub> )] <sup>-2</sup>                 | 4 | 0.627911 | -2470.412578 | -2470.409566 | -2471.855202 | -2471.224279 |
| [CoP(CO <sub>2</sub> )] <sup>-2</sup> _2 <sup>a</sup> | 4 | 0.630105 | -2470.396288 | -2470.393276 | -2471.852618 | -2471.219501 |
| [CoP(CO <sub>2</sub> )] <sup>-2</sup>                 | 6 | 0.625235 | -2470.354505 | -2470.351493 | -2471.807457 | -2471.17921  |

|                                       |   |          |             |              |              |              |
|---------------------------------------|---|----------|-------------|--------------|--------------|--------------|
| [CoP(H <sub>2</sub> O)] <sup>+5</sup> | 1 | 0.666432 | -2357.34183 | -2357.338818 | -2358.741449 | -2358.072005 |
| [CoP(H <sub>2</sub> O)] <sup>+5</sup> | 3 | 0.663862 | -2357.35696 | -2357.353948 | -2358.755023 | -2358.088149 |

|                                       |   |          |              |              |              |              |
|---------------------------------------|---|----------|--------------|--------------|--------------|--------------|
| [CoP(H <sub>2</sub> O)] <sup>+4</sup> | 2 | 0.659701 | -2357.567227 | -2357.564215 | -2358.964467 | -2358.301754 |
| [CoP(H <sub>2</sub> O)] <sup>+4</sup> | 4 | 0.657861 | -2357.507223 | -2357.504211 | -2358.902343 | -2358.241471 |

|                                       |   |          |              |              |              |              |
|---------------------------------------|---|----------|--------------|--------------|--------------|--------------|
| [CoP(H <sub>2</sub> O)] <sup>+3</sup> | 1 | 0.662225 | -2357.644018 | -2357.641006 | -2359.048726 | -2358.383489 |
| [CoP(H <sub>2</sub> O)] <sup>+3</sup> | 3 | 0.659132 | -2357.695277 | -2357.692265 | -2359.096754 | -2358.43461  |

|                                       |   |          |              |              |              |            |
|---------------------------------------|---|----------|--------------|--------------|--------------|------------|
| [CoP(H <sub>2</sub> O)] <sup>+3</sup> | 5 | 0.656354 | -2357.646604 | -2357.643592 | -2359.043866 | -2358.3845 |
|---------------------------------------|---|----------|--------------|--------------|--------------|------------|

|                                       |   |          |              |              |              |              |
|---------------------------------------|---|----------|--------------|--------------|--------------|--------------|
| [CoP(H <sub>2</sub> O)] <sup>+2</sup> | 2 | 0.658526 | -2357.835681 | -2357.832669 | -2359.244953 | -2358.583415 |
| [CoP(H <sub>2</sub> O)] <sup>+2</sup> | 4 | 0.655717 | -2357.820999 | -2357.817987 | -2359.225629 | -2358.566901 |
| [CoP(H <sub>2</sub> O)] <sup>+2</sup> | 6 | 0.652758 | -2357.784473 | -2357.781461 | -2359.184191 | -2358.528421 |

|                                       |   |          |              |              |              |              |
|---------------------------------------|---|----------|--------------|--------------|--------------|--------------|
| [CoP(H <sub>2</sub> O)] <sup>+1</sup> | 1 | 0.654963 | -2357.954881 | -2357.951869 | -2359.367891 | -2358.709916 |
| [CoP(H <sub>2</sub> O)] <sup>+1</sup> | 3 | 0.653946 | -2357.955913 | -2357.952901 | -2359.367897 | -2358.710939 |
| [CoP(H <sub>2</sub> O)] <sup>+1</sup> | 5 | 0.651049 | -2357.947967 | -2357.944955 | -2359.355105 | -2358.701045 |

|                                                    |   |          |              |              |              |              |
|----------------------------------------------------|---|----------|--------------|--------------|--------------|--------------|
| [CoP(H <sub>2</sub> O)] <sup>0</sup>               | 2 | 0.650292 | -2358.071796 | -2358.068784 | -2359.488601 | -2358.835297 |
| [CoP(H <sub>2</sub> O)] <sup>0</sup>               | 4 | 0.649778 | -2358.072633 | -2358.069621 | -2359.488919 | -2358.836129 |
| [CoP(H <sub>2</sub> O)] <sup>0_2<sup>a</sup></sup> | 4 | 0.649756 | -2358.072166 | -2358.069154 | -2359.488483 | -2358.835715 |
| [CoP(H <sub>2</sub> O)] <sup>0</sup>               | 8 | 0.642383 | -2358.02003  | -2358.017018 | -2359.428112 | -2358.782717 |

|                                       |   |          |              |              |              |              |
|---------------------------------------|---|----------|--------------|--------------|--------------|--------------|
| [CoP(H <sub>2</sub> O)] <sup>-1</sup> | 1 | 0.648963 | -2358.181713 | -2358.178701 | -2359.610198 | -2358.958223 |
| [CoP(H <sub>2</sub> O)] <sup>-1</sup> | 3 | 0.647951 | -2358.182717 | -2358.179705 | -2359.610192 | -2358.959229 |

|                           |   |          |              |              |              |              |
|---------------------------|---|----------|--------------|--------------|--------------|--------------|
| [CoP(COOH)] <sup>+4</sup> | 1 | 0.660773 | -2470.280545 | -2470.277533 | -2471.716236 | -2471.052451 |
| [CoP(COOH)] <sup>+4</sup> | 3 | 0.658585 | -2470.219866 | -2470.216854 | -2471.649981 | -2470.988384 |

|                           |   |          |              |              |              |              |
|---------------------------|---|----------|--------------|--------------|--------------|--------------|
| [CoP(COOH)] <sup>+3</sup> | 2 | 0.658449 | -2470.416878 | -2470.413866 | -2471.853905 | -2471.192444 |
| [CoP(COOH)] <sup>+3</sup> | 4 | 0.656098 | -2470.362741 | -2470.359729 | -2471.795654 | -2471.136544 |

|                           |   |          |              |              |              |              |
|---------------------------|---|----------|--------------|--------------|--------------|--------------|
| [CoP(COOH)] <sup>+2</sup> | 1 | 0.656065 | -2470.562898 | -2470.559886 | -2472.006141 | -2471.347064 |
| [CoP(COOH)] <sup>+2</sup> | 3 | 0.656393 | -2470.549653 | -2470.546641 | -2471.990896 | -2471.331492 |
| [CoP(COOH)] <sup>+2</sup> | 5 | 0.652261 | -2470.509375 | -2470.506363 | -2471.944745 | -2471.289472 |

|                           |   |          |              |              |              |              |
|---------------------------|---|----------|--------------|--------------|--------------|--------------|
| [CoP(COOH)] <sup>+1</sup> | 2 | 0.654419 | -2470.686402 | -2470.68339  | -2472.135062 | -2471.477631 |
| [CoP(COOH)] <sup>+1</sup> | 4 | 0.653413 | -2470.674846 | -2470.671834 | -2472.12036  | -2471.463935 |
| [CoP(COOH)] <sup>+1</sup> | 6 | 0.6473   | -2470.663133 | -2470.660121 | -2472.103481 | -2471.453169 |

|                          |   |          |              |              |              |              |
|--------------------------|---|----------|--------------|--------------|--------------|--------------|
| [CoP(COOH)] <sup>0</sup> | 1 | 0.65222  | -2470.802369 | -2470.799357 | -2472.257064 | -2471.601832 |
| [CoP(COOH)] <sup>0</sup> | 3 | 0.651219 | -2470.803751 | -2470.800739 | -2472.257498 | -2471.603267 |
| [CoP(COOH)] <sup>0</sup> | 5 | 0.647441 | -2470.776928 | -2470.773916 | -2472.22882  | -2471.578368 |

|                           |   |          |              |              |              |              |
|---------------------------|---|----------|--------------|--------------|--------------|--------------|
| [CoP(COOH)] <sup>-1</sup> | 4 | 0.644418 | -2470.898515 | -2470.895503 | -2472.358943 | -2471.711513 |
| [CoP(COOH)] <sup>-1</sup> | 6 | 0.640929 | -2470.852063 | -2470.849051 | -2472.310942 | -2471.667001 |

|                         |   |          |              |              |              |              |
|-------------------------|---|----------|--------------|--------------|--------------|--------------|
| [CoP(CO)] <sup>+4</sup> | 2 | 0.637374 | -2394.473629 | -2394.470617 | -2395.84816  | -2395.207774 |
| [CoP(CO)] <sup>+4</sup> | 4 | 0.633871 | -2394.414836 | -2394.411824 | -2395.785509 | -2395.148626 |

|                         |   |          |              |              |              |              |
|-------------------------|---|----------|--------------|--------------|--------------|--------------|
| [CoP(CO)] <sup>+2</sup> | 2 | 0.638144 | -2394.738828 | -2394.735816 | -2396.126662 | -2395.485506 |
| [CoP(CO)] <sup>+2</sup> | 4 | 0.634987 | -2394.727108 | -2394.724096 | -2396.109659 | -2395.47166  |

|                         |   |          |              |              |              |              |
|-------------------------|---|----------|--------------|--------------|--------------|--------------|
| [CoP(CO)] <sup>+1</sup> | 1 | 0.636352 | -2394.85805  | -2394.855038 | -2396.251169 | -2395.611805 |
| [CoP(CO)] <sup>+1</sup> | 3 | 0.635028 | -2394.858741 | -2394.855729 | -2396.250494 | -2395.612454 |
| [CoP(CO)] <sup>+1</sup> | 5 | 0.633873 | -2394.849687 | -2394.846675 | -2396.238339 | -2395.601455 |

|                        |   |          |              |              |              |              |
|------------------------|---|----------|--------------|--------------|--------------|--------------|
| [CoP(CO)] <sup>0</sup> | 2 | 0.632215 | -2394.974691 | -2394.971679 | -2396.371925 | -2395.736698 |
| [CoP(CO)] <sup>0</sup> | 4 | 0.631586 | -2394.975461 | -2394.972449 | -2396.372076 | -2395.737478 |
| [CoP(CO)] <sup>0</sup> | 6 | 0.626359 | -2394.956901 | -2394.953889 | -2396.346913 | -2395.717542 |

|                         |   |          |              |              |              |              |
|-------------------------|---|----------|--------------|--------------|--------------|--------------|
| [CoP(CO)] <sup>-1</sup> | 1 | 0.632256 | -2395.081784 | -2395.078772 | -2396.490721 | -2395.855453 |
| [CoP(CO)] <sup>-1</sup> | 3 | 0.63124  | -2395.082887 | -2395.079875 | -2396.490809 | -2395.856557 |

|                        |   |          |              |              |              |              |
|------------------------|---|----------|--------------|--------------|--------------|--------------|
| [CoP(H)] <sup>+4</sup> | 1 | 0.650552 | -2281.670440 | -2281.667428 | -2283.015501 | -2282.361937 |
| [CoP(H)] <sup>+4</sup> | 3 | 0.647395 | -2281.638705 | -2281.635693 | -2282.980652 | -2282.330246 |
| [CoP(H)] <sup>+4</sup> | 5 | 0.64352  | -2281.581998 | -2281.578986 | -2282.919091 | -2282.272559 |
|                        |   |          |              |              |              |              |
| [CoP(H)] <sup>+3</sup> | 2 | 0.645288 | -2281.834992 | -2281.831980 | -2283.181287 | -2282.532987 |
| [CoP(H)] <sup>+3</sup> | 4 | 0.64458  | -2281.783498 | -2281.780486 | -2283.127742 | -2282.48015  |
| [CoP(H)] <sup>+3</sup> | 6 | 0.641274 | -2281.733393 | -2281.730381 | -2283.073289 | -2282.429003 |
|                        |   |          |              |              |              |              |
| [CoP(H)] <sup>+2</sup> | 1 | 0.645945 | -2281.973993 | -2281.970981 | -2283.329012 | -2282.680055 |
| [CoP(H)] <sup>+2</sup> | 3 | 0.644731 | -2281.960290 | -2281.957278 | -2283.311964 | -2282.66422  |
| [CoP(H)] <sup>+2</sup> | 5 | 0.640024 | -2281.923331 | -2281.920319 | -2283.268826 | -2282.62579  |
|                        |   |          |              |              |              |              |
| [CoP(H)] <sup>+1</sup> | 2 | 0.640821 | -2282.096416 | -2282.093404 | -2283.453383 | -2282.80955  |
| [CoP(H)] <sup>+1</sup> | 4 | 0.640796 | -2282.086124 | -2282.083112 | -2283.44105  | -2282.797242 |
|                        |   |          |              |              |              |              |
| [CoP(H)] <sup>0</sup>  | 1 | 0.641021 | -2282.207833 | -2282.204821 | -2283.575154 | -2282.931121 |
| [CoP(H)] <sup>0</sup>  | 3 | 0.638536 | -2282.211110 | -2282.208098 | -2283.574071 | -2282.932523 |
| [CoP(H)] <sup>0</sup>  | 5 | 0.635801 | -2282.182015 | -2282.179003 | -2283.536532 | -2282.89772  |
|                        |   |          |              |              |              |              |
| [CoP(H)] <sup>-1</sup> | 2 | 0.636838 | -2282.321057 | -2282.318045 | -2283.694025 | -2283.054175 |
| [CoP(H)] <sup>-1</sup> | 4 | 0.632433 | -2282.303103 | -2282.300091 | -2283.664712 | -2283.029267 |
| [CoP(H)] <sup>-1</sup> | 6 | 0.627017 | -2282.245617 | -2282.242605 | -2283.611417 | -2282.981388 |

<sup>a</sup> different conformer of the same system with the same charge and spin.

## Supplementary Schemes

### Preparation of liposomes

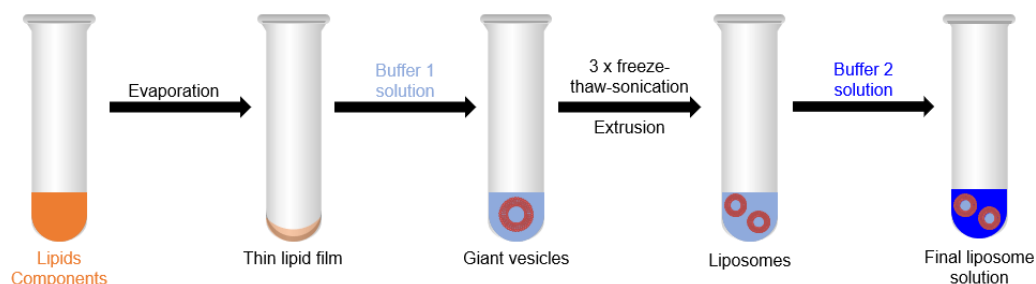

**Scheme S1.** Scheme of preparation of liposomes.

### Synthesis of ligands, catalysts and photosensitizer

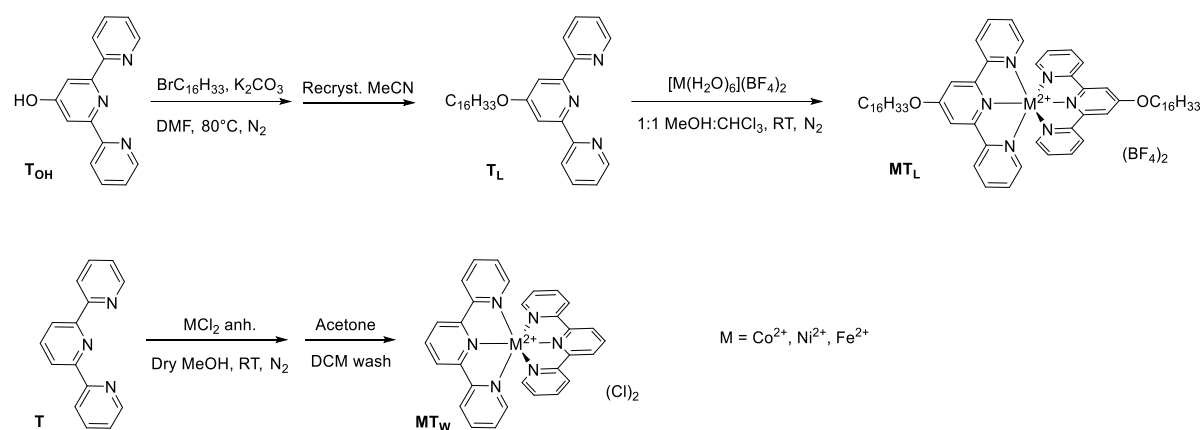

**Scheme S2.** Synthetic procedure to terpyridine catalysts  $MT_L$  and  $MT_w$  ( $M = Co^{2+}$ ,  $Ni^{2+}$  or  $Fe^{2+}$ ).

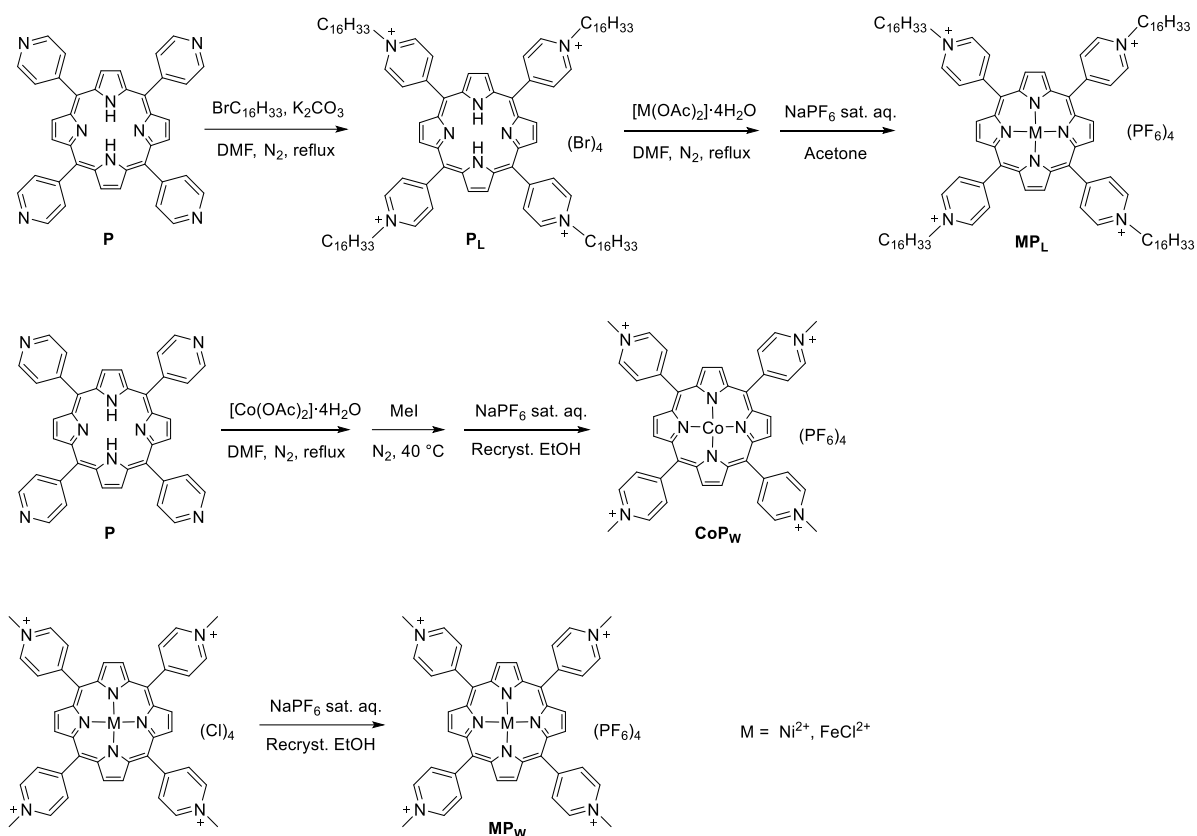

**Scheme S3.** Synthetic procedure to porphyrin catalysts **MP<sub>L</sub>** and **MP<sub>W</sub>** (M = Co<sup>2+</sup>, Ni<sup>2+</sup> or FeCl<sup>2+</sup>).

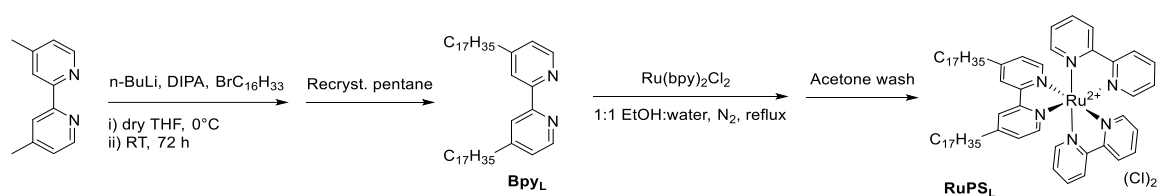

**Scheme S4.** Synthetic procedure to alkylated ruthenium bipyridine photosensitizer **RuPS<sub>L</sub>**.

## Summary of atom labeling for Raman assignments of the cobalt porphyrin

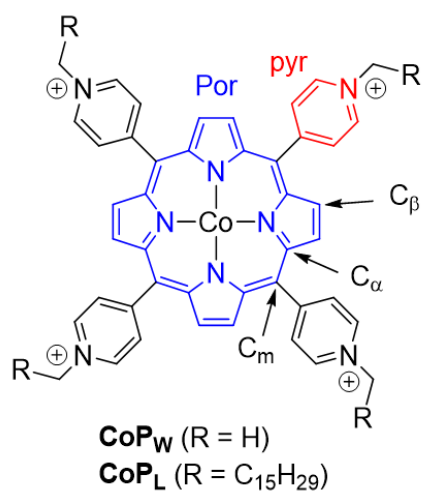

**Scheme S5.** Simplified structure of studied cobalt porphyrins with summary of atom labeling for Raman assignments. C<sub>α</sub> and C<sub>β</sub> correspond to pyrrole carbon atoms, while C<sub>m</sub> stands for methine carbon atom. (Blue) Por = porphyrin ring, (red) Pyr = N-pyridinium ring.

## Supplementary Figures

### NMR spectroscopy of prepared ligands and RuPS<sub>L</sub>

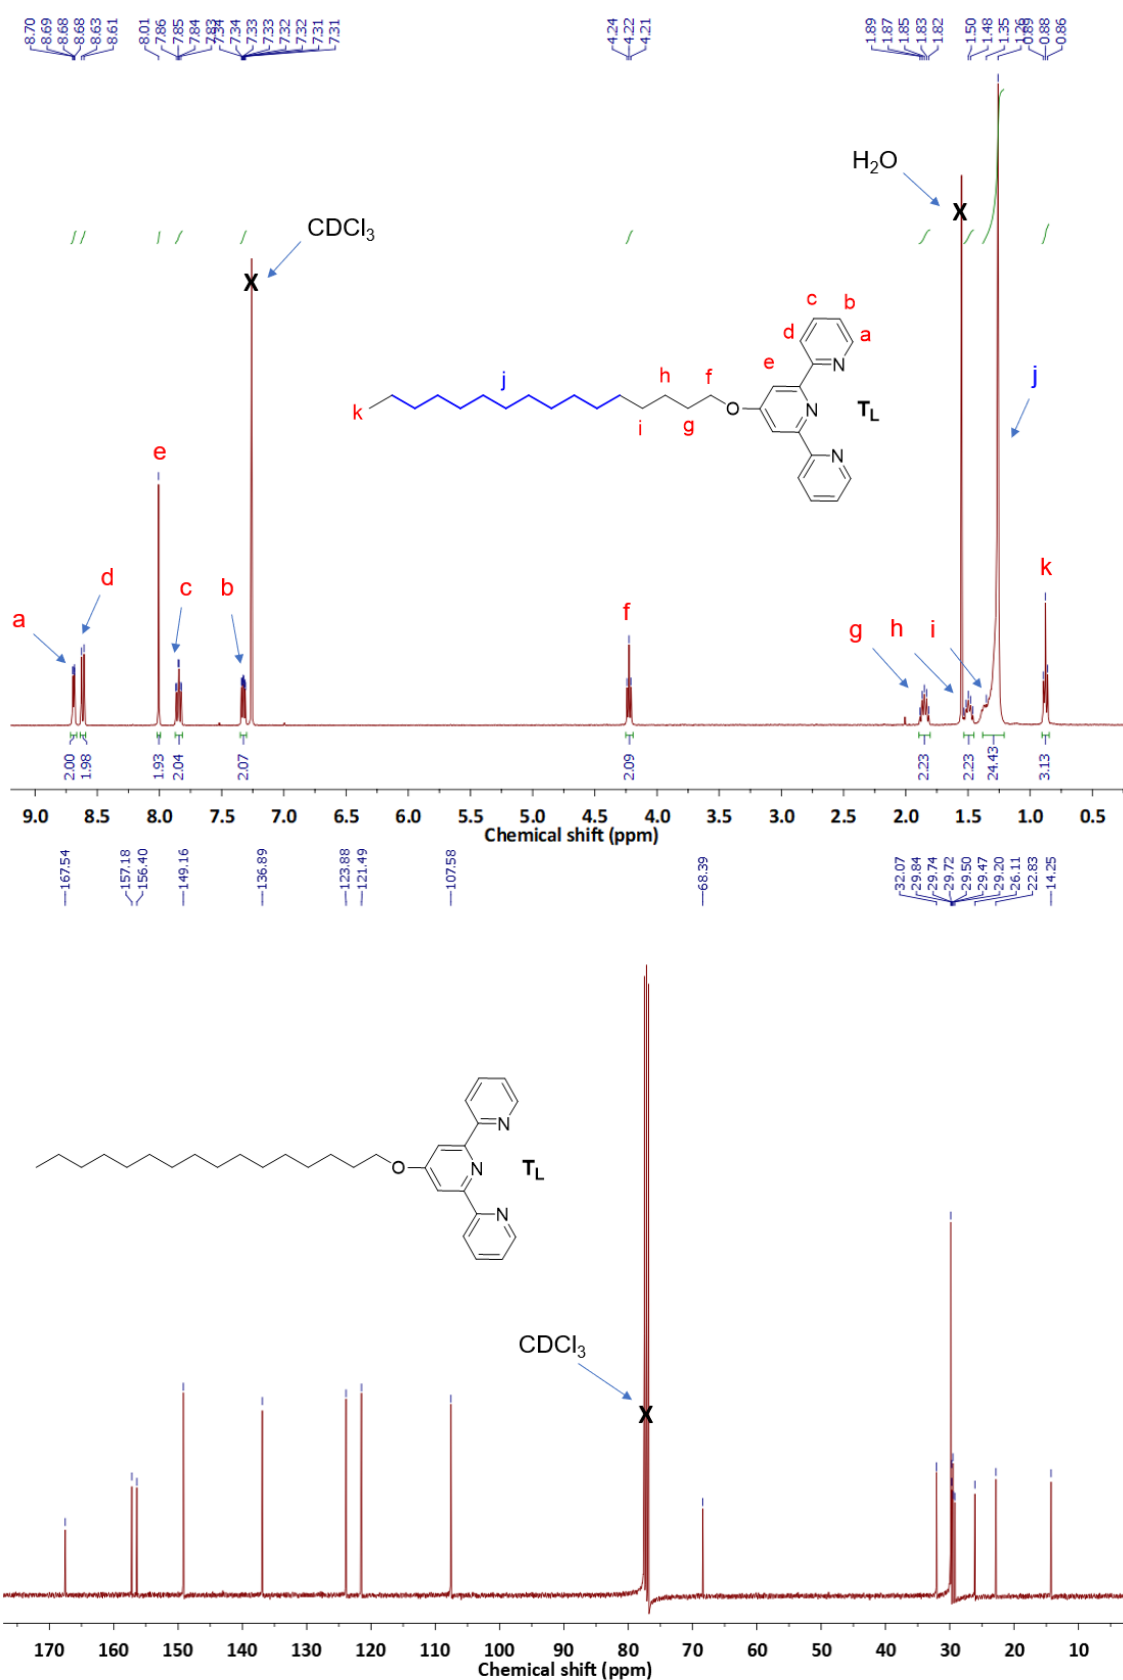

**Figure S1.** (Top) <sup>1</sup>H and (bottom) <sup>13</sup>C NMR spectra of alkylated terpyridine ligand **T<sub>L</sub>** in CDCl<sub>3</sub>.



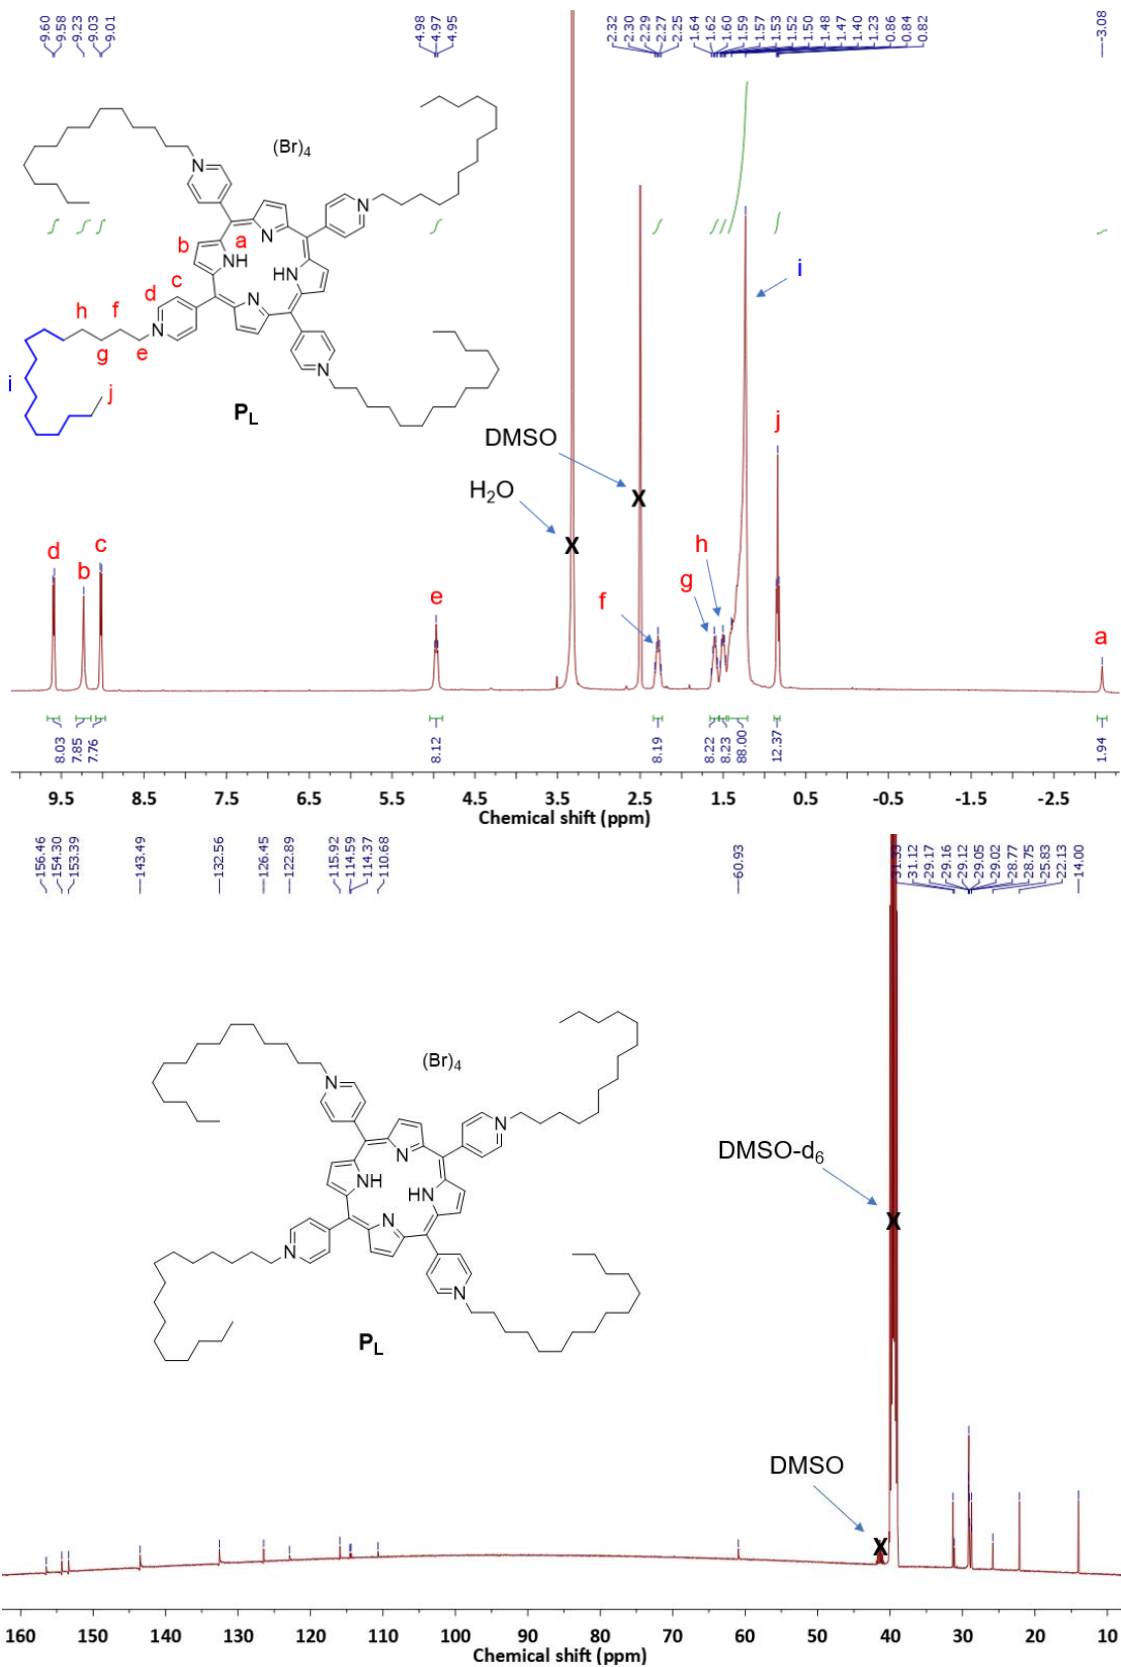

**Figure S2.** (Top)  $^1\text{H}$  and (bottom)  $^{13}\text{C}$  NMR spectra of alkylated porphyrin ligand  $\text{P}_\text{L}$  in  $\text{DMSO-d}_6$ .

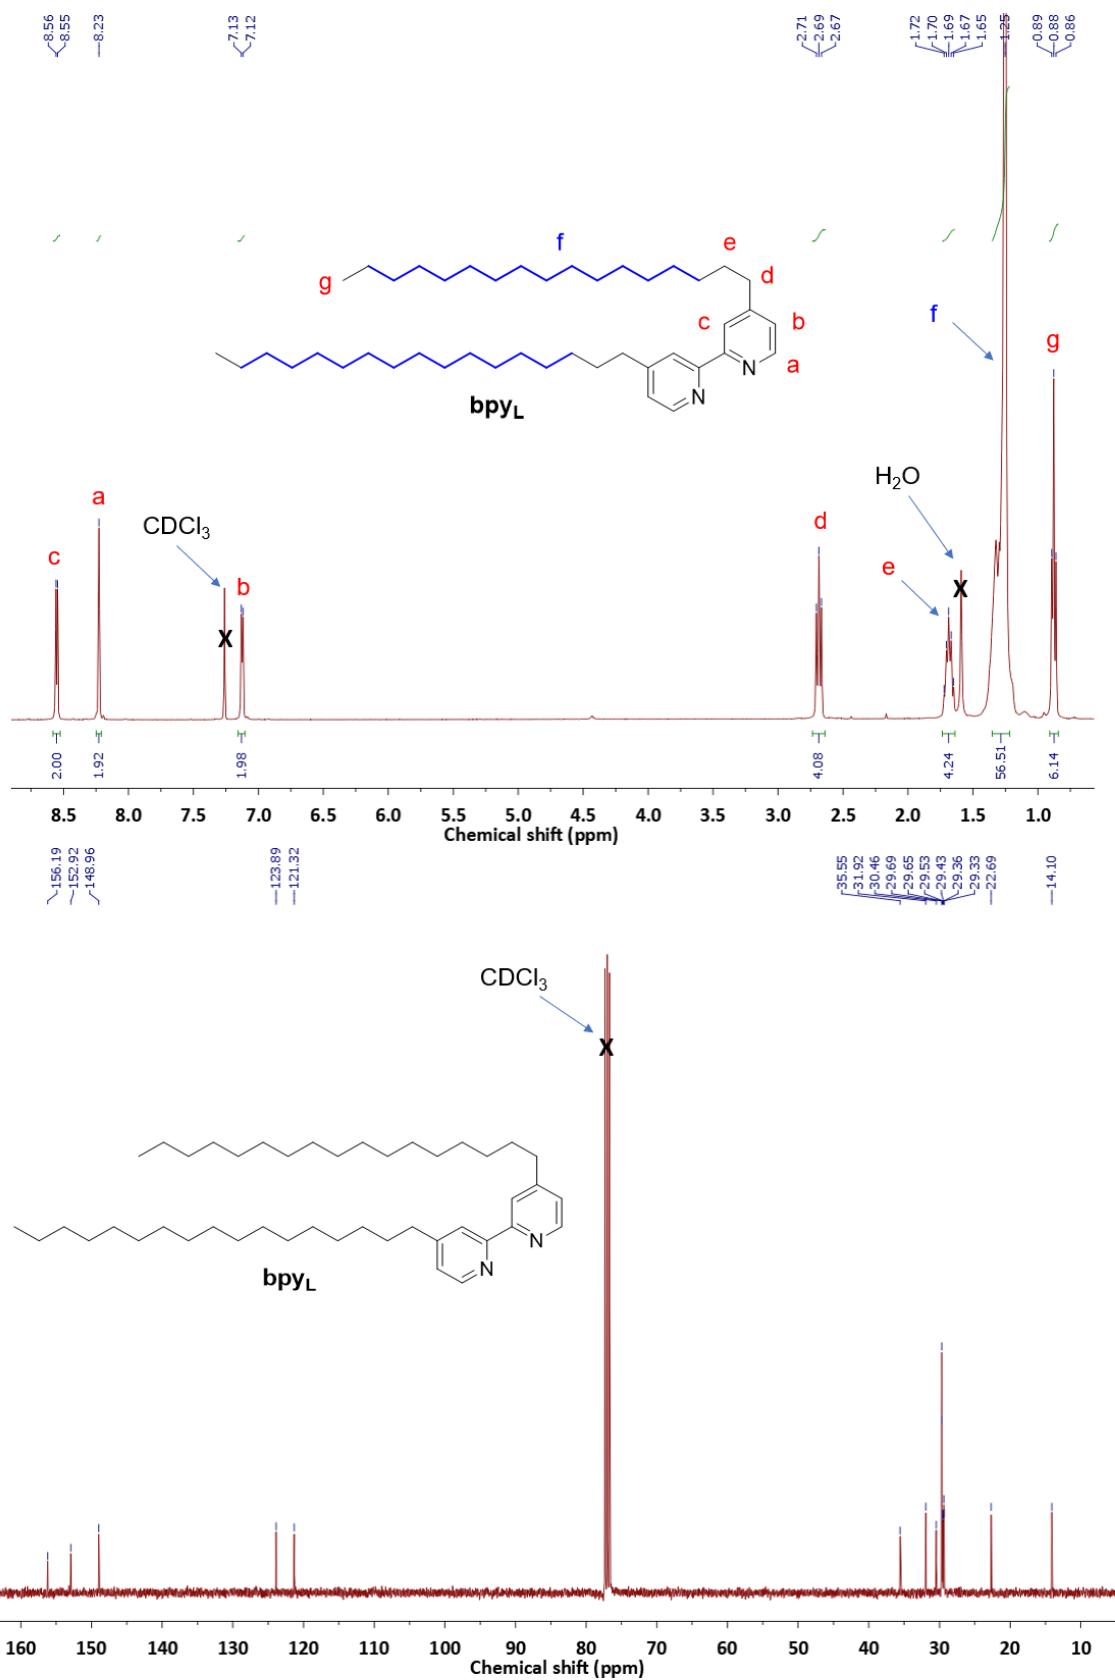

**Figure S3.** (Top) <sup>1</sup>H and (bottom) <sup>13</sup>C NMR spectra of alkylated bipyridine ligand **bpy<sub>L</sub>** in CDCl<sub>3</sub>.

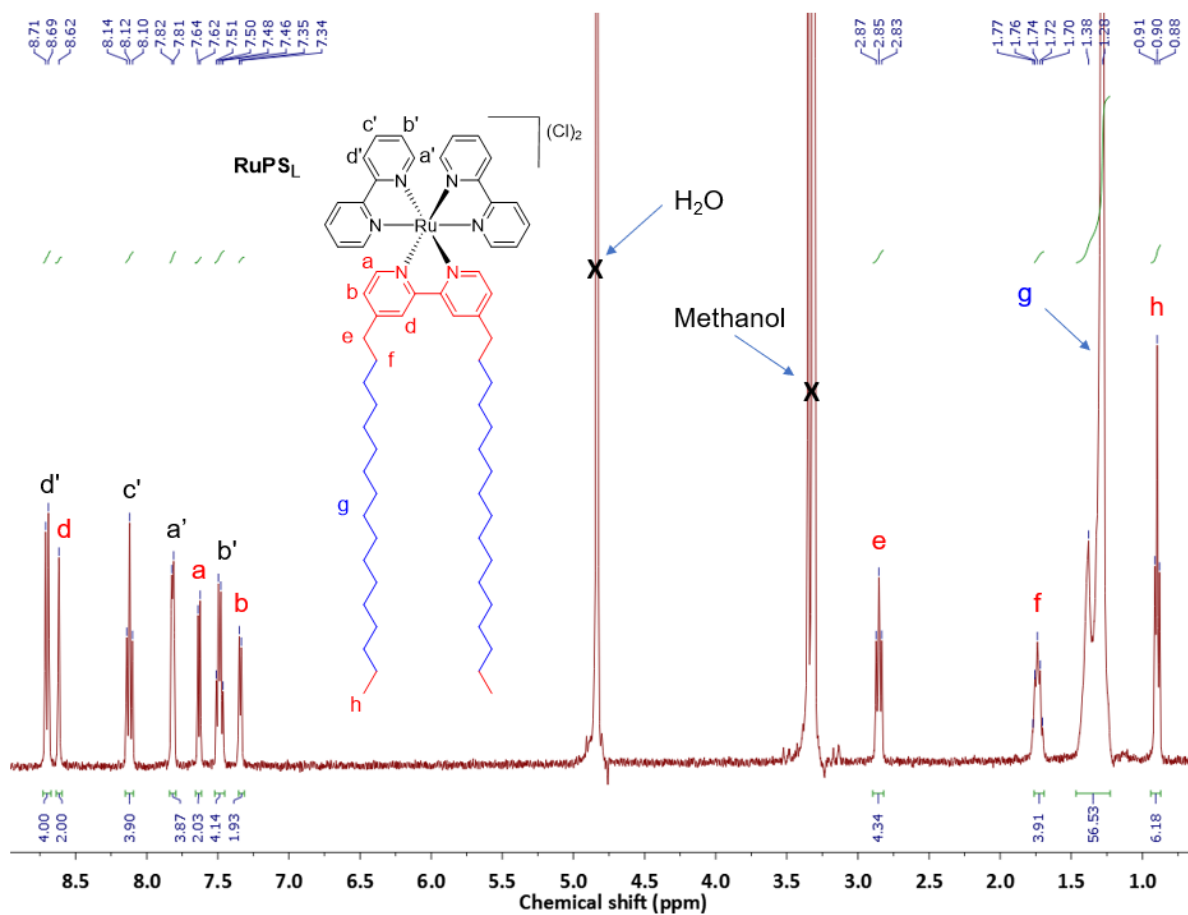

**Figure S4.**  $^1\text{H}$  NMR of alkylated ruthenium tris-bipyridine photosensitizer  $\text{RuPS}_L$  in  $\text{CD}_3\text{OD}$ .

## Absorption spectroscopy of molecular species

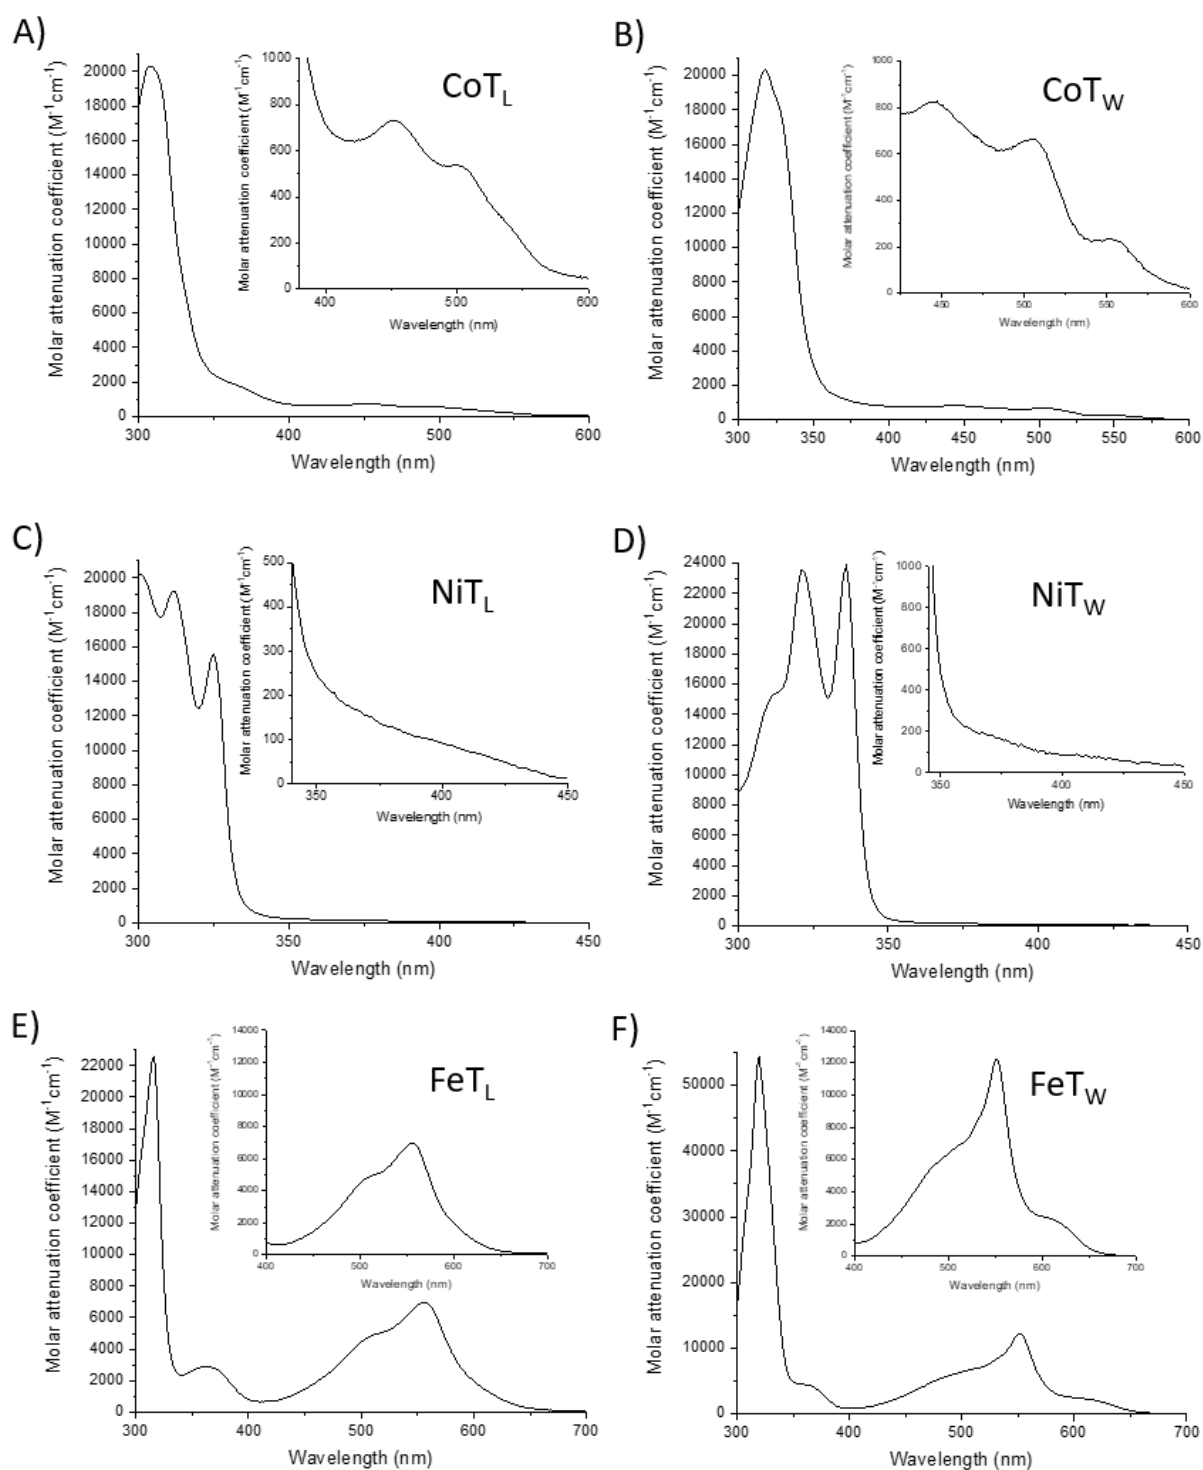

**Figure S5.** UV-vis absorption spectra in methanol of terpyridine-based catalysts: (A)  $CoT_L$ , (B)  $CoT_W$ , (C)  $NiT_L$ , (D)  $NiT_W$ , (E)  $FeT_L$  and (F)  $FeT_W$ . In all cases, due to the electron-donating effect of the  $OC_{16}H_{33}$  tails  $MT_L$  present a small blue shift of the absorption features compared to  $MT_W$ .

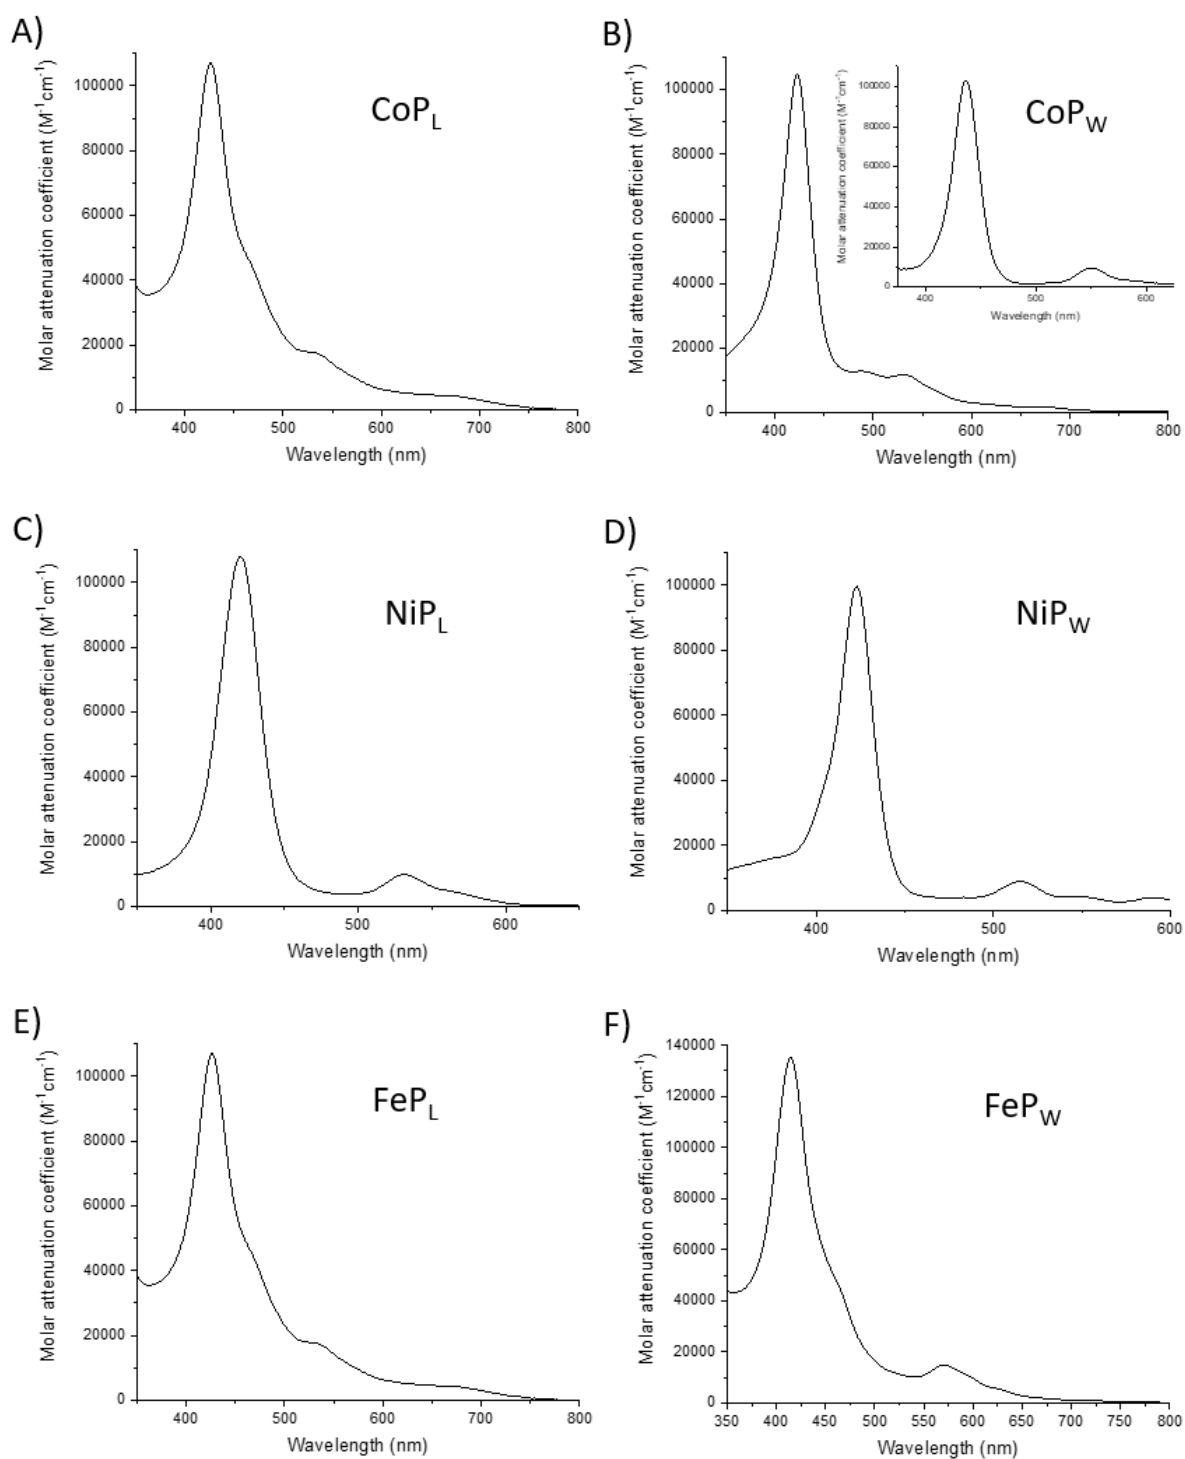

**Figure S6.** UV-vis absorption spectra in acetone of porphyrin-based catalysts: (A) **CoP<sub>L</sub>**, (B) **CoP<sub>W</sub>** (inset, in Milli-Q water), (C) **NiP<sub>L</sub>**, (D) **NiP<sub>W</sub>**, (E) **FeP<sub>L</sub>** and (F) **FeP<sub>W</sub>**.

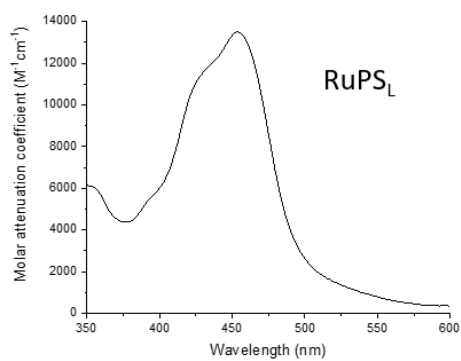

**Figure S7.** UV-vis absorption spectrum of photosensitizer **RuPS<sub>L</sub>** in methanol.

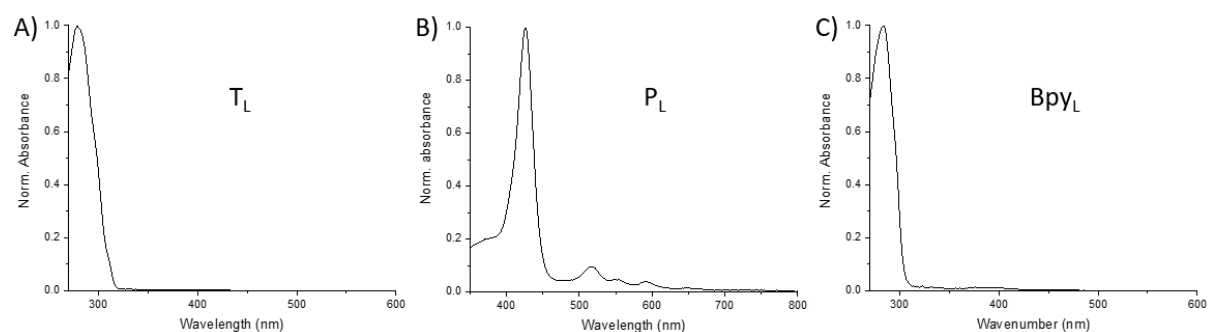

**Figure S8.** UV-vis absorption spectrum of (A) **T<sub>L</sub>** in  $\text{CHCl}_3$ , (B) **P<sub>L</sub>** in methanol and (C) **Bpy<sub>L</sub>** in  $\text{CHCl}_3$ .

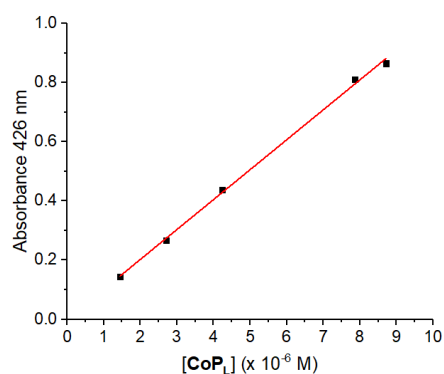

**Figure S9.** Calibration curve for the Soret band of **CoP<sub>L</sub>** at 426 nm in acetone. Molar attenuation coefficient ( $\epsilon_{426\text{nm}} = 1.07 \cdot 10^5 \text{ M}^{-1} \text{ cm}^{-1}$ ), i.e. molar extinction coefficient, was calculated for all molecular species from the slope of the linear fit.

## Electrochemistry measurements of molecular catalysts in DMF

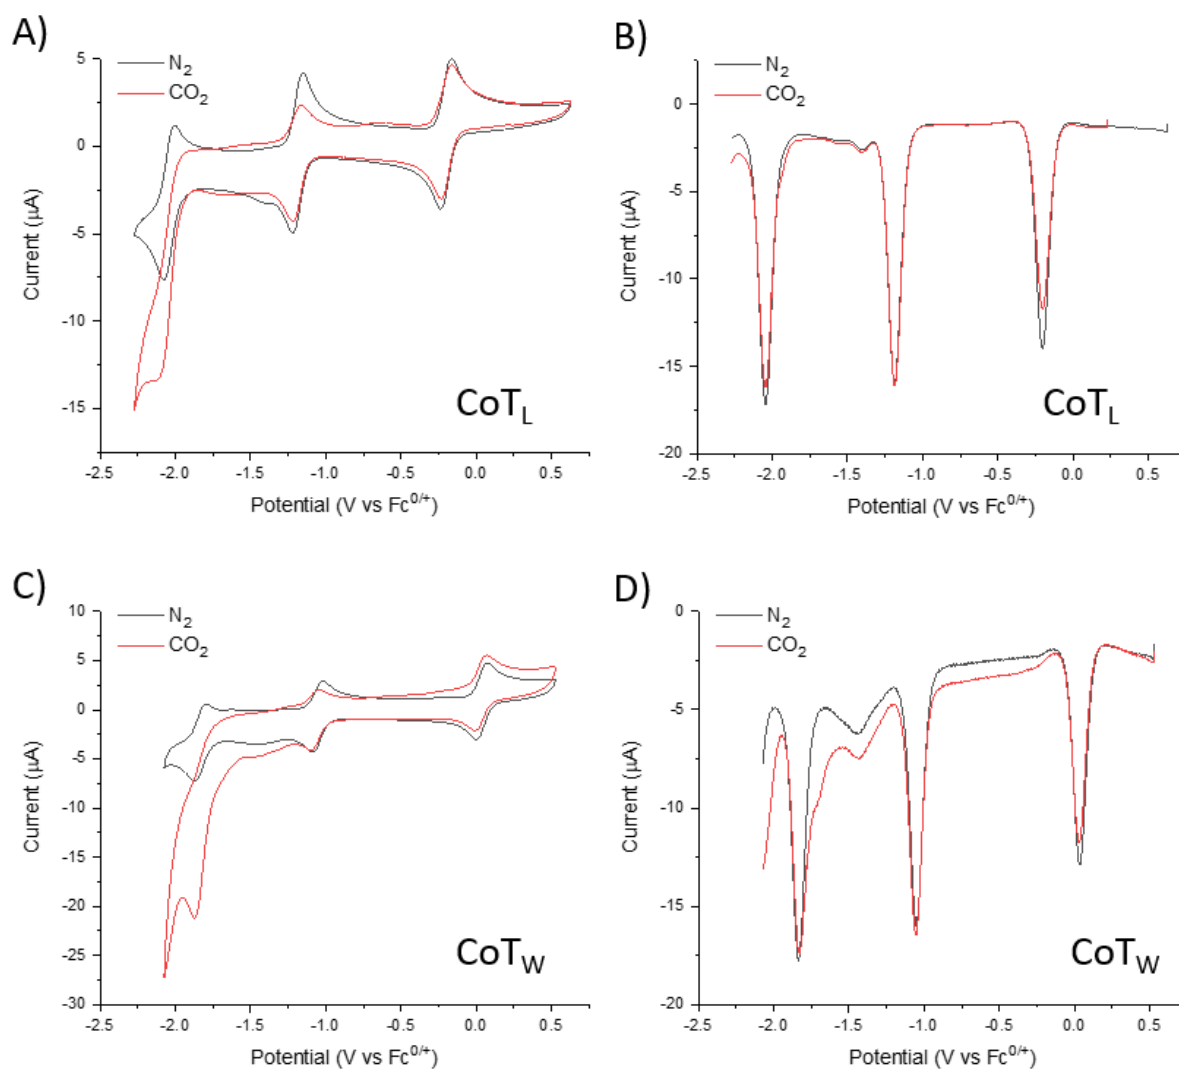

**Figure S10.** (A and C) CV and (B and D) SWV of (top)  $\text{CoT}_L$  and (bottom)  $\text{CoT}_W$  in  $\text{N}_2$ - and  $\text{CO}_2$ -saturated 0.2 M  $\text{TBAPF}_6$  DMF solutions. The electrochemical behaviour of both terpyridine-based catalysts match that of previous reports.<sup>3, 13</sup>

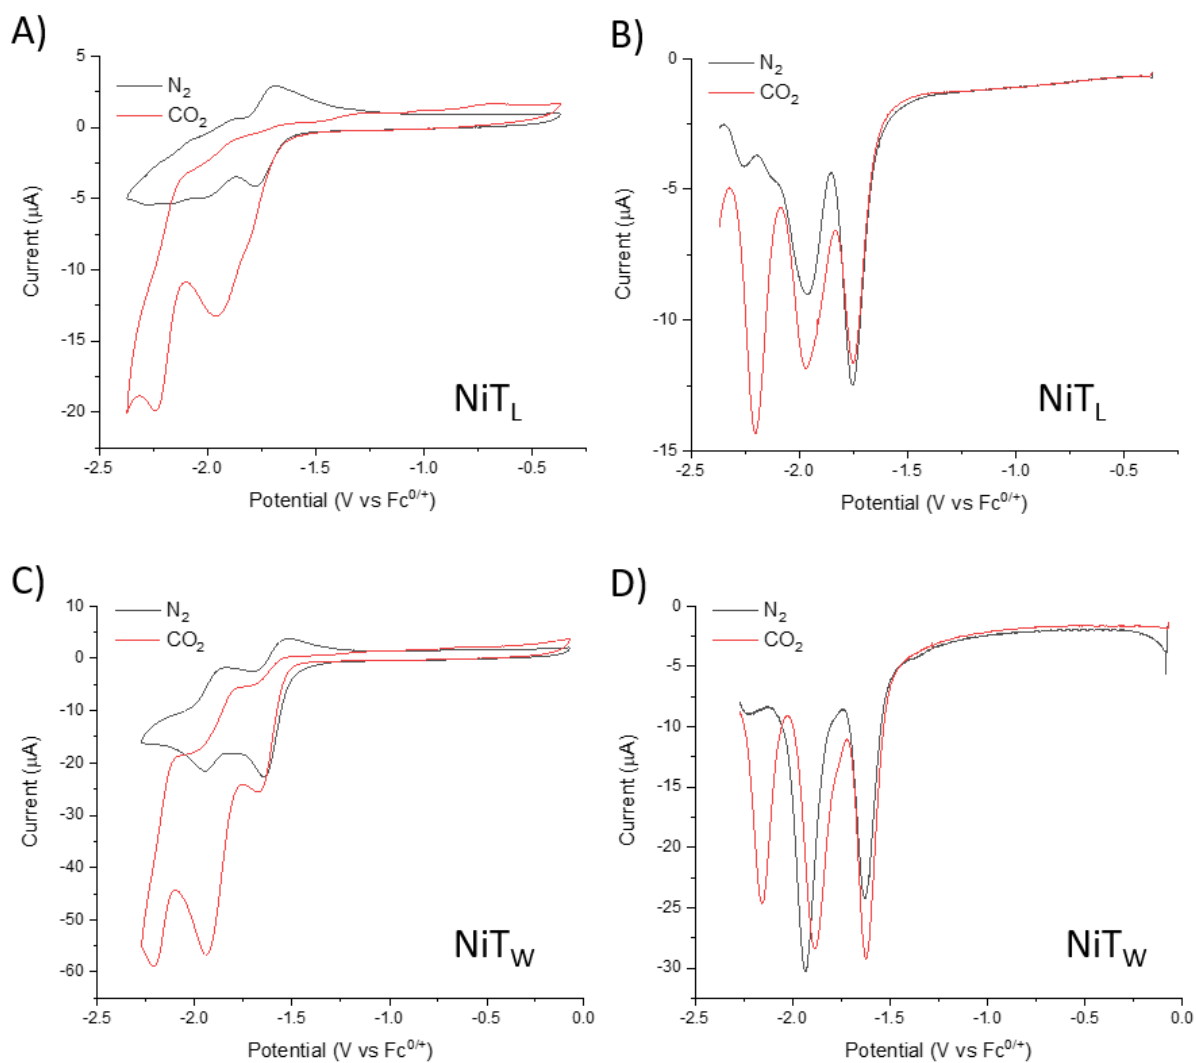

**Figure S11.** (A and C) CV and (B and D) SWV of (top)  $\text{NiT}_L$  and (bottom)  $\text{NiT}_W$  in  $\text{N}_2$ - and  $\text{CO}_2$ -saturated 0.2 M TBAPF<sub>6</sub> DMF solutions. The electrochemical behaviour of both terpyridine-based catalysts match that of previous reports.<sup>3, 13</sup>



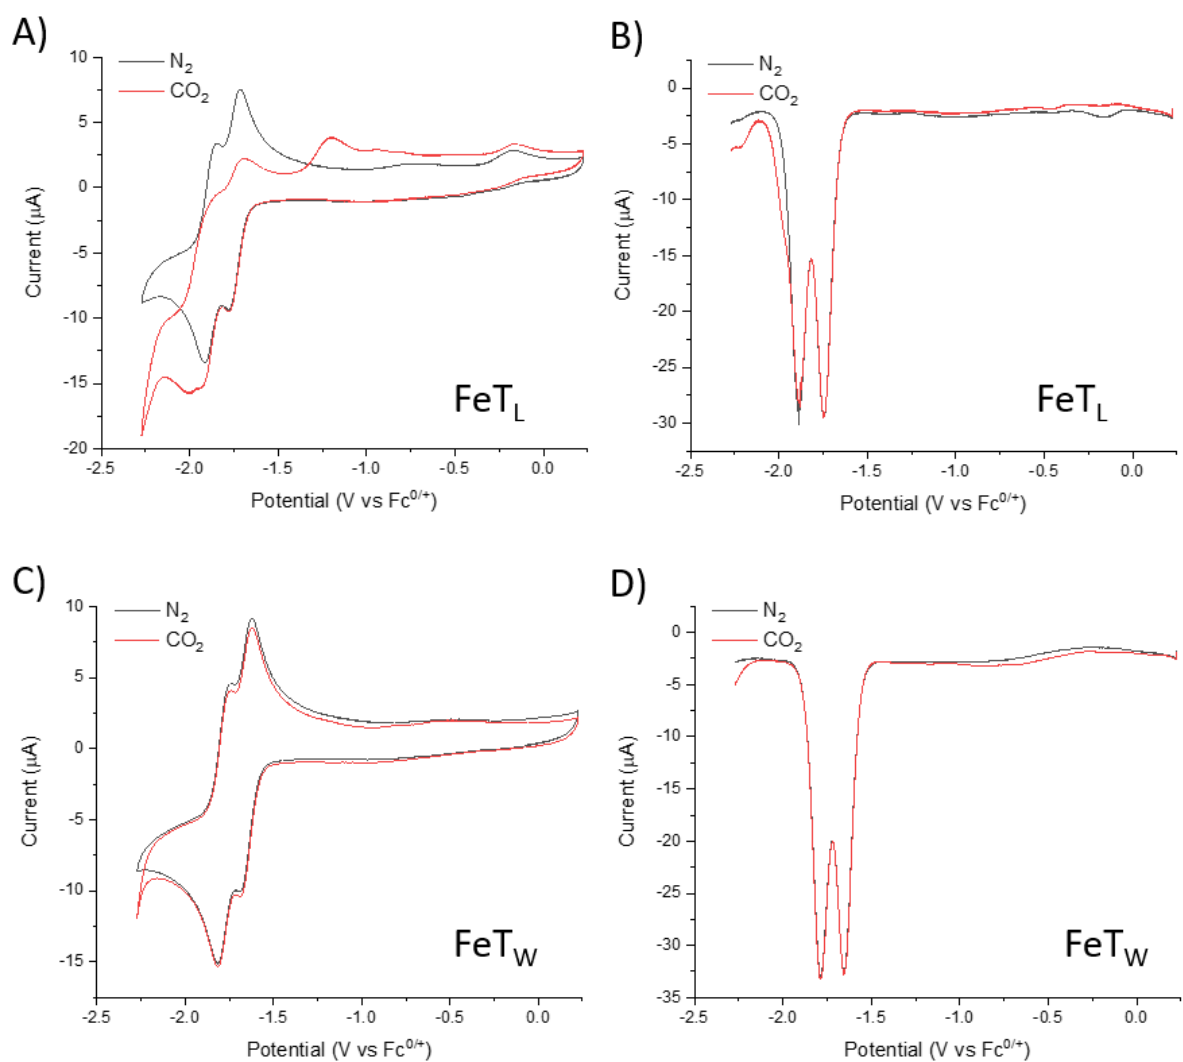

**Figure S12.** (A and C) CV and (B and D) SWV of (top) **FeT<sub>L</sub>** and (bottom) **FeT<sub>W</sub>** in N<sub>2</sub>- and CO<sub>2</sub>-saturated 0.2 M TBAPF<sub>6</sub> DMF solutions. The electrochemical behaviour of both terpyridine-based catalysts match that of previous reports.<sup>3, 13</sup>

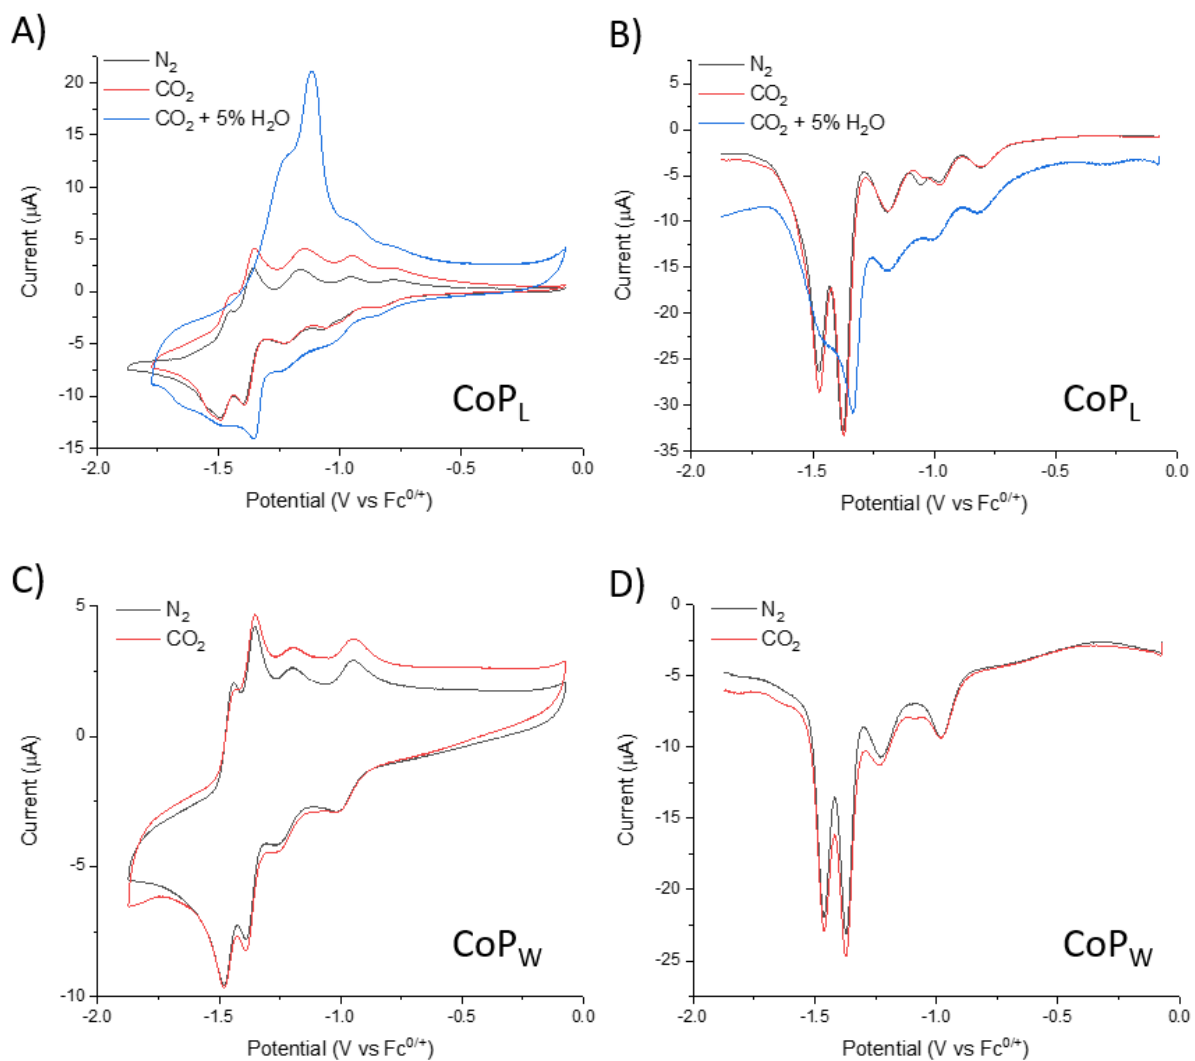

**Figure S13.** (A and C) CV and (B and D) SWV of (top) **CoP<sub>L</sub>** and (bottom) **CoP<sub>W</sub>** in  $\text{N}_2$ - and  $\text{CO}_2$ -saturated 0.2 M TBAPF<sub>6</sub> DMF solutions. In blue: **CoP<sub>L</sub>** in  $\text{CO}_2$ -saturated 95:5 0.2 M TBAPF<sub>6</sub> DMF:0.2 M KCl Milli-Q water.

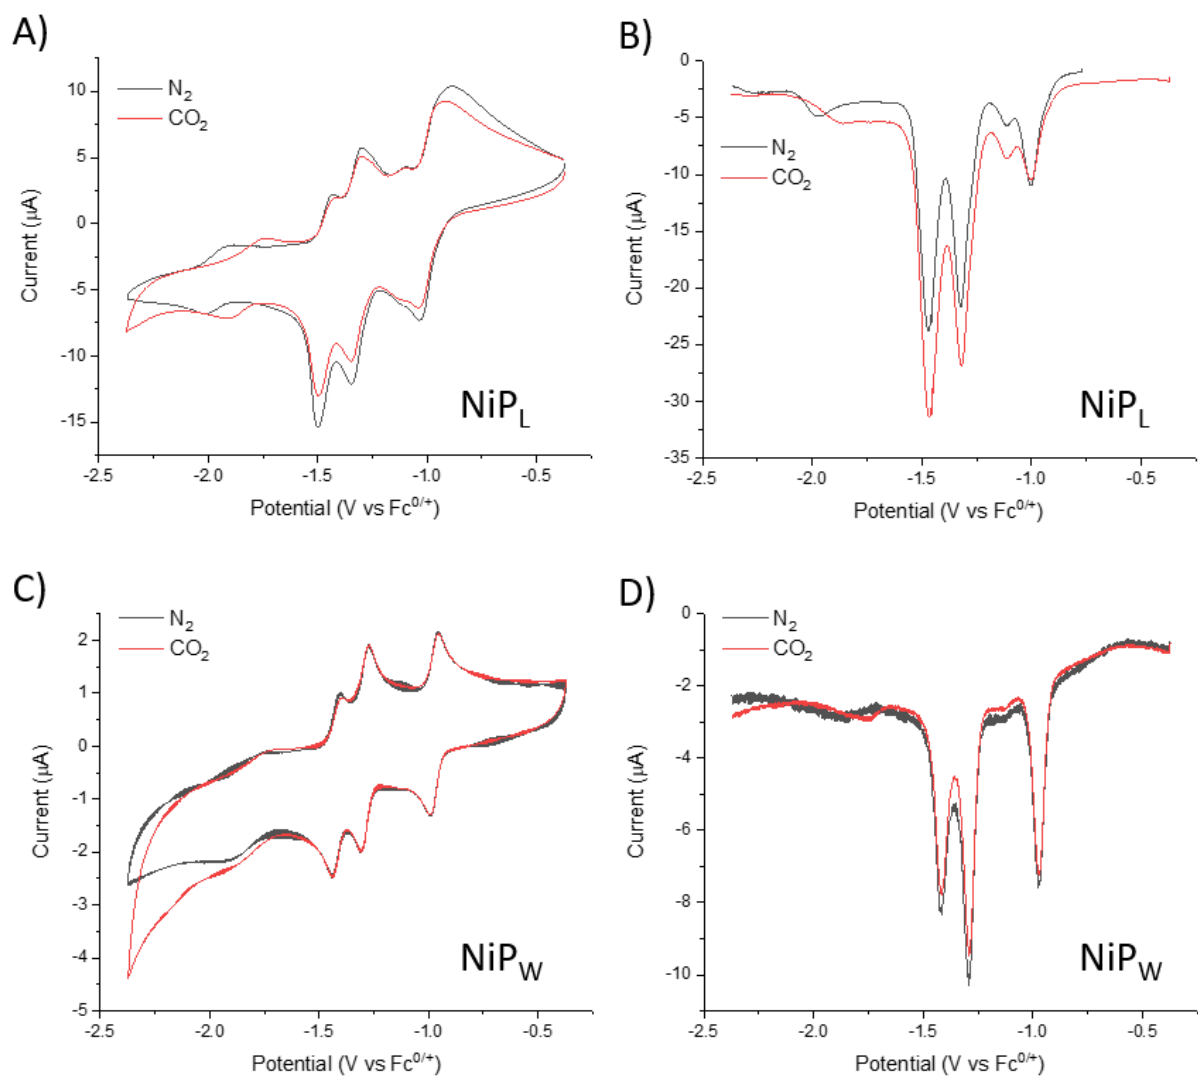

**Figure S14.** (A and C) CV and (B and D) SWV of (top) **NiP<sub>L</sub>** and (bottom) **NiP<sub>W</sub>** in N<sub>2</sub>- and CO<sub>2</sub>-saturated 0.2 M TBAPF<sub>6</sub> DMF solutions.

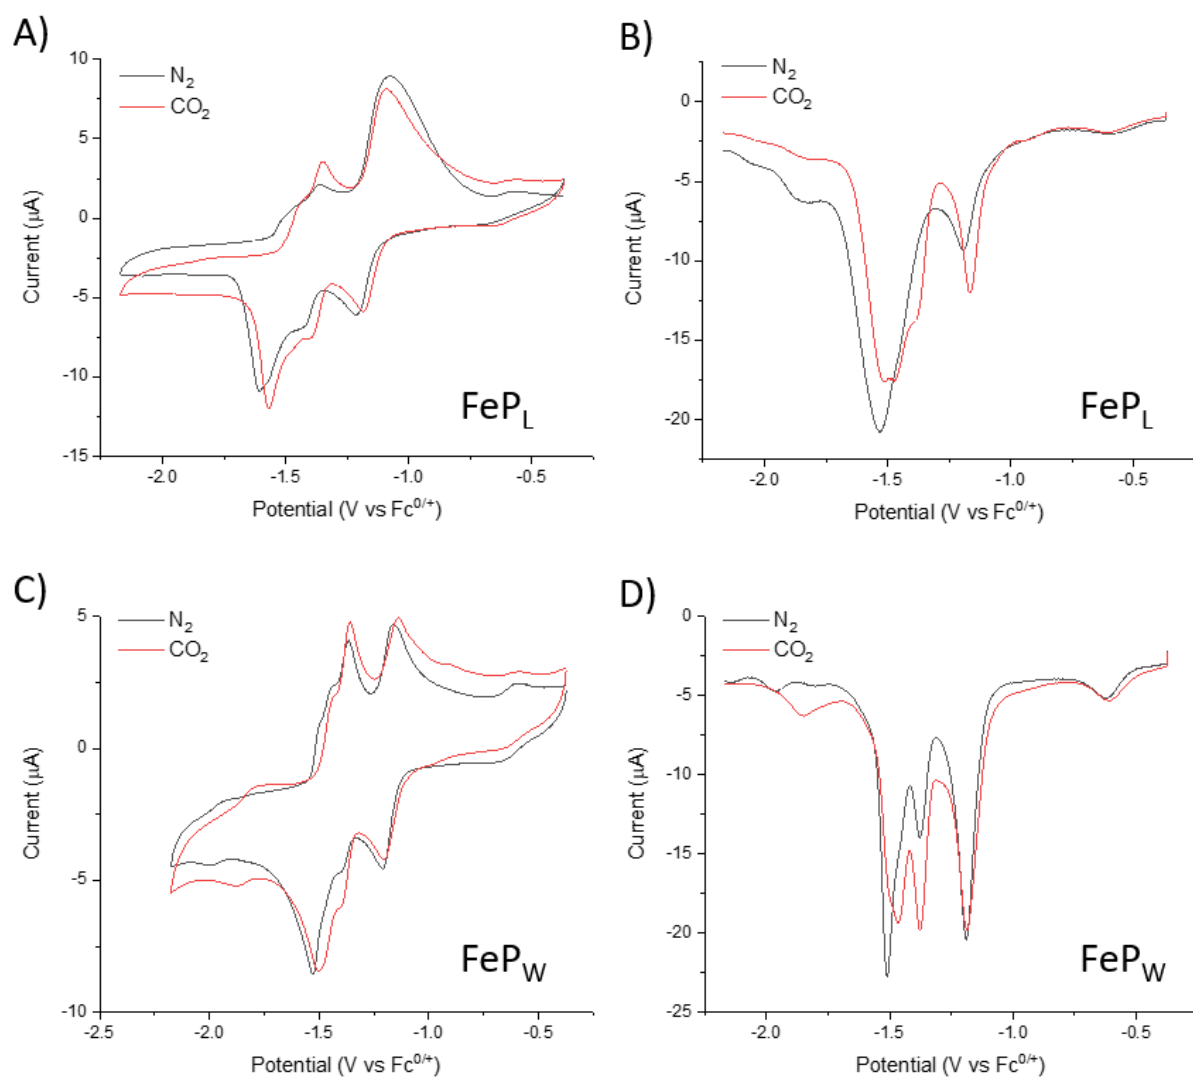

**Figure S15.** (A and C) CV and (B and D) SWV of (top) **FeP<sub>L</sub>** and (bottom) **FeP<sub>W</sub>** in N<sub>2</sub>- and CO<sub>2</sub>-saturated 0.2 M TBAPF<sub>6</sub> DMF solutions.

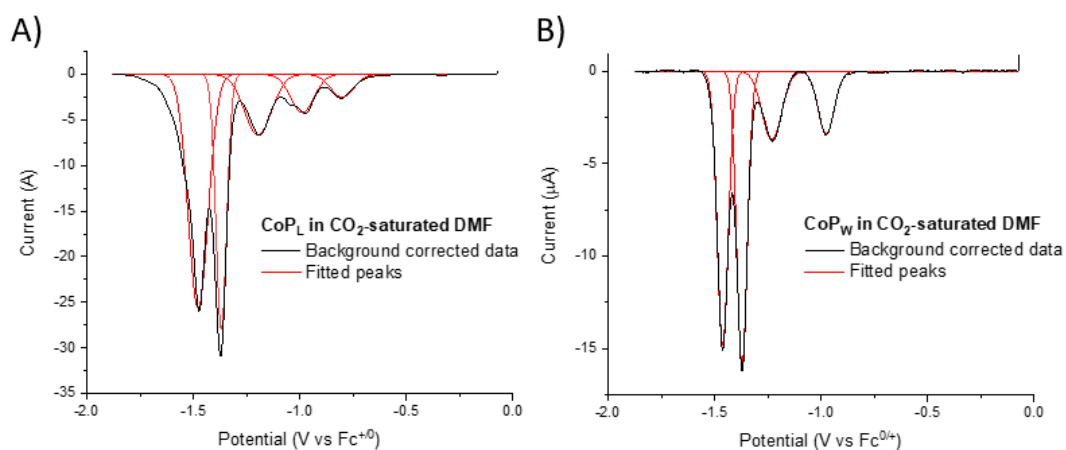

**Figure S16.** SWV of **CoP<sub>L</sub>** and **CoP<sub>W</sub>** in CO<sub>2</sub>-saturated DMF and (red) fitted peaks. Fitting of peaks was performed using *Multi Peak Fit* function in *OriginPro 2017*.

### Cryogenic transmission electron microscopy

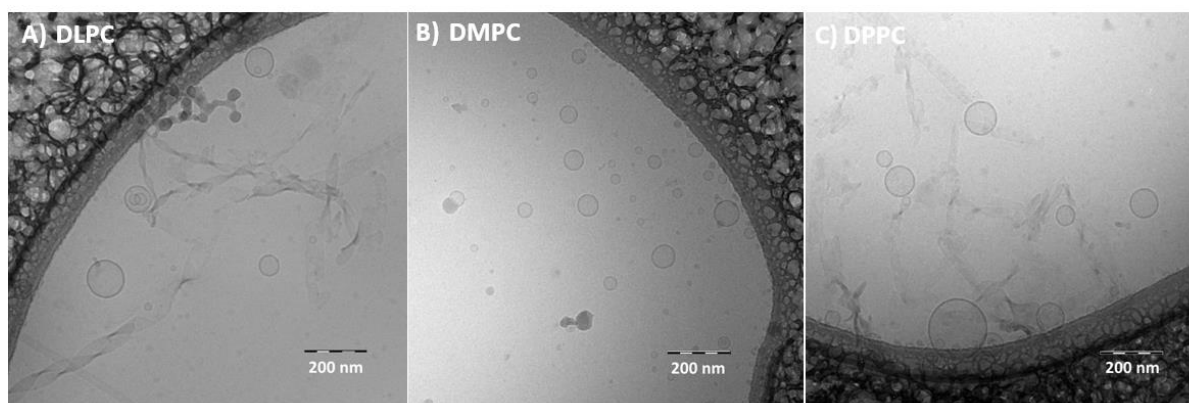

**Figure S17.** Cryo-TEM picture of unilamellar liposomes containing DLPC, DMPC or DPPC at [lipid] = 100 μM, and [NaDSPE-PEG2K] = 1 μM, [**RuPS<sub>L</sub>**] = 10 μM and [**Ni<sub>T</sub><sub>L</sub>**] = 2 μM. N.B. for further details see Supplementary Note 1 in section above.

## Summary of photocatalytic performance of alkylated catalysts in liposomes

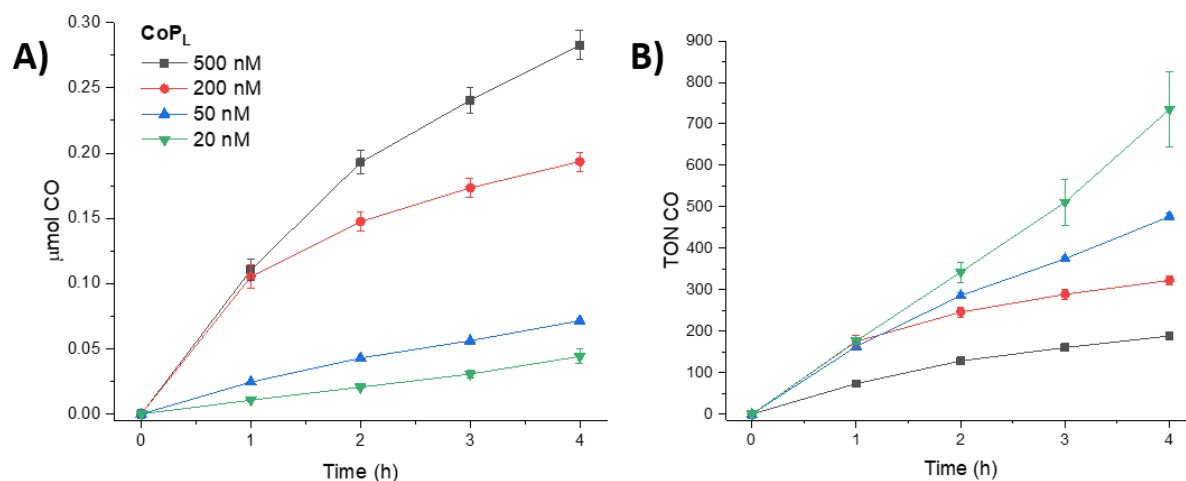

**Figure S18.** CO formation as a function of time and concentration of **CoP<sub>L</sub>** in DMPC liposomes containing [DMPC] = 100  $\mu\text{M}$ , [NaDSPE-PEG2K] = 1  $\mu\text{M}$ , [RuPS<sub>L</sub>] = 10  $\mu\text{M}$ , [CoP<sub>L</sub>] = 20-500 nM. Conditions: CO<sub>2</sub>-saturated 0.1 M NaHCO<sub>3</sub> and 0.1 M sodium ascorbate (3 mL, pH = 6.7) at 25 °C under visible light irradiation ( $\lambda > 400$  nm, AM 1.5G, 100 mW cm<sup>-2</sup>). Experiments were performed in triplicates. See Tables S7 and S8 for further information.

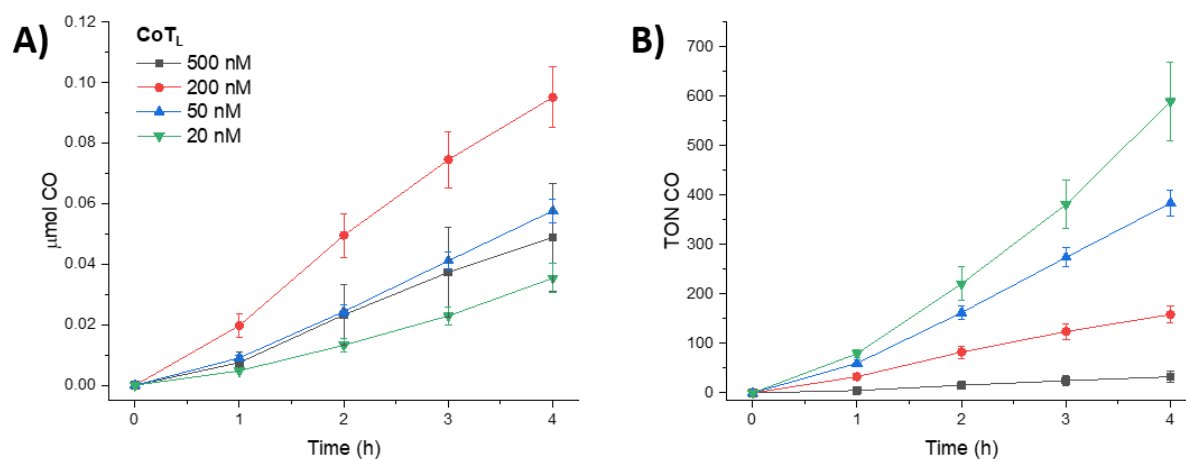

**Figure S19.** CO formation as a function of time and concentration of **CoT<sub>L</sub>** in DMPC liposomes containing [DMPC] = 100  $\mu\text{M}$ , [NaDSPE-PEG2K] = 1  $\mu\text{M}$ , [RuPS<sub>L</sub>] = 10  $\mu\text{M}$ , [CoT<sub>L</sub>] = 20-500 nM. Conditions: CO<sub>2</sub>-saturated 0.1 M NaHCO<sub>3</sub> and 0.1 M sodium ascorbate (3 mL, pH = 6.7) at 25 °C under visible light irradiation ( $\lambda > 400$  nm, AM 1.5G, 100 mW cm<sup>-2</sup>). Experiments were performed in triplicates. See Tables S7 and S8 for further information.

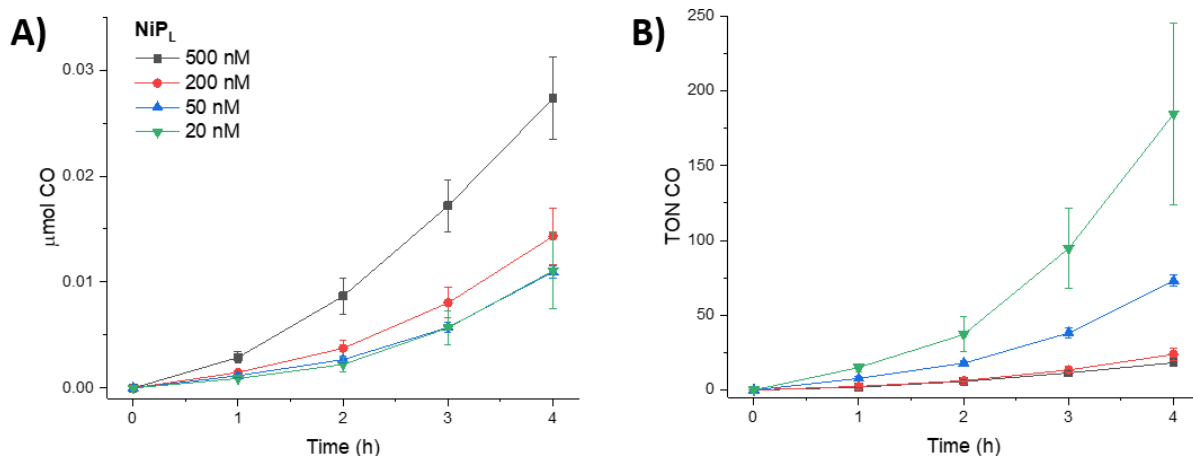

**Figure S20.** CO formation as a function of time and concentration of **NiP<sub>L</sub>** in DMPC liposomes containing [DMPC] = 100 μM, [NaDSPE-PEG2K] = 1 μM, [**RuPS<sub>L</sub>**] = 10 μM, [**NiP<sub>L</sub>**] = 20-500 nM. Conditions: CO<sub>2</sub>-saturated 0.1 M NaHCO<sub>3</sub> and 0.1 M sodium ascorbate (3 mL, pH = 6.7) at 25 °C under visible light irradiation (λ > 400 nm, AM 1.5G, 100 mW cm<sup>-2</sup>). Experiments were performed in triplicates. See Tables S7 and S8 for further information.

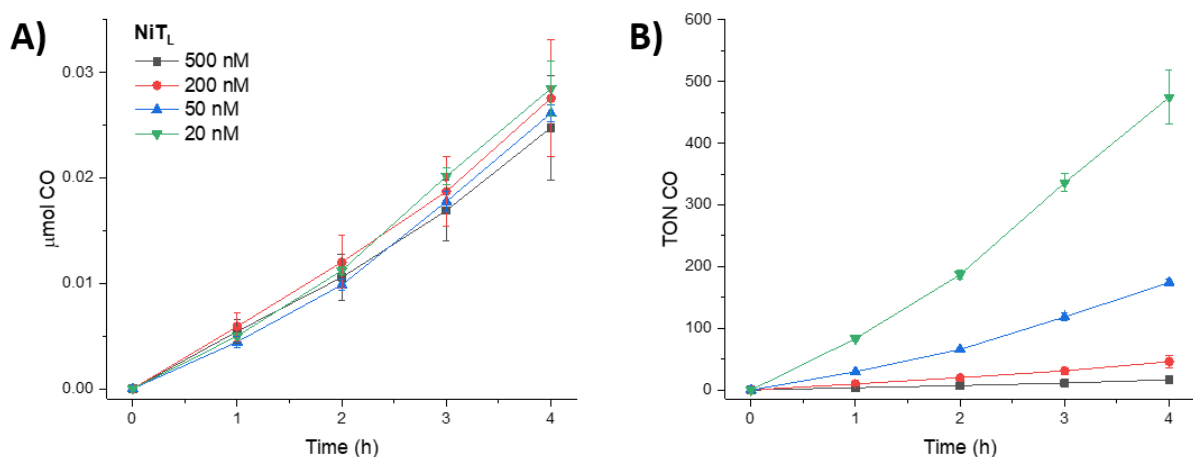

**Figure S21.** CO formation as a function of time and concentration of **NiT<sub>L</sub>** in DMPC liposomes containing [DMPC] = 100 μM, [NaDSPE-PEG2K] = 1 μM, [**RuPS<sub>L</sub>**] = 10 μM, [**NiT<sub>L</sub>**] = 20-500 nM. Conditions: CO<sub>2</sub>-saturated 0.1 M NaHCO<sub>3</sub> and 0.1 M sodium ascorbate (3 mL, pH = 6.7) at 25 °C under visible light irradiation (λ > 400 nm, AM 1.5G, 100 mW cm<sup>-2</sup>). Experiments were performed in triplicates. See Tables S7 and S8 for further information.

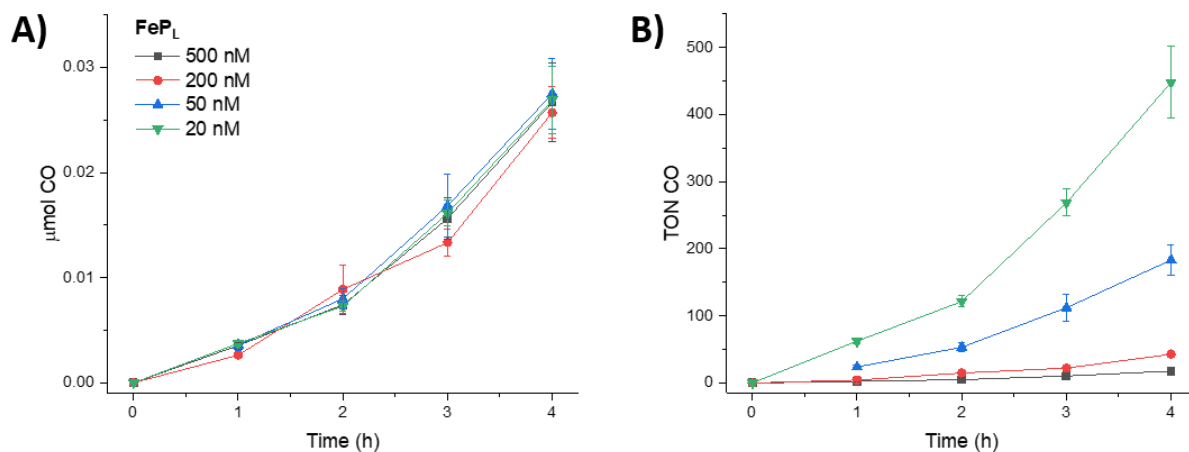

**Figure S22.** CO formation as a function of time and concentration of  $\text{FeP}_L$  in DMPC liposomes containing  $[\text{DMPC}] = 100 \mu\text{M}$ ,  $[\text{NaDSPE-PEG2K}] = 1 \mu\text{M}$ ,  $[\text{RuPS}_L] = 10 \mu\text{M}$ ,  $[\text{FeP}_L] = 20\text{-}500$  nM. Conditions:  $\text{CO}_2$ -saturated  $0.1 \text{ M NaHCO}_3$  and  $0.1 \text{ M}$  sodium ascorbate ( $3 \text{ mL}$ ,  $\text{pH} = 6.7$ ) at  $25 \text{ }^\circ\text{C}$  under visible light irradiation ( $\lambda > 400 \text{ nm}$ , AM  $1.5\text{G}$ ,  $100 \text{ mW cm}^{-2}$ ). Experiments were performed in triplicates. See Tables S7 and S8 for further information.

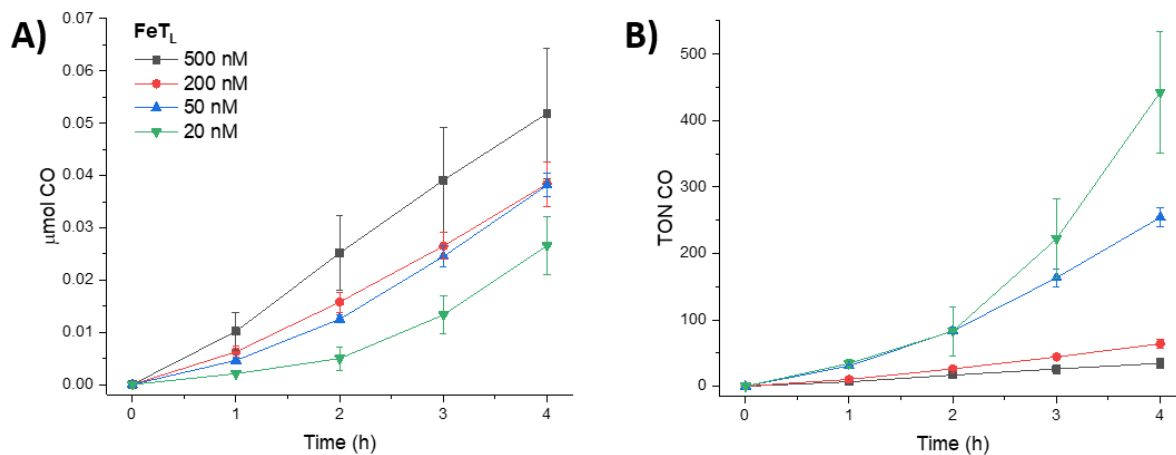

**Figure S23.** CO formation as a function of time and concentration of  $\text{FeT}_L$  in DMPC liposomes containing  $[\text{DMPC}] = 100 \mu\text{M}$ ,  $[\text{NaDSPE-PEG2K}] = 1 \mu\text{M}$ ,  $[\text{RuPS}_L] = 10 \mu\text{M}$ ,  $[\text{FeT}_L] = 20\text{-}500$  nM. Conditions:  $\text{CO}_2$ -saturated  $0.1 \text{ M NaHCO}_3$  and  $0.1 \text{ M}$  sodium ascorbate ( $3 \text{ mL}$ ,  $\text{pH} = 6.7$ ) at  $25 \text{ }^\circ\text{C}$  under visible light irradiation ( $\lambda > 400 \text{ nm}$ , AM  $1.5\text{G}$ ,  $100 \text{ mW cm}^{-2}$ ). Experiments were performed in triplicates. See Tables S7 and S8 for further information.



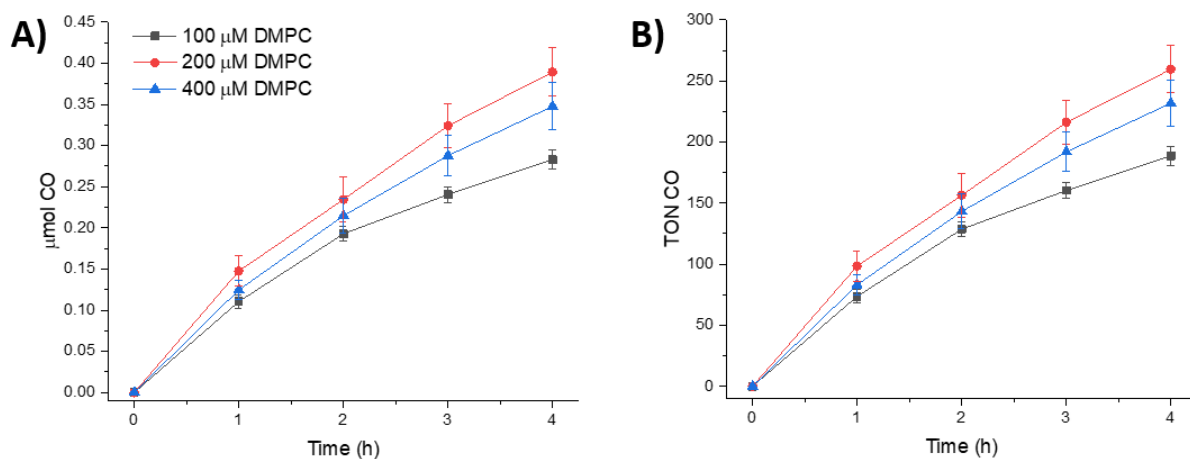

**Figure S24.** CO formation as a function of time and concentration of DMPC in liposomes containing [DMPC] = 100-400 μM, [NaDSPE-PEG2K] = 1-4 μM, [RuPS<sub>L</sub>] = 10 μM, [CoP<sub>L</sub>] = 500 nM. Conditions: CO<sub>2</sub>-saturated 0.1 M NaHCO<sub>3</sub> and 0.1 M sodium ascorbate (3 mL, pH = 6.7) at 25 °C under visible light irradiation ( $\lambda > 400$  nm, AM 1.5G, 100 mW cm<sup>-2</sup>). Experiments were performed in triplicates. See Table S13 for further information.

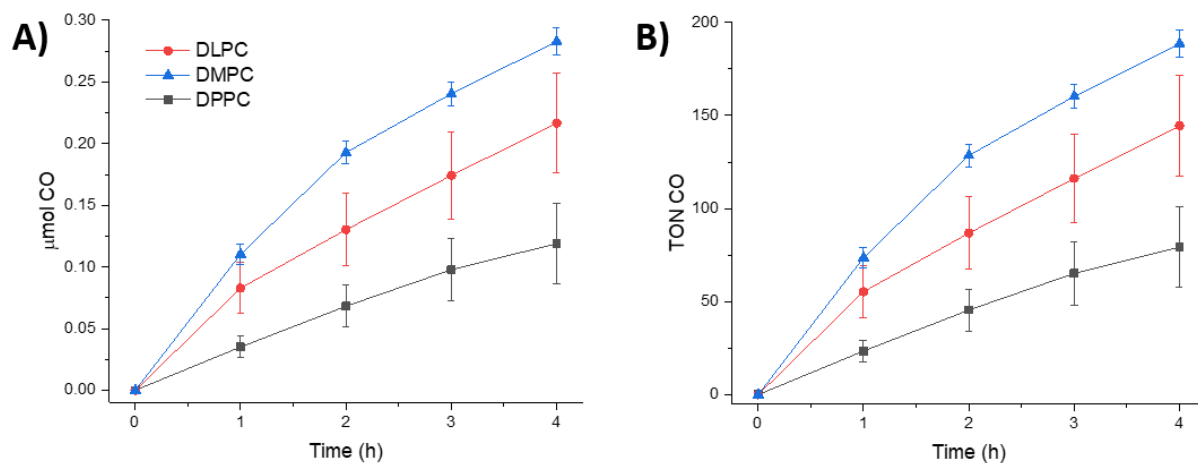

**Figure S25.** Comparison of CO formation between DLPC, DMPC and DPPC liposomes containing [lipid] = 100 μM, [NaDSPE-PEG2K] = 1 μM, [RuPS<sub>L</sub>] = 10 μM, [CoP<sub>L</sub>] = 500 nM. Conditions: four-hour visible light irradiation experiments in triplicates ( $\lambda > 400$  nm, AM 1.5G, 100 mW cm<sup>-2</sup>), CO<sub>2</sub>-saturated 0.1M NaHCO<sub>3</sub> and 0.1 M sodium ascorbate at 25 °C. N.B. for further details see Supplementary Note 1 and Table S13 in sections above.

## Isotopic labeling control experiment

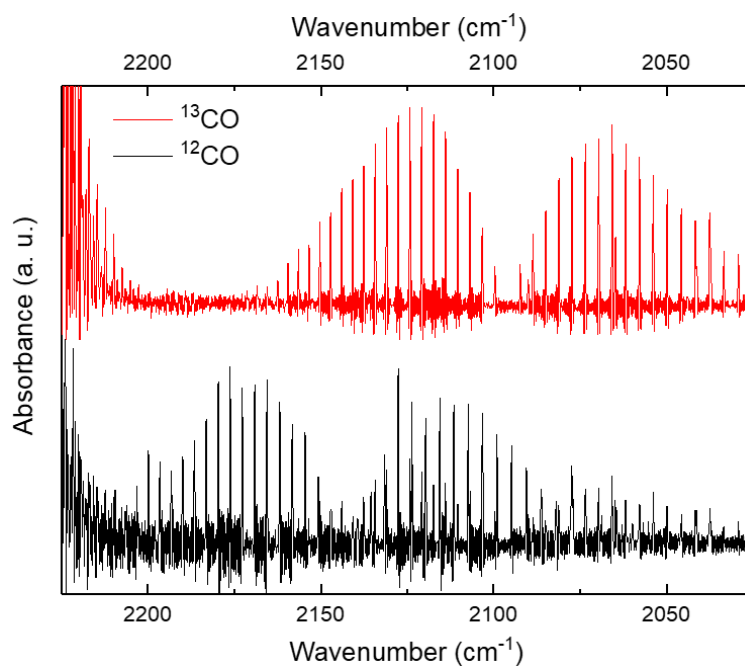

**Figure S26.** IR absorbance spectra of isotopic labeling experiments of the gaseous products obtained from (red) <sup>13</sup>CO<sub>2</sub> and (black) <sup>12</sup>CO<sub>2</sub> after 4 h of photocatalysis of catalyst **CoP<sub>L</sub>** in DMPC liposomes. Conditions: [DMPC] = 100 μM, [NaDSPE-PEG2K] = 1 μM, [RuPS<sub>L</sub>] = 10 μM, [CoP<sub>L</sub>] = 500 nM, 0.1 M sodium ascorbate, <sup>13</sup>CO<sub>2</sub>-saturated 0.1 M NaH<sub>2</sub>PO<sub>4</sub> (red) or <sup>12</sup>CO<sub>2</sub>-saturated 0.1 M NaH<sup>12</sup>CO<sub>3</sub> (black).

## UV-vis spectra of before and after light irradiation of molecule containing DMPC liposomes

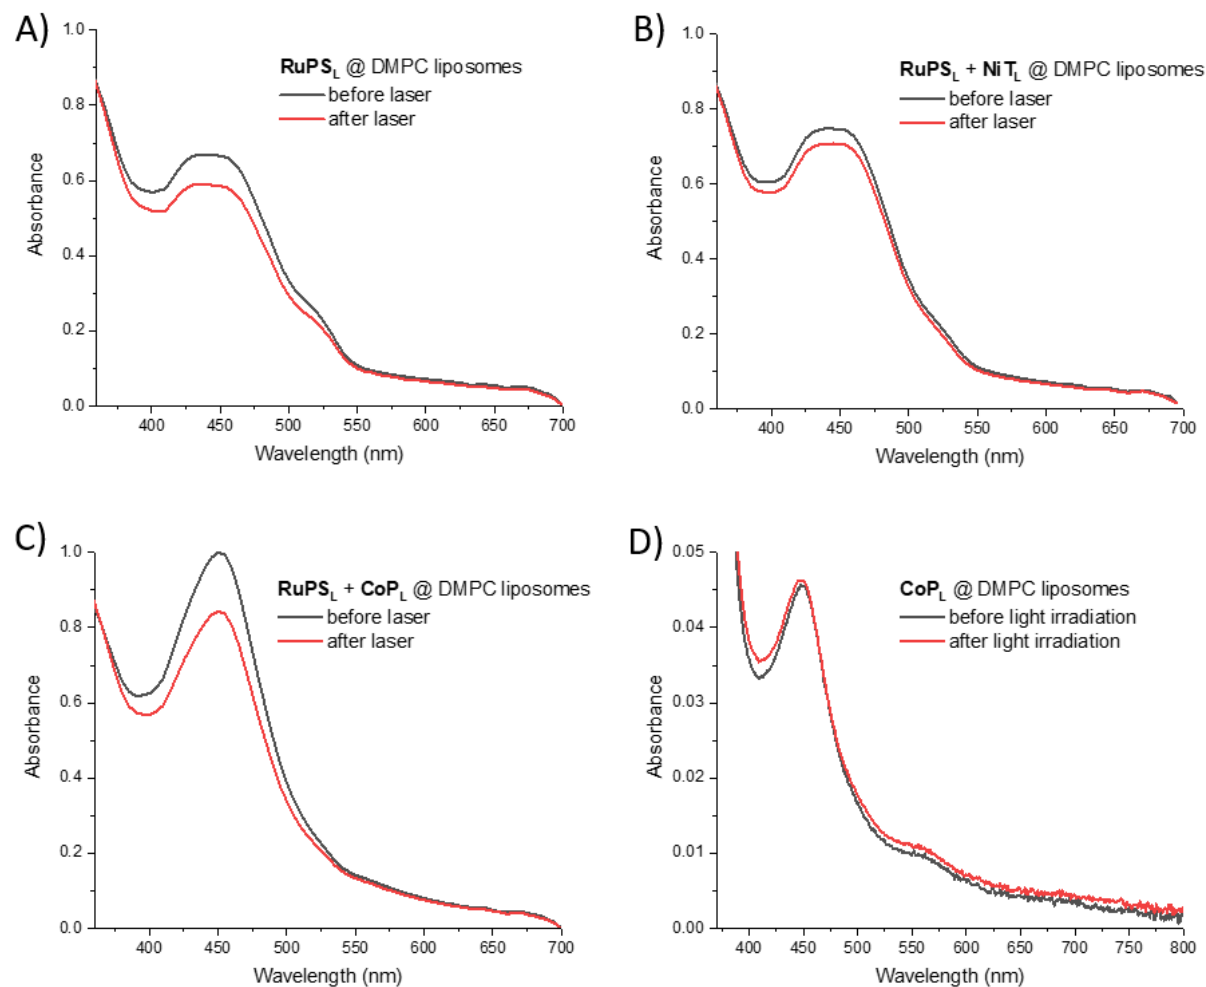

**Figure S27.** Comparison of UV-vis absorption spectra (black) before and (red) after (A, B and C) laser photolysis or (D) light irradiation of DMPC liposome solutions in the presence of 0.1 M sodium ascorbate in (A, B and C) Ar-saturated or (D) CO<sub>2</sub>-saturated 0.1 M NaHCO<sub>3</sub>. Experimental conditions: (A) [DMPC]=100 μM, [NaDSPE-PEG2K] =1 μM, [RuPS<sub>L</sub>] = 10 μM. (B) [DMPC]=100 μM, [NaDSPE-PEG2K] =1 μM, [RuPS<sub>L</sub>] = 10 μM, [NiT<sub>L</sub>] = 500 nM. (C) [DMPC]=100 μM, [NaDSPE-PEG2K] =1 μM, [RuPS<sub>L</sub>] = 10 μM, [CoP<sub>L</sub>] = 500 nM. (D) [DMPC]=100 μM, [NaDSPE-PEG2K] =1 μM, [CoP<sub>L</sub>] = 500 nM.

## Reductive quenching studies

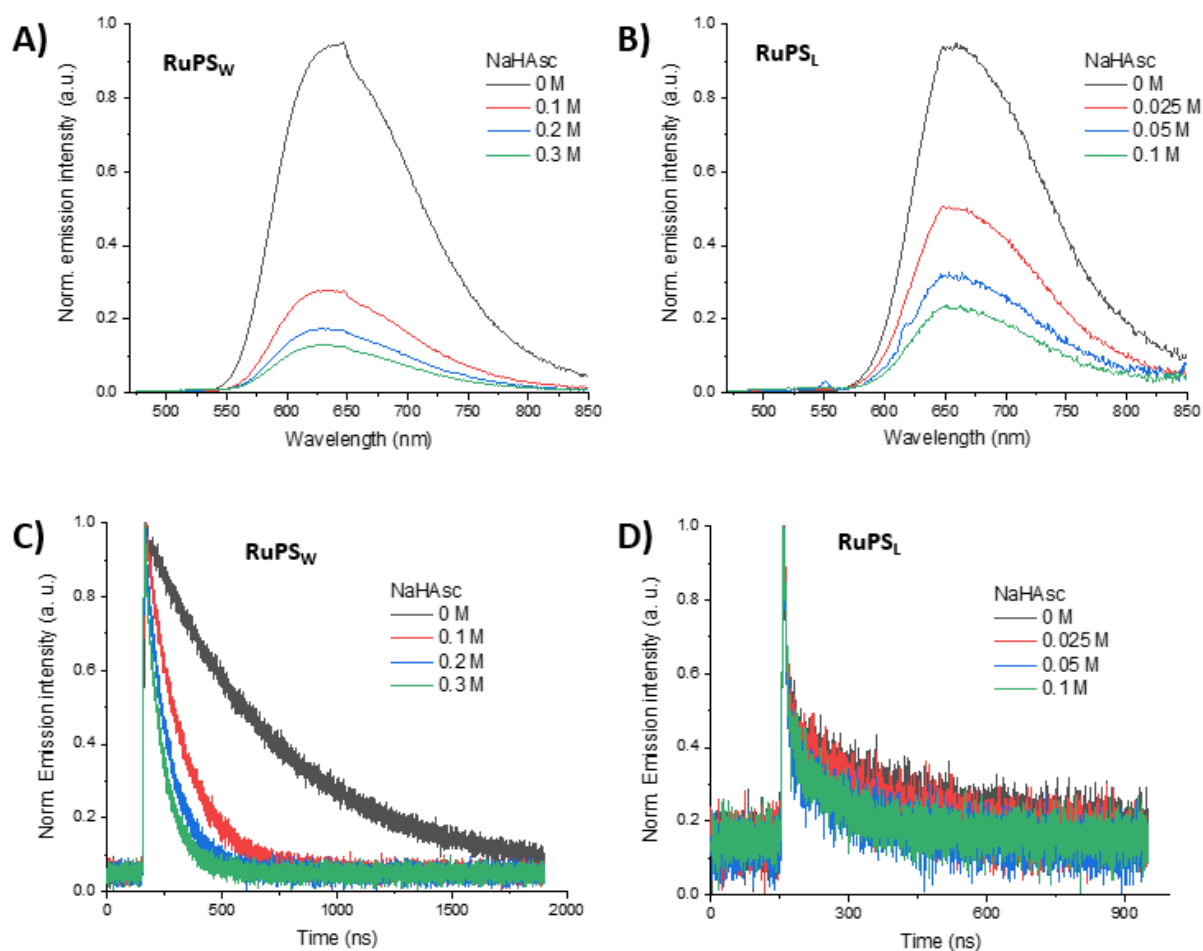

**Figure S28.** Normalized (A and B) emission intensity and (C and D) time-resolved emission intensity of photosensitizers **RuPS<sub>w</sub>** and **RuPS<sub>L</sub>** by sodium ascorbate (NaHAsc), determined by stationary fluorimetry (excitation at 460 nm, detection wavelength at 650 nm) in homogenous environment and liposomes. Experimental homogenous conditions (A and C): **[RuPS<sub>w</sub>]** = 30  $\mu$ M in 0.1 M NaHCO<sub>3</sub> buffer. Experimental liposome conditions (B and D): **[DMPC]**=100  $\mu$ M, **[NaDSPE-PEG2K]** =1  $\mu$ M, **[RuPS<sub>L</sub>]** = 10  $\mu$ M in 0.1 M NaHCO<sub>3</sub> buffer. All solutions were purged with Ar before measurements. NB: The emission intensity decreases successively with addition of increasing concentrations of NaHAsc in both homogeneous and liposomal systems (Figure S26A-B). The observed emission lifetime in homogeneous solution shows a parallel decrease, while in liposomes the lifetime is not significantly affected, as is characteristic for so-called static quenching with pre-aggregated dye-quencher pairs (see main article).

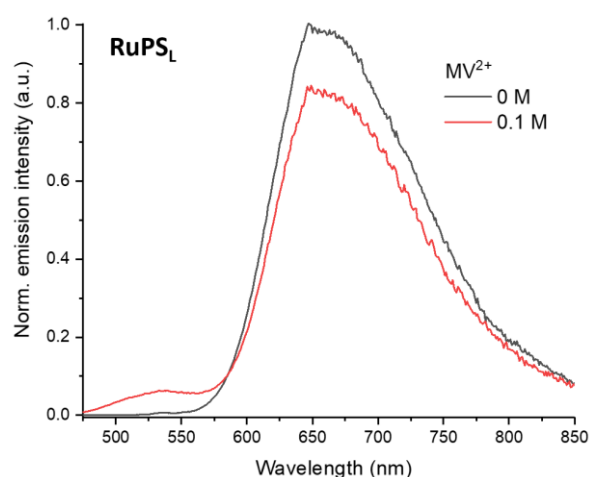

**Figure S29.** Normalized emission intensity of photosensitizer **RuPS<sub>L</sub>** by 0.1 M methyl viologen (MVCl<sub>2</sub>). Conditions liposomes: [DMPC]=100 μM, [NaDSPE-PEG2K]=1 μM, [RuPS<sub>L</sub>]= 10 μM in 0.1 M NaHCO<sub>3</sub> buffer. All solutions were purged with Ar before measurements. N.B: The emission intensity decreases modestly with the addition of cationic quencher methyl viologen in the positively-charged liposome system. The use of negatively-charged HAsc<sup>-</sup> as a quencher for positively-charged liposomes yields a larger decrease in emission intensity, and involves micro-heterogenous environments, which can enhance the quenching quantum efficiency ( $\phi = 1 - I/I_0$ ) of photosensitizer with anionic HAsc<sup>-</sup> ( $\phi = 0.74$ ) vs cationic quencher methyl viologen ( $\phi = 0.16$ ).

## Self-quenching studies

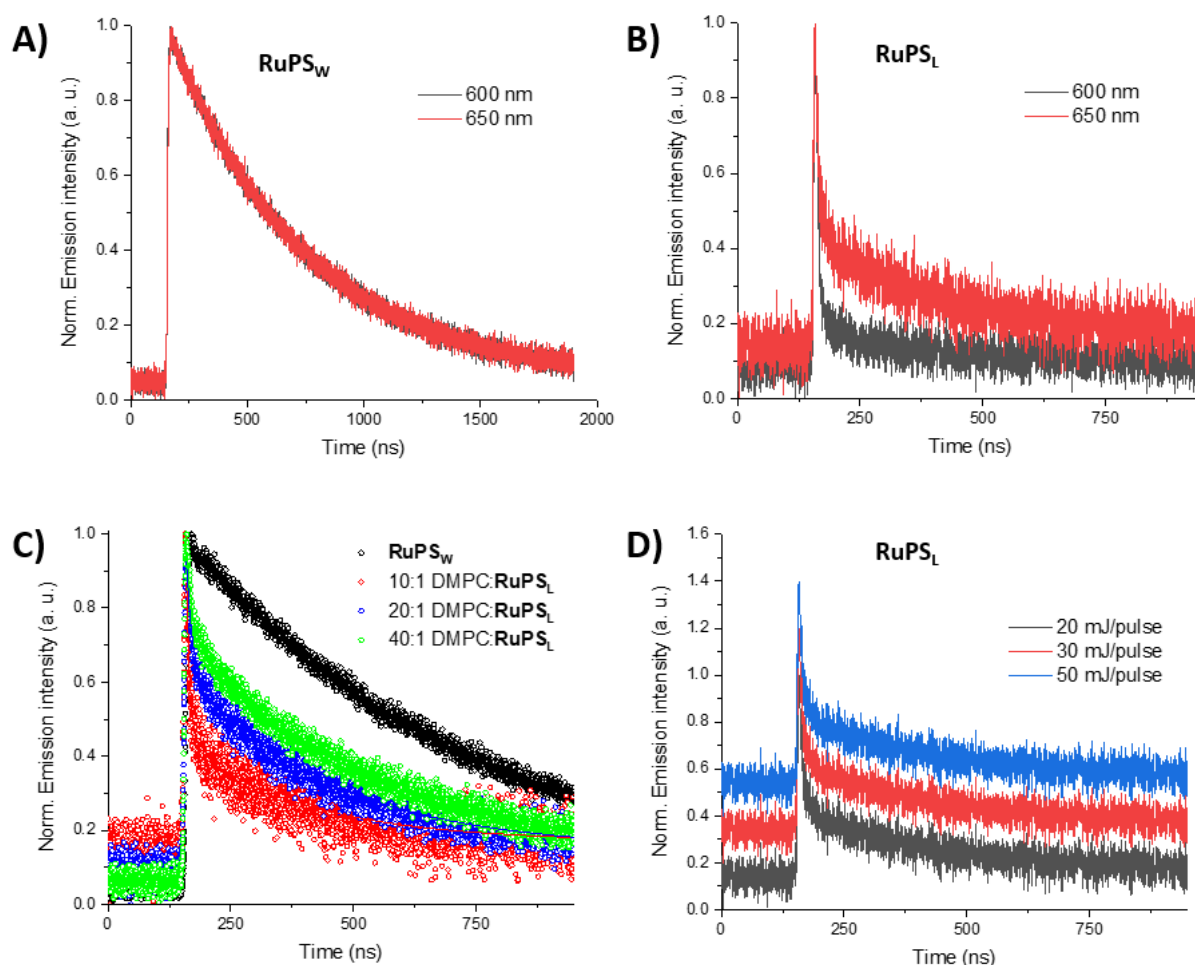

**Figure S30.** Normalized time-resolved emission intensity of (A) RuPS<sub>w</sub> and (B) RuPS<sub>L</sub> at 600 and 650 nm. Experimental homogeneous conditions (A): [RuPS<sub>w</sub>] = 30 μM, in 0.1 M NaHCO<sub>3</sub> buffer. Experimental liposome conditions (B): [DMPC]=100 μM, [NaDSPE-PEG2K] = 1 μM, [RuPS<sub>L</sub>] = 10 μM, in 0.1 M NaHCO<sub>3</sub> buffer. (C) Normalized time-resolved emission intensity at 650 nm of RuPS<sub>w</sub> (black trace) and RuPS<sub>L</sub> in liposomes with different mole ratios between DMPC and RuPS<sub>L</sub>. (D) Normalized time-resolved emission intensity at 650 nm of RuPS<sub>L</sub> in liposomes (10:1 DMPC:RuPS<sub>L</sub> ratio) using different laser excitation energies. Experimental homogeneous conditions (C): [RuPS<sub>w</sub>] = 30 μM, in 0.1 M NaHCO<sub>3</sub> buffer. Experimental liposome conditions (C and D): [DMPC]=100 μM, [NaDSPE-PEG2K] = 1 μM, [RuPS<sub>L</sub>] = 10, 5, 2.5 μM, Ar-purged 0.1 M NaHCO<sub>3</sub> buffer at 20 °C. Excitation and emission wavelengths were fixed at 460 and 650 nm, respectively. N.B. for further details see Supplementary Note 2 in section above.

## Charge separation quantum yields in homogeneous and liposome systems

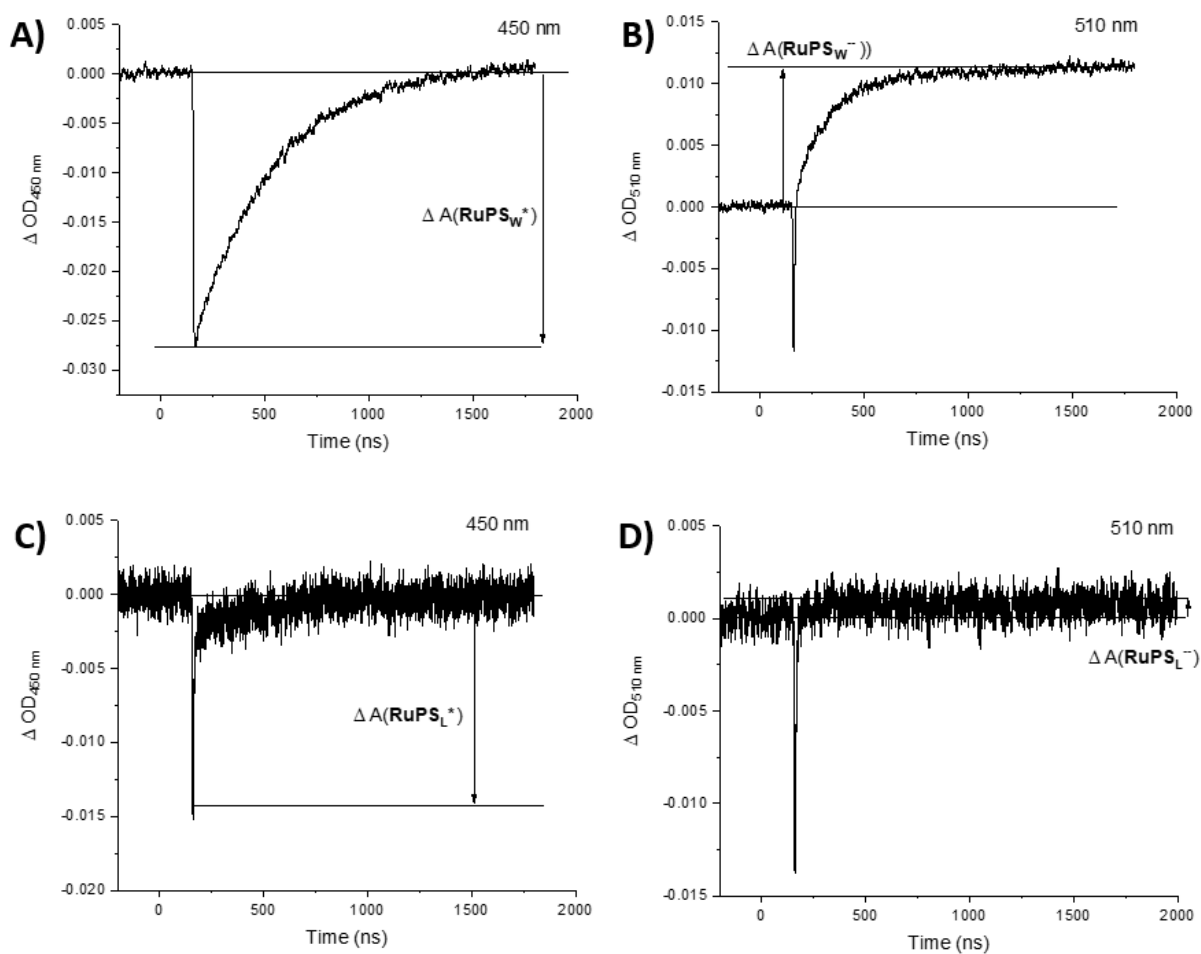

**Figure S31.** Transient absorption kinetic traces (A and C) at 450nm ( $\Delta A(\text{RuPS}_W^*)$  and  $\Delta A(\text{RuPS}_L^*)$ , respectively) and (B and D) at 510nm ( $\Delta A(\text{RuPS}_W^-)$  and  $\Delta A(\text{RuPS}_L^-)$ , respectively), after 460 nm laser excitation of (A and B) homogeneous **RuPS<sub>W</sub>** and (C and D) liposome **RuPS<sub>L</sub>** systems. Experimental homogeneous conditions (A and B): [**RuPS<sub>W</sub>**] = 20  $\mu\text{M}$  and 0.1 M sodium ascorbate in 0.1 M  $\text{NaHCO}_3$  aq. buffer. Experimental liposome conditions (C and D): [DMPC] = 100  $\mu\text{M}$ , [NaDSPE-PEG2K] = 1  $\mu\text{M}$ , [**RuPS<sub>L</sub>**] = 10  $\mu\text{M}$  and 0.1 M ascorbate in 0.1 M  $\text{NaHCO}_3$  aq. buffer. . N.B. for further details see Supplementary Note 3 in section above.

## Monitoring the generation of RuPS<sup>-</sup> in homogeneous and charge separation lifetimes in liposomes

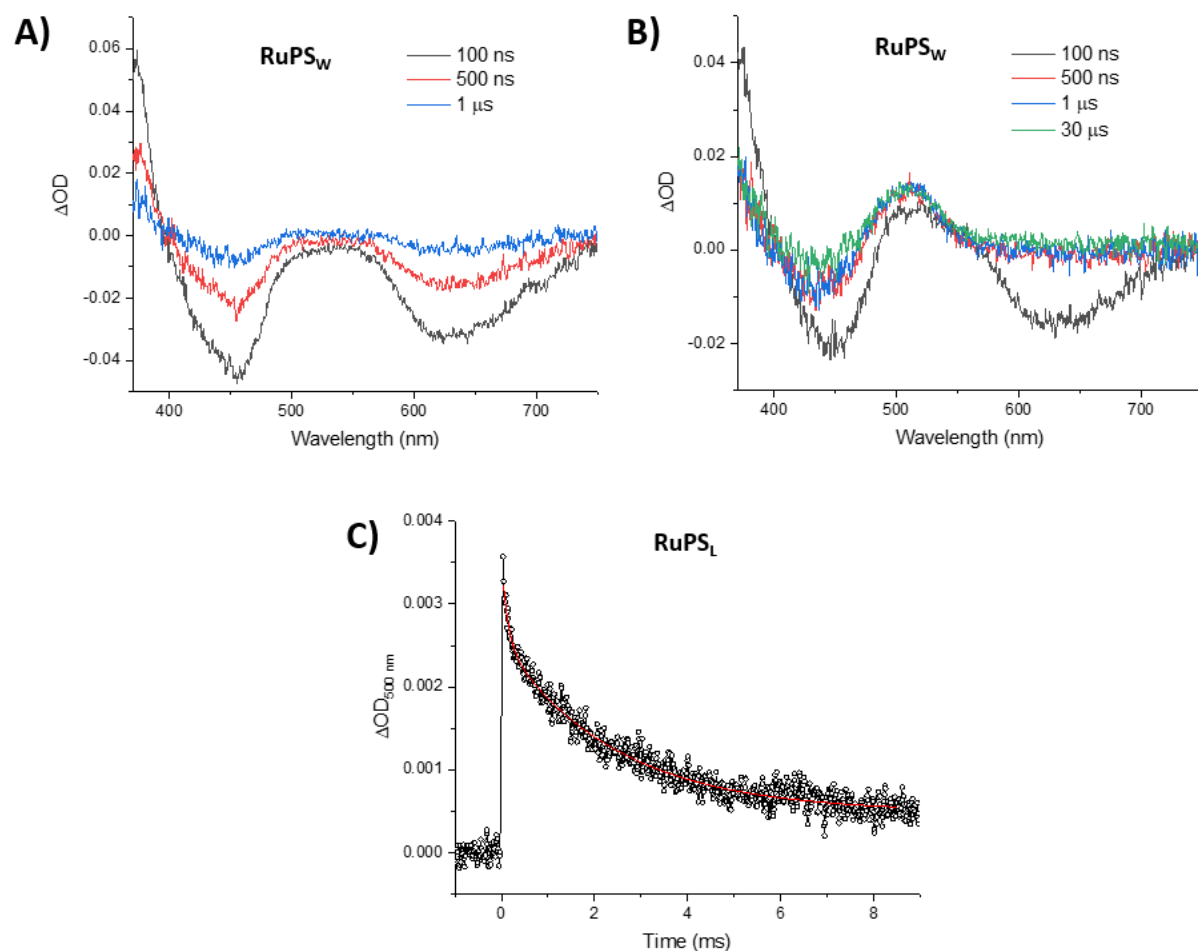

**Figure S32.** Transient difference absorption spectra of homogeneous RuPS<sub>w</sub> system (A) without and (B) with 0.1 M NaHAsc, following 460 nm laser excitation (1 Hz, 10 mJ/pulse) at different durations in a degassed solution. (C) Transient different absorption kinetic trace collected at 500 nm after laser excitation in 10 ms timescale for RuPS<sub>L</sub> in DMPC liposomes. Experimental homogeneous conditions: (A) 30 μM RuPS<sub>w</sub> in 0.1 M NaHCO<sub>3</sub> buffer or (B) 30 μM RuPS<sub>w</sub> and 0.1 M NaHAsc in 0.1 M NaHCO<sub>3</sub> buffer. Experimental liposomes conditions (C): [DMPC]=100 μM, [NaDSPE-PEG2K] =1 μM, [RuPS<sub>L</sub>] = 10 μM and 0.1 M NaHAsc in 0.1 M NaHCO<sub>3</sub> buffer.



### Kinetic studies between RuPS<sup>-</sup> and catalysts in homogeneous and liposomes

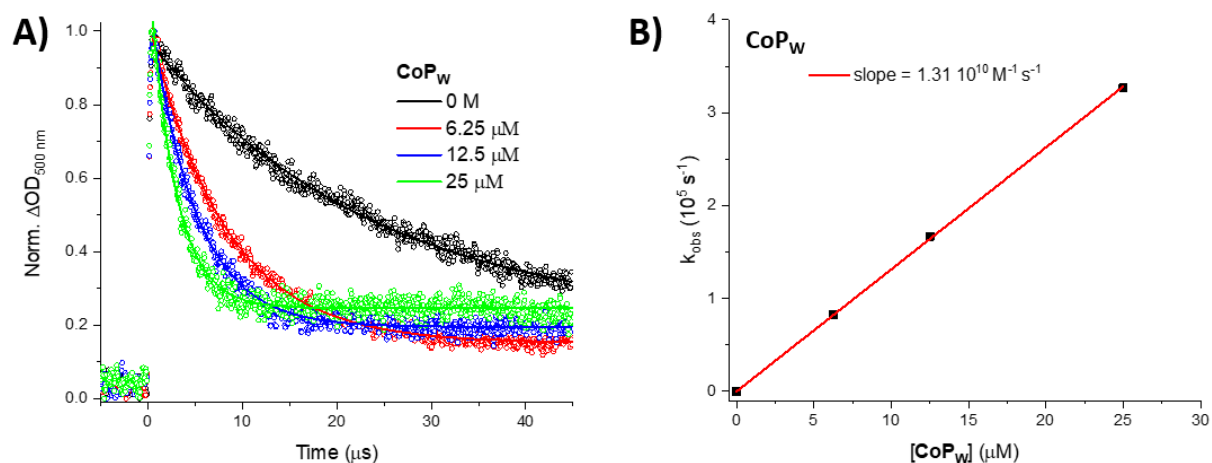

**Figure S33.** (A) Normalized kinetic traces at 500 nm (original  $\Delta OD \approx 0.03$ ) obtained at different  $[CoP_w]$  and (B) observed rates vs the concentrations for the calculation of the bimolecular rate constants between  $RuPS_w$  and  $CoP_w$ . Experimental conditions:  $[CoP_w] = 0\text{-}25 \mu\text{M}$ ,  $[RuPS_w] = 30 \mu\text{M}$  and 0.1 M sodium ascorbate in 0.1 M  $NaHCO_3$  aq. buffer.

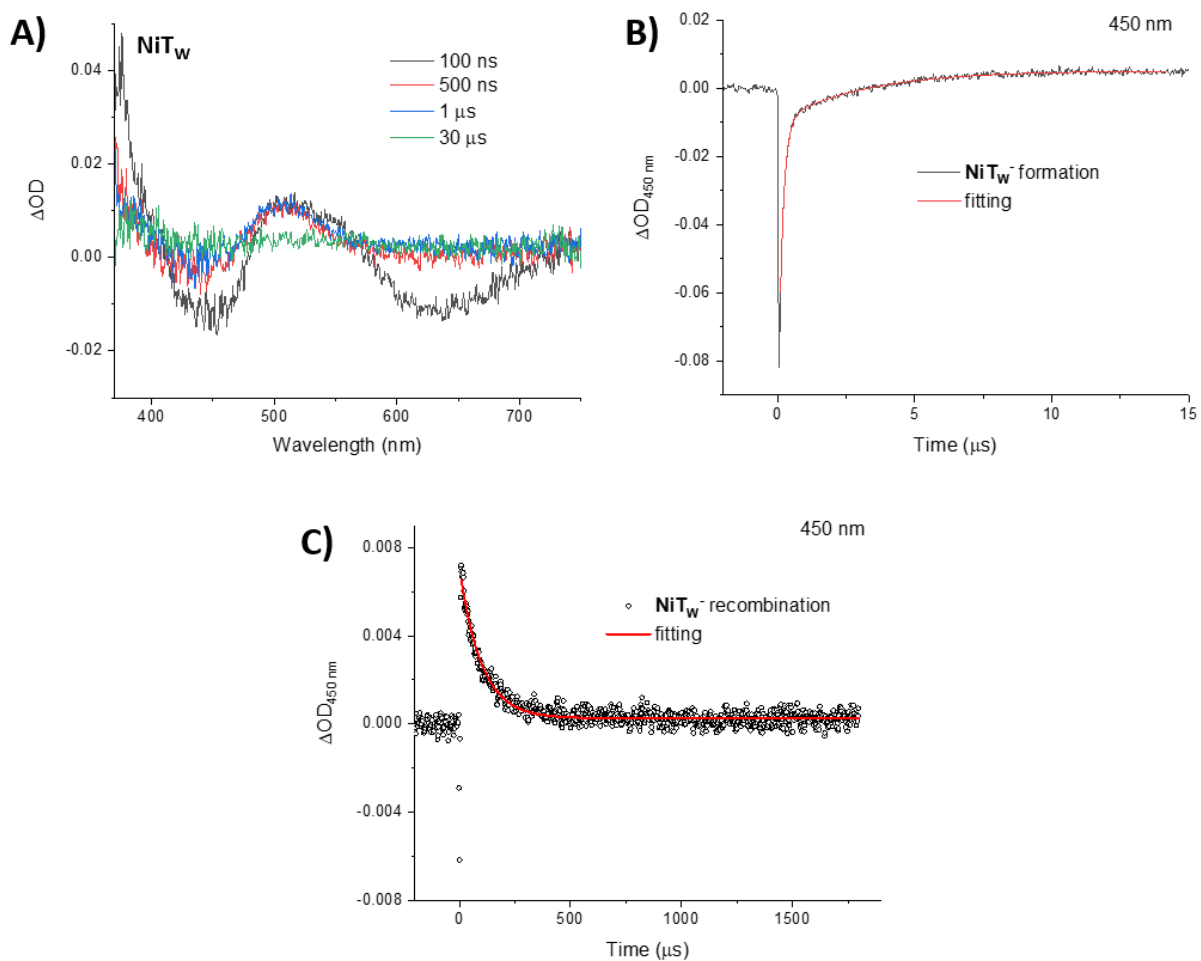

**Figure S34.** (A) Difference absorption spectra obtained after 460 nm laser excitation (1 Hz, 10 mJ/pulse) of a homogeneous solution containing  $\text{RuPS}_w$  and  $\text{NiT}_w$ . (B and C) Transient absorption kinetic traces collected at 450 nm after 460 nm laser excitation (1 Hz, 10 mJ/pulse) at 20  $\mu\text{s}$  and 2000  $\mu\text{s}$  timescale, respectively. Experimental homogeneous conditions:  $[\text{RuPS}_w] = 30\ \mu\text{M}$ ,  $[\text{NiT}_w] = 100\ \mu\text{M}$ , 0.1 M sodium ascorbate, Ar-saturated 0.1 M  $\text{NaHCO}_3$ .

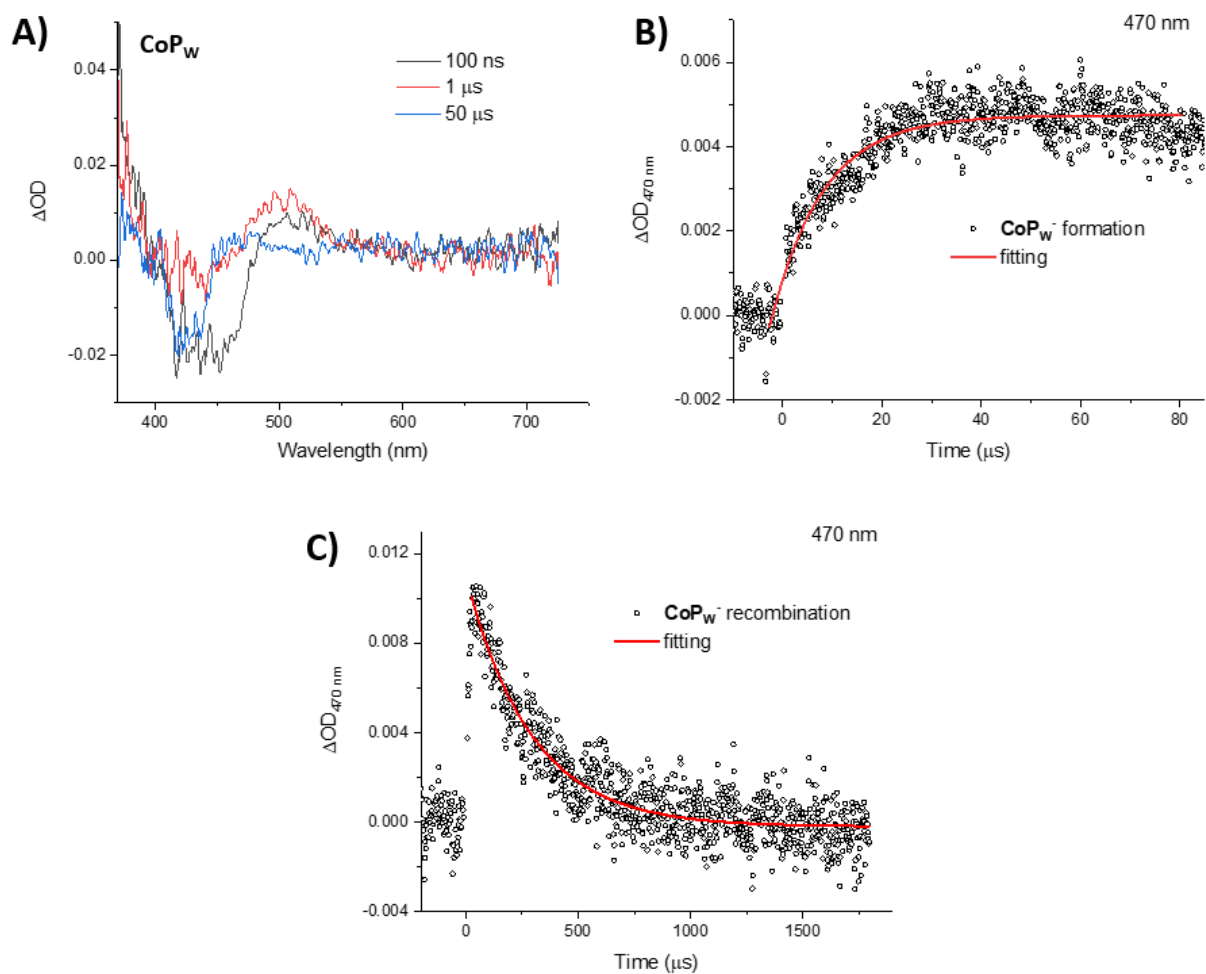

**Figure S35.** (A) Difference absorption spectra obtained after 460 nm laser excitation (1 Hz, 10 mJ/pulse) of a homogeneous solution containing  $\text{RuPS}_w$  and  $\text{CoP}_w$ . (B and C) Transient absorption kinetic traces collected at 470 nm after 460 nm laser excitation (1 Hz, 10 mJ/pulse) at 100  $\mu\text{s}$  and 2000  $\mu\text{s}$  timescale, respectively. Experimental homogeneous conditions:  $[\text{RuPS}_w] = 30 \mu\text{M}$ ,  $[\text{CoP}_w] = 10 \mu\text{M}$ , 0.1 M sodium ascorbate, Ar-saturated 0.1 M  $\text{NaHCO}_3$ .

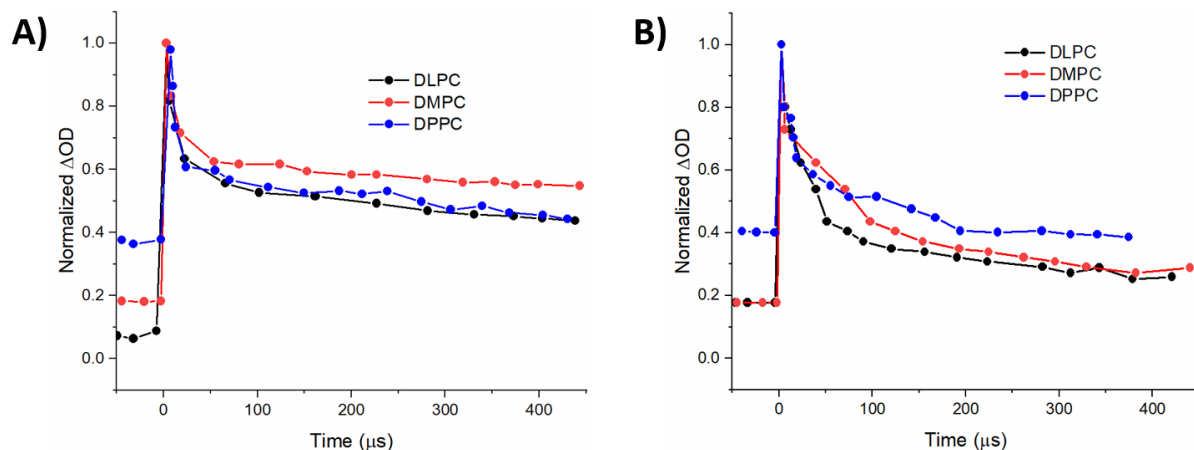

**Figure S36.** Comparison of normalized kinetic traces at 500 nm obtained from liposomes containing DLPC, DMPC and DPPC. Experimental conditions: (A) [Lipid] = 100  $\mu$ M, [NaDSPE-PEG2K] = 1  $\mu$ M, [RuPS<sub>L</sub>] = 10  $\mu$ M, 0.1 M sodium ascorbate, Ar-saturated 0.1 M NaHCO<sub>3</sub>. (B) [Lipid] = 100  $\mu$ M, [NaDSPE-PEG2K] = 1  $\mu$ M, [RuPS<sub>L</sub>] = 10  $\mu$ M, [NiT<sub>L</sub>] = 2  $\mu$ M, 0.1 M sodium ascorbate, Ar-saturated 0.1 M NaHCO<sub>3</sub>. N.B. for further details see Supplementary Note 1 in section above.

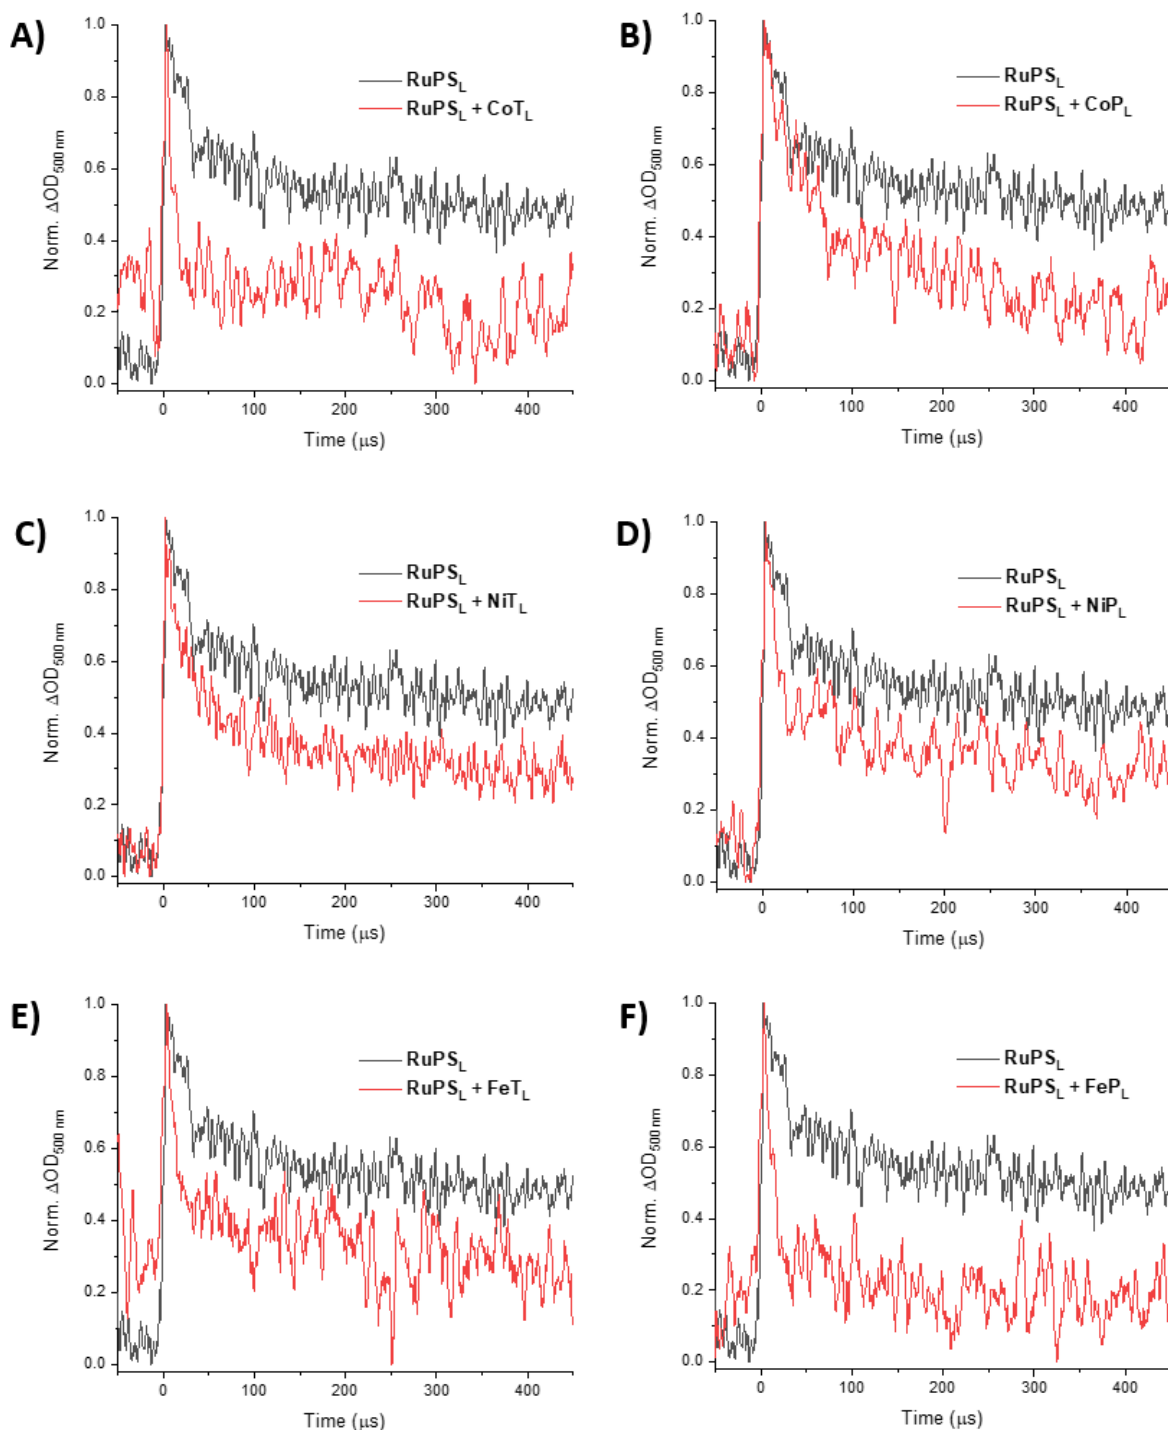

**Figure S37.** Normalized kinetic traces at 500 nm (original  $\Delta OD \approx 0.002$ ) of **RuPS<sub>L</sub>** without alkylated catalyst (black line) and **RuPS<sub>L</sub>** with one of the six different alkylated catalysts (red line) in DMPC liposomes. Experimental conditions: [DMPC]=100  $\mu\text{M}$ , [NaDSPE-PEG2K] = 1  $\mu\text{M}$ , [**RuPS<sub>L</sub>**] = 10  $\mu\text{M}$ , [**CoT<sub>L</sub>**] = [**NiT<sub>L</sub>**] = [**FeT<sub>L</sub>**] = [**CoP<sub>L</sub>**] = [**NiP<sub>L</sub>**] = [**FeP<sub>L</sub>**] = 500 nM and 0.1 M sodium ascorbate in 0.1 M  $\text{NaHCO}_3$  aq. buffer.

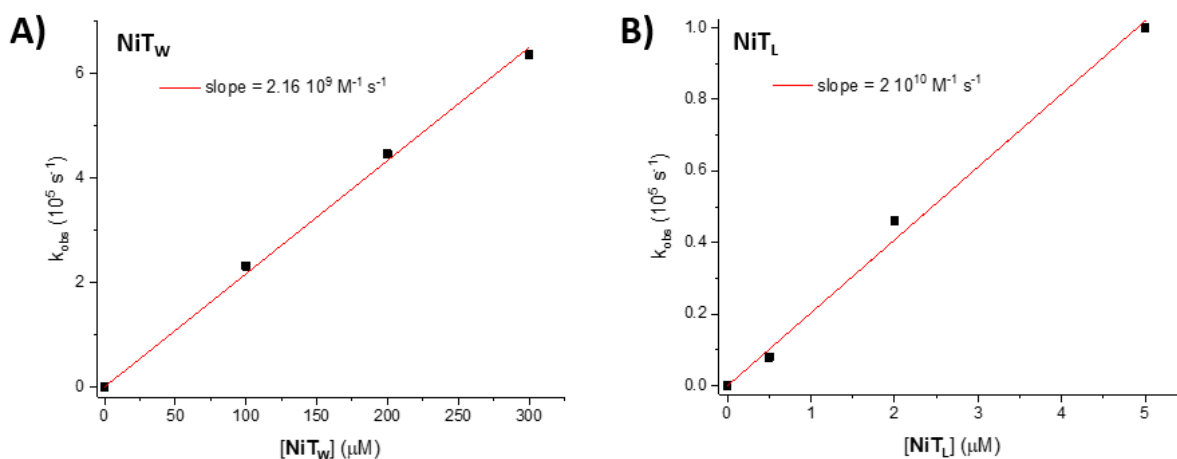

**Figure S38.** Observed rate constants (A)  $k_{obs}$  vs  $[\text{NiT}_w]$  or (B)  $k_{obs}$  vs  $[\text{NiT}_L]$ , employed to calculate the bimolecular electron transfer rate constants  $K_{ET}$  (i.e. slope). Experimental homogeneous conditions (A):  $[\text{RuPS}_w] = 30 \mu\text{M}$  and 0.1 M NaHAsc in Ar-saturated 0.1 M  $\text{NaHCO}_3$  aq. buffer. Experimental liposome conditions:  $[\text{DMPC}] = 100 \mu\text{M}$ ,  $[\text{NaDSPE-PEG2K}] = 1 \mu\text{M}$ ,  $[\text{RuPS}_L] = 10 \mu\text{M}$  and 0.1 M NaHAsc in Ar-saturated 0.1 M  $\text{NaHCO}_3$  aq. buffer.

## Square wave voltammetry and chronoamperometry

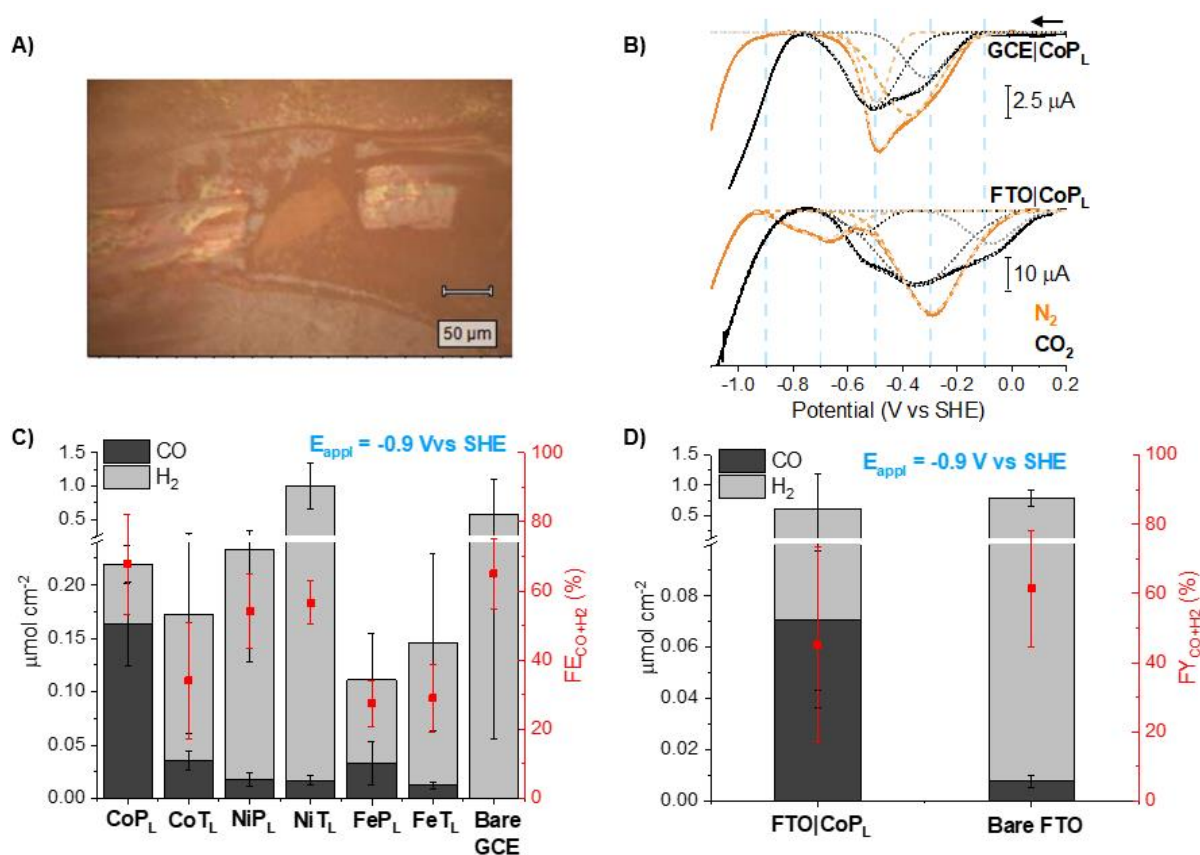

**Figure S39.** (A) Optical microscope image of a **CoP<sub>L</sub>** film on FTO. (B) SWV scans comparing **CoP<sub>L</sub>** dropcasted on glassy carbon electrode (GCE) (top) and fluorine-doped tin oxide (FTO) (bottom) in  $N_2$ - and  $CO_2$ -saturated 0.1 M  $NaHCO_3$ . (C) Chronoamperometry results of all alkylated catalysts dropcasted on GCE and bare GCE (no Cat., i.e. without catalysts) at  $E_{app} = -0.9$  V vs SHE for 4 h in  $CO_2$ -saturated 0.1 M  $NaHCO_3$ . (D) Chronoamperometry results of **FTO|CoP<sub>L</sub>** and bare FTO (no **CoP<sub>L</sub>**) conducted at an applied potential ( $E_{app}$ ) of  $-0.9$  V vs SHE for four hours in  $CO_2$ -saturated 0.1 M  $NaHCO_3$  solution (pH = 6.7) at room temperature. N.B. for further details see Supplementary Note in section above.

## UV-vis-NIR spectroelectrochemistry

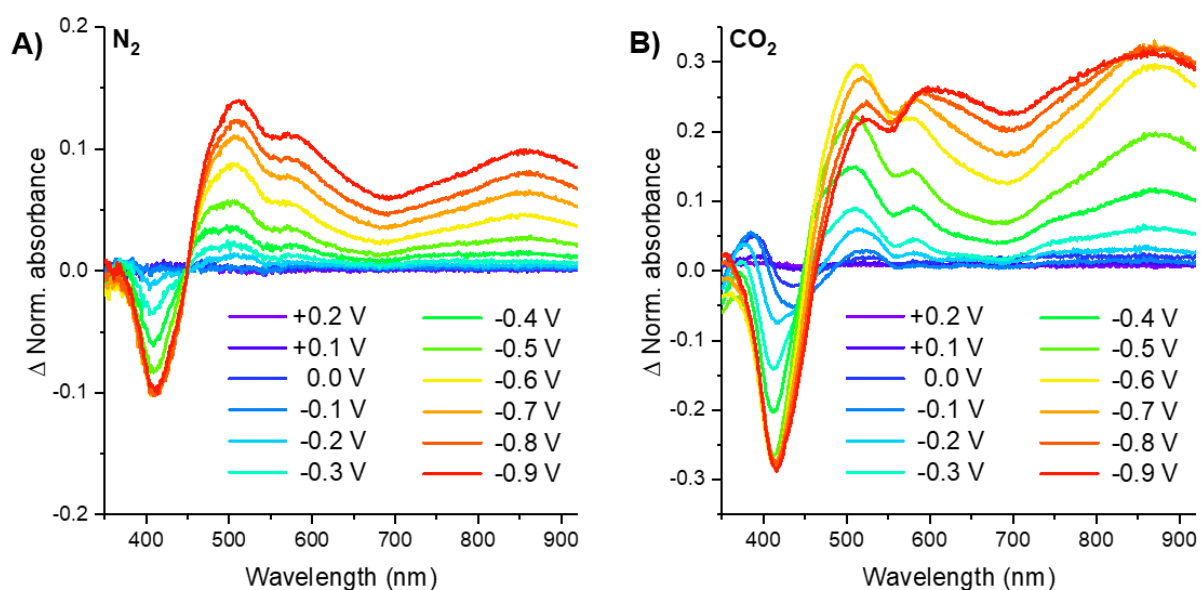

**Figure S40.** Variation UV-vis-NIR SEC of **CoP<sub>L</sub>** droptcasted on FTO in (A)  $N_2$ - and (B)  $CO_2$ -saturated 0.1 M  $NaHCO_3$ .

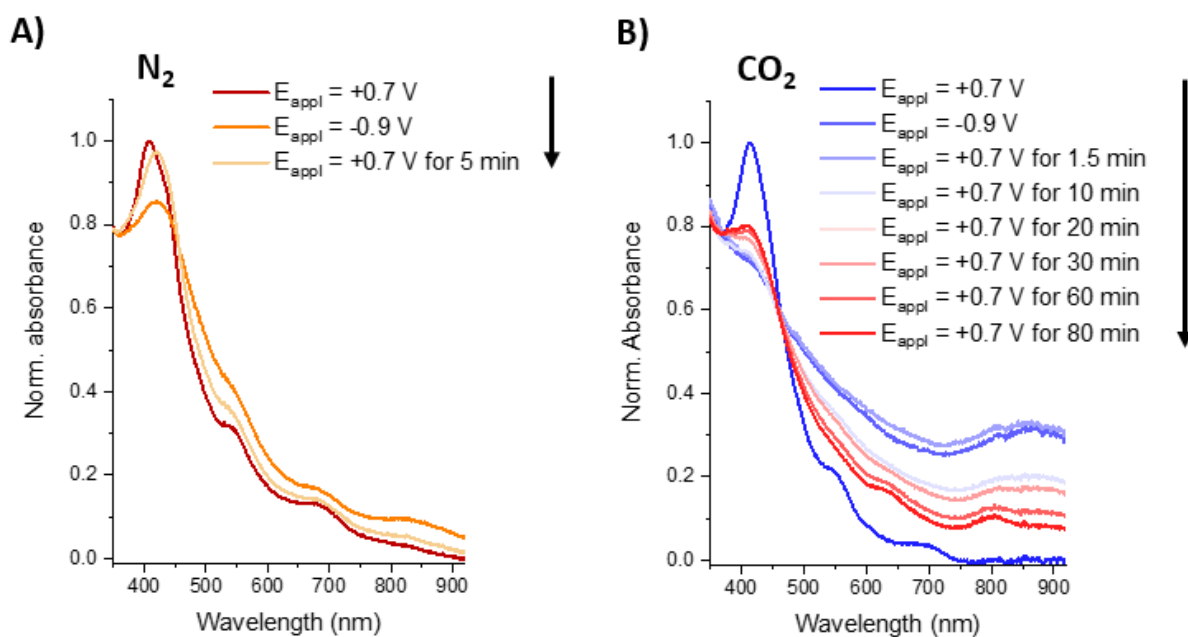

**Figure S41.** UV-vis-NIR SEC of re-oxidized **CoP<sub>L</sub>** films on FTO, after  $E_{appl} = -0.9$  V was applied for one minute, in (A)  $N_2$ - and (B)  $CO_2$ -saturated 0.1 M  $NaHCO_3$ . Note: further oxidation of reduced **CoP<sub>L</sub>** film in the presence of  $N_2$  (A) did not lead to further changes in the absorption features of the film. N.B. for further details see Supplementary Note 6 in section above.



## Resonance Raman spectroelectrochemistry

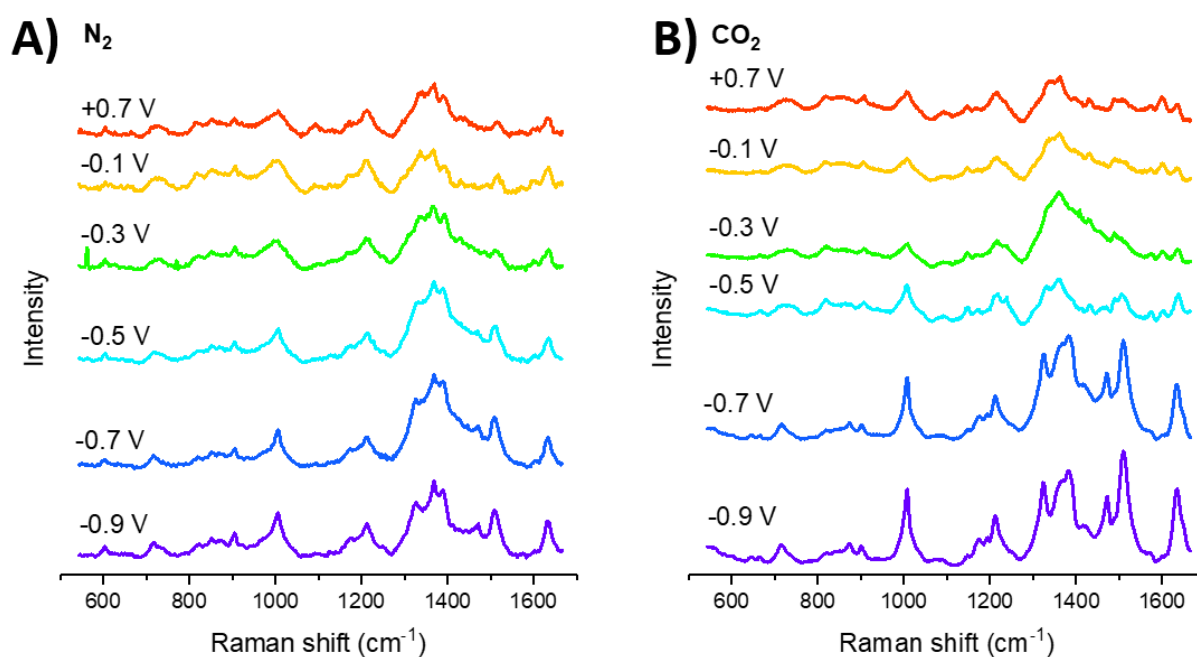

**Figure S42.** Resonance Raman SEC in (A)  $N_2$ - and (B)  $CO_2$ -saturated 0.1 M  $NaHCO_3$ .

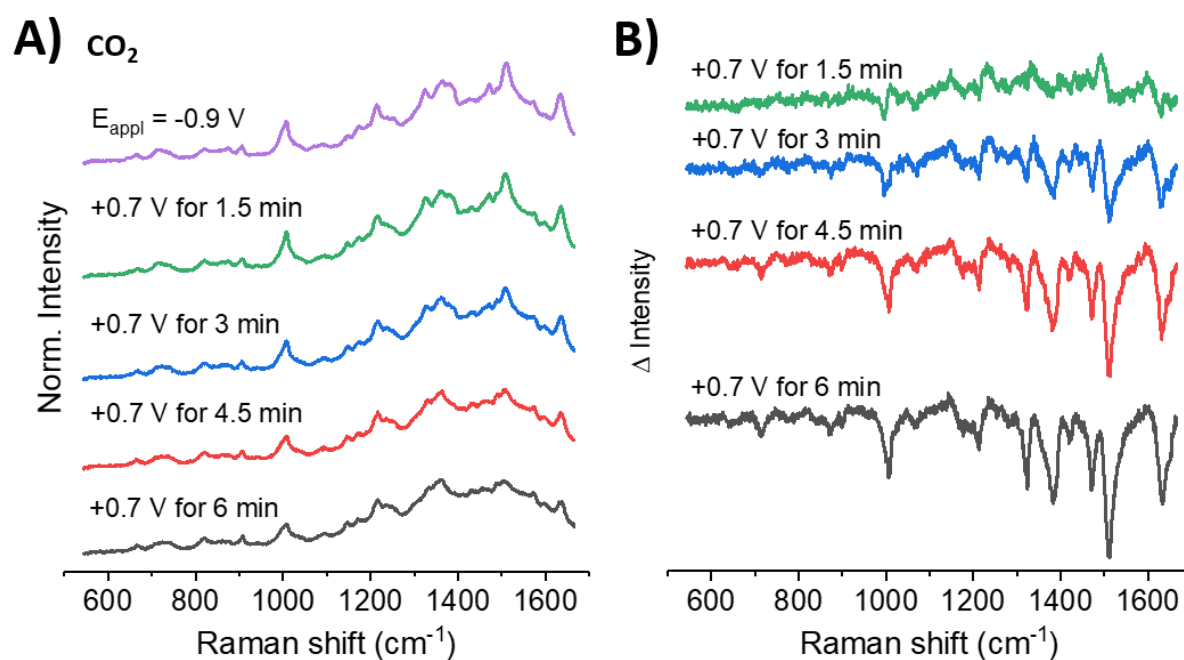

**Figure S43.** (A) Resonance Raman SEC of re-oxidized  $CoP_L$  films on FTO, after  $E_{app} = -0.9$  V vs SHE was applied for one minute, in  $CO_2$ -saturated 0.1 M  $NaHCO_3$ . (B) Difference Resonance Raman SEC of the same spectra shown in plot A. The difference spectra were obtained by subtracting the reduced species spectrum ( $-0.9$  V) from each spectrum. NB. for further details about these results see above Supplementary Note 6.

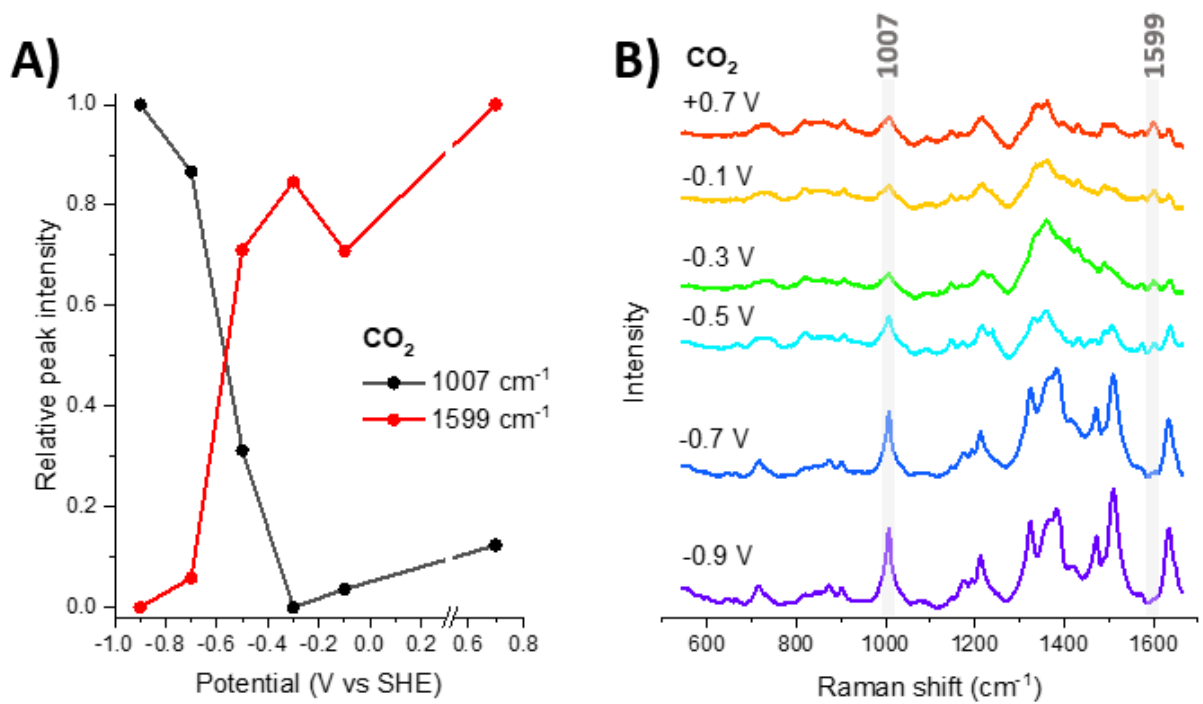

**Figure S44.** (A) Relative peak intensity vs applied potential for peaks at 1007 and 1599 cm<sup>-1</sup> and (B) Raman SEC highlighting the two monitored peaks in CO<sub>2</sub>-saturated 0.1 M NaHCO<sub>3</sub>.

## DFT calculated Raman spectra

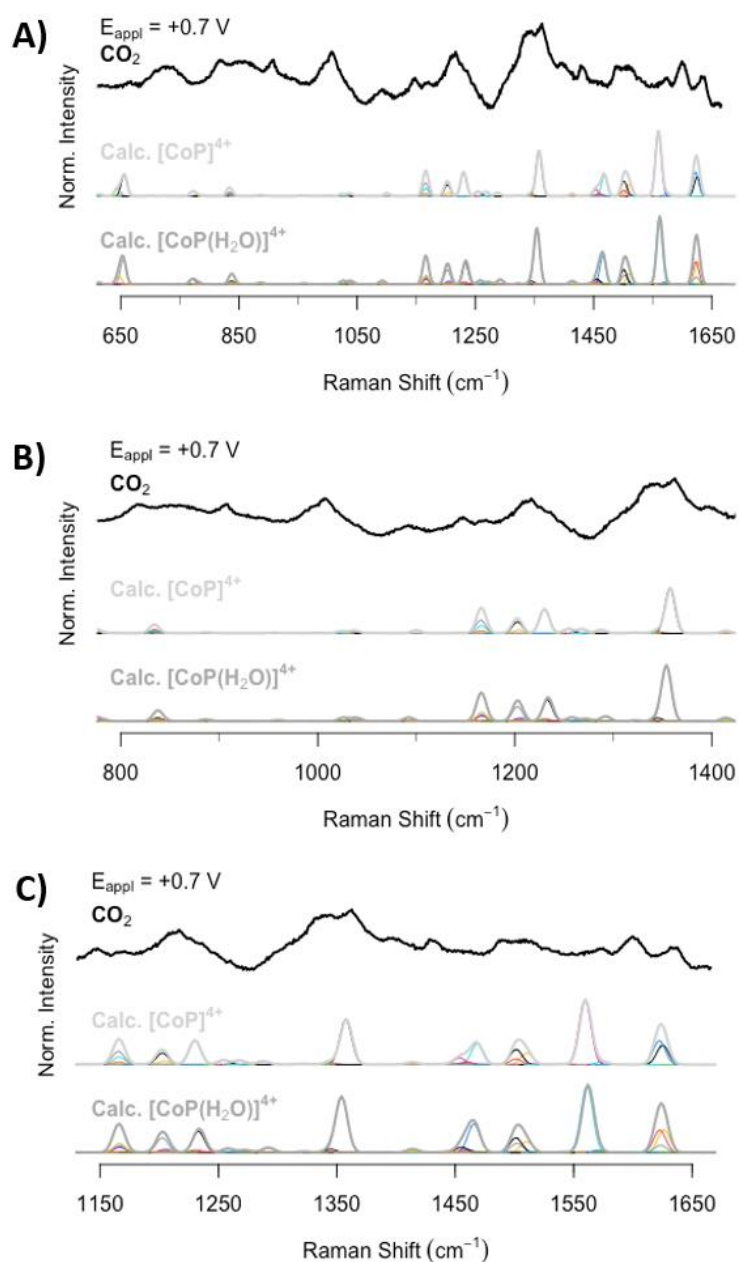

**Figure S45.** Comparison of (A) experimental spectrum at  $+0.7 \text{ V}$  vs SHE and calculated Raman spectra and (B and C) zoom-in of selected calculated Raman frequencies of  $[\text{CoP}]^{4+}$  and  $[\text{CoP}(\text{H}_2\text{O})]^{4+}$ . The experimental Raman spectra corresponds to  $\text{FTO}|\text{CoP}_L$  at  $+0.7 \text{ V}$  vs SHE in  $\text{CO}_2$ -saturated  $0.1 \text{ M NaHCO}_3$ . N.B. for further details see Supplementary Note 7 in section above.

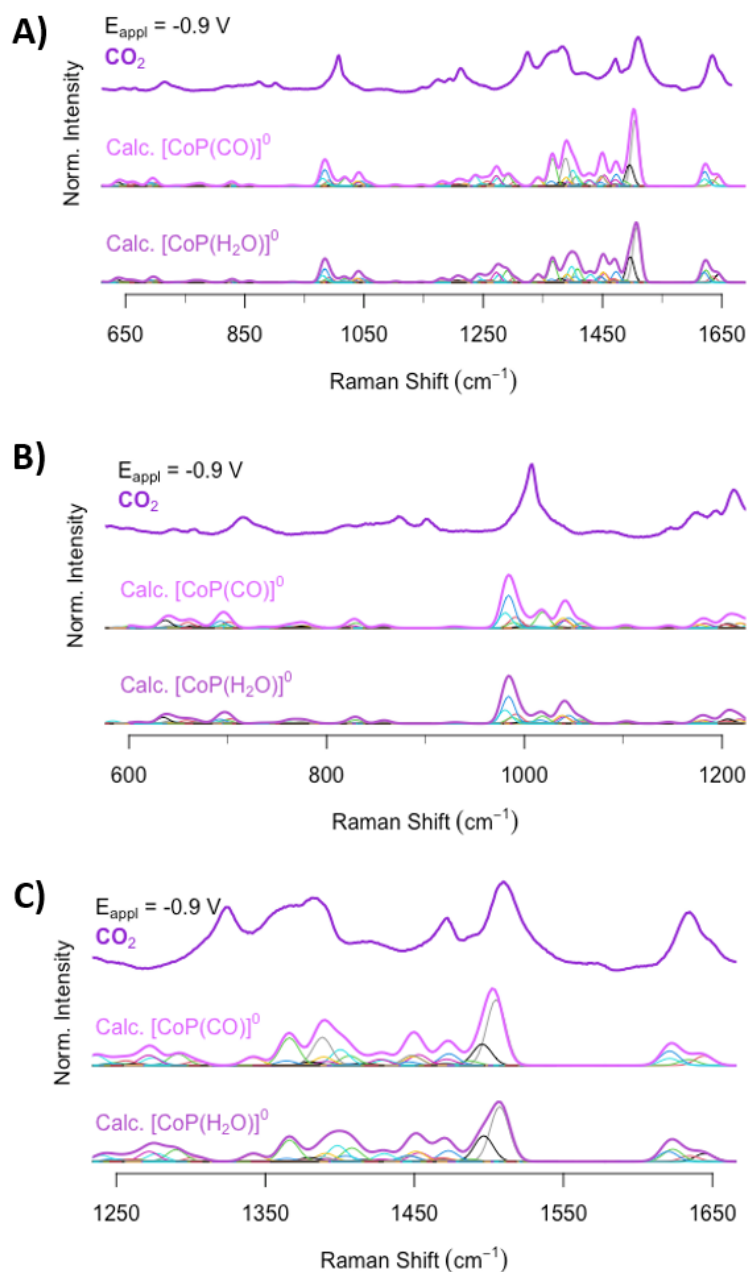

**Figure S46.** Comparison of (A) experimental spectrum at  $-0.9$  V vs SHE and calculated Raman spectra and (B and C) zoom-in of selected calculated Raman frequencies of  $[\text{CoP}(\text{H}_2\text{O})]^0$  and  $[\text{CoP}(\text{CO})]^0$ . The experimental Raman spectra corresponds to  $\text{FTO}|\text{CoP}_L$  at  $-0.9$  V vs SHE in  $\text{CO}_2$ -saturated  $0.1$  M  $\text{NaHCO}_3$ . N.B. for further details see Supplementary Note 7 in section above.

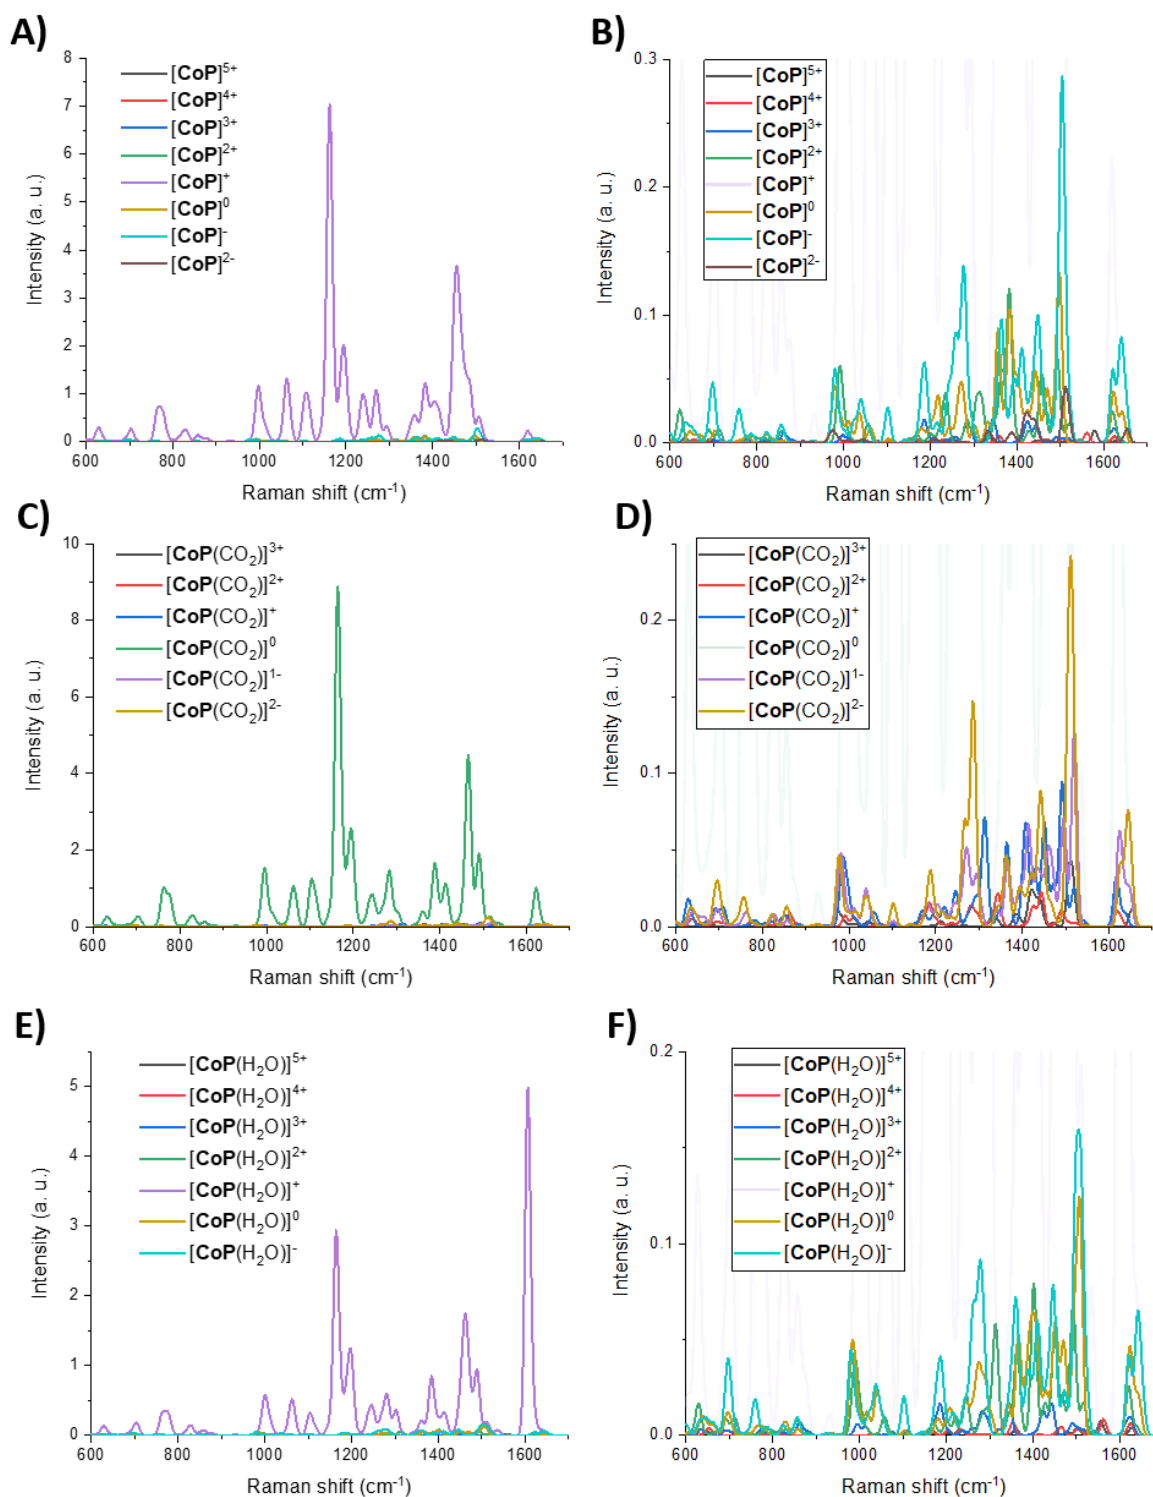

**Figure S47.** Calculated Raman spectra (left column: full intensity range; right column: zoom-in) for different oxidation states of (A and B) adduct-free [CoP]<sup>n</sup>, (C and D) [CoP(CO<sub>2</sub>)]<sup>n</sup> and (E and F) [CoP(H<sub>2</sub>O)]<sup>n</sup>. Oxidation state *n* can range from +5 to -2. In all right columns, to aid visualisation the most intense spectrum is shown 75% more transparent.

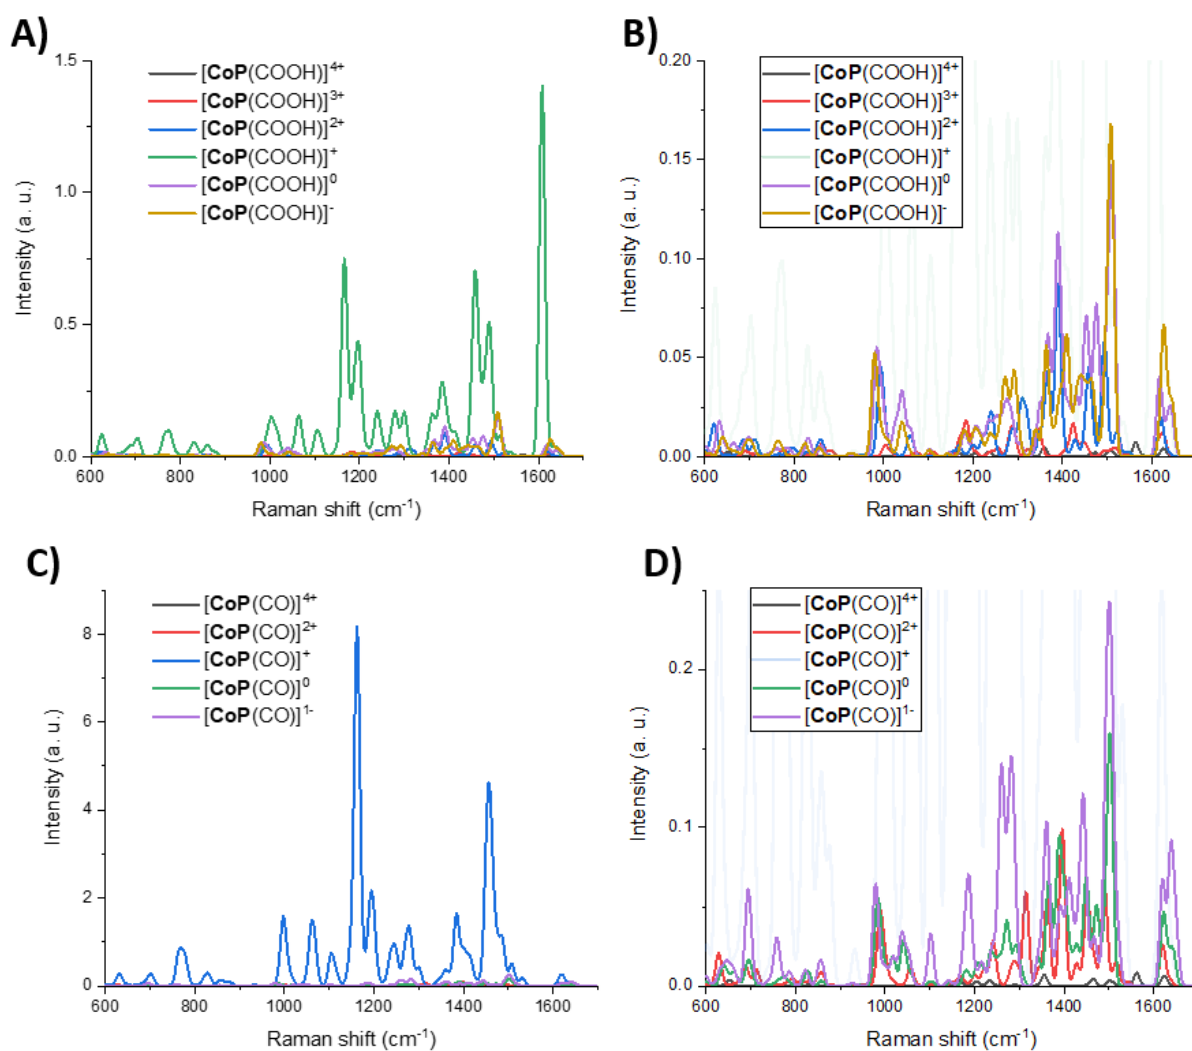

**Figure S48.** Calculated Raman spectra (left column: full intensity range; right column: zoom-in) for different oxidation states of (A and B)  $[\text{CoP}(\text{COOH})]^n$  and (C and D)  $[\text{CoP}(\text{CO})]^n$ . Oxidation state  $n$  can range from +4 to  $-1$ . In all right columns, to aid visualisation the most intense spectrum is shown 75 % more transparent.

Calculated structures of proposed reaction intermediates using model catalyst CoP

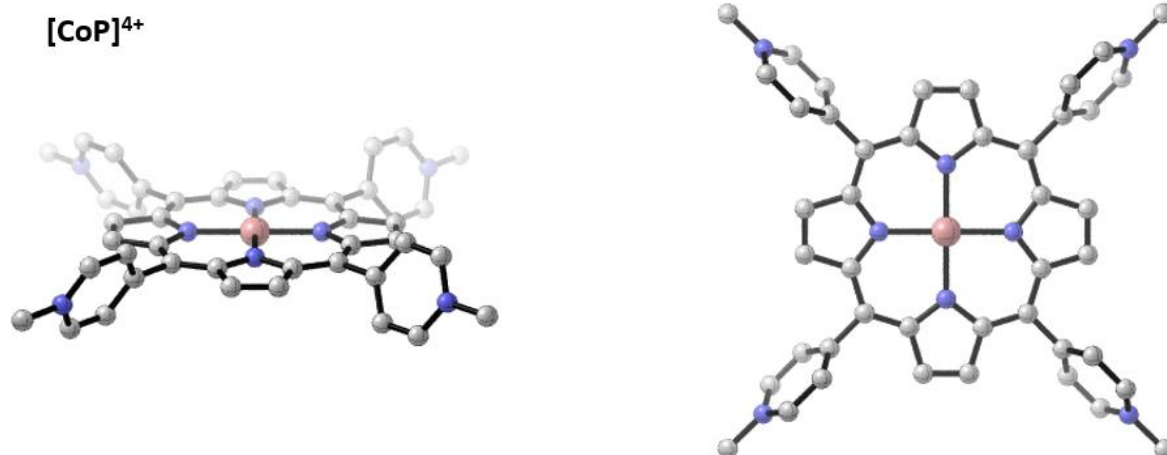

**Figure S49.** Side and top views of calculated structure of [CoP]<sup>4+</sup>.

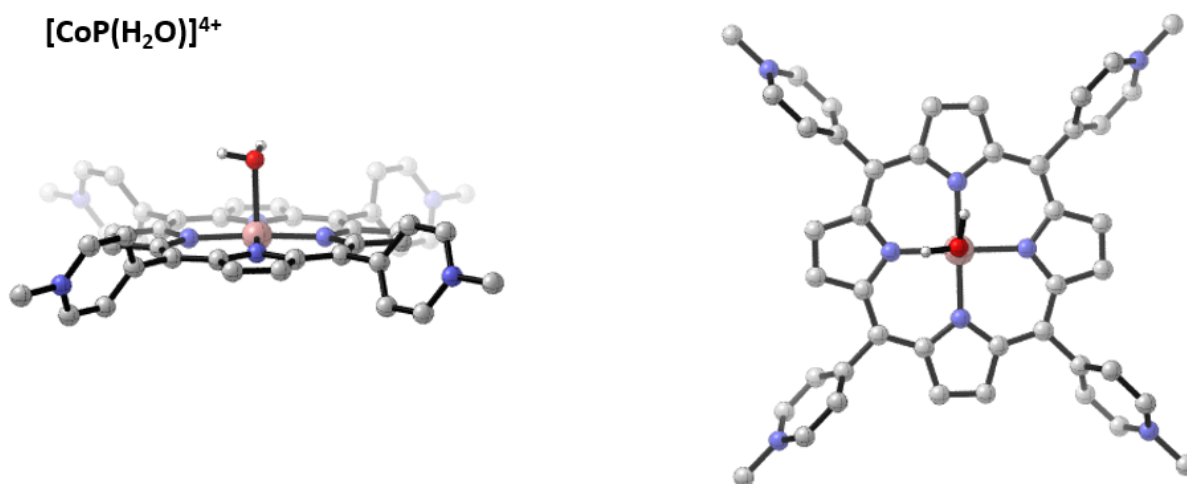

**Figure S50.** Side and top views of calculated structure of [CoP(H<sub>2</sub>O)]<sup>4+</sup>.

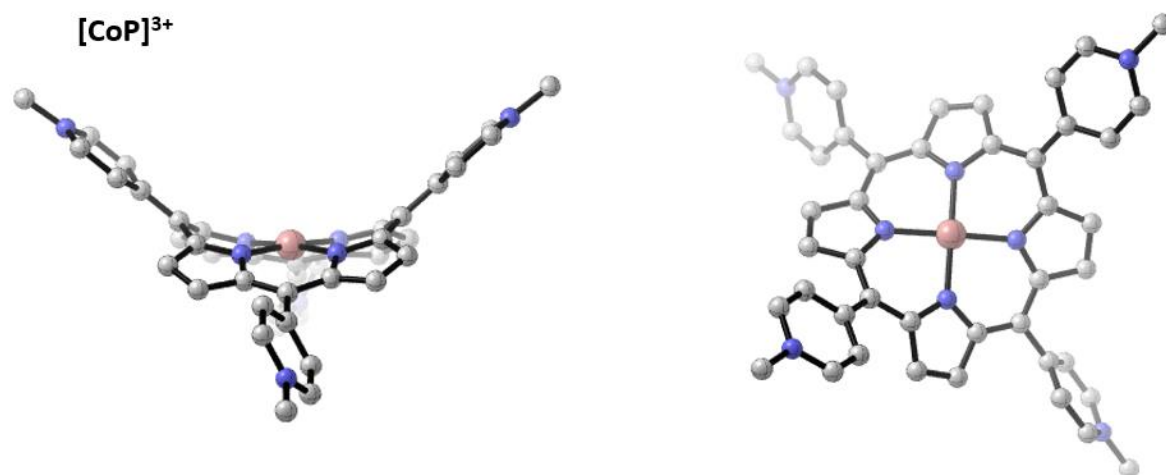

**Figure S51.** Side and top views of calculated structure of **[CoP]<sup>3+</sup>**.

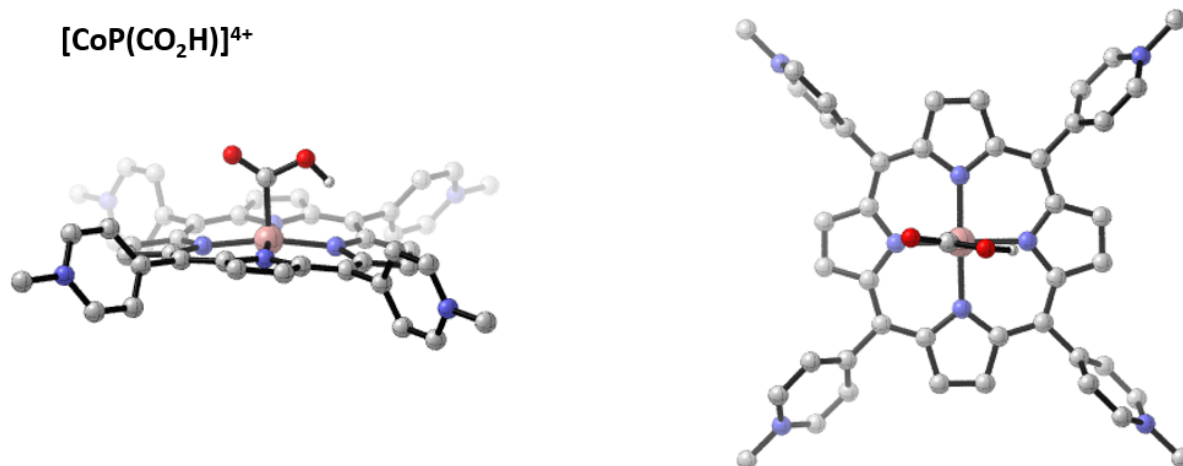

**Figure S52.** Side and top views of calculated structure of **[CoP(CO<sub>2</sub>H)]<sup>4+</sup>**.



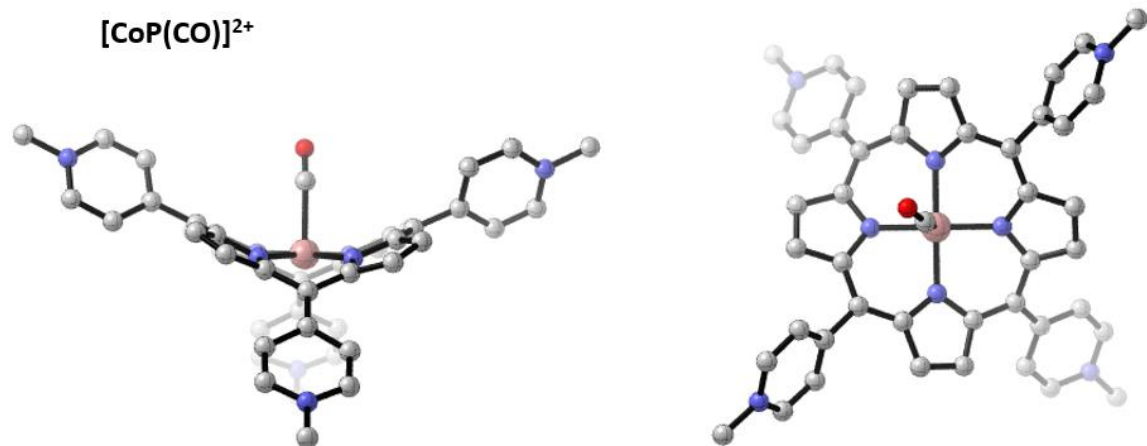

**Figure S53.** Side and top views of calculated structure of  $[\text{CoP}(\text{CO})]^{2+}$ .

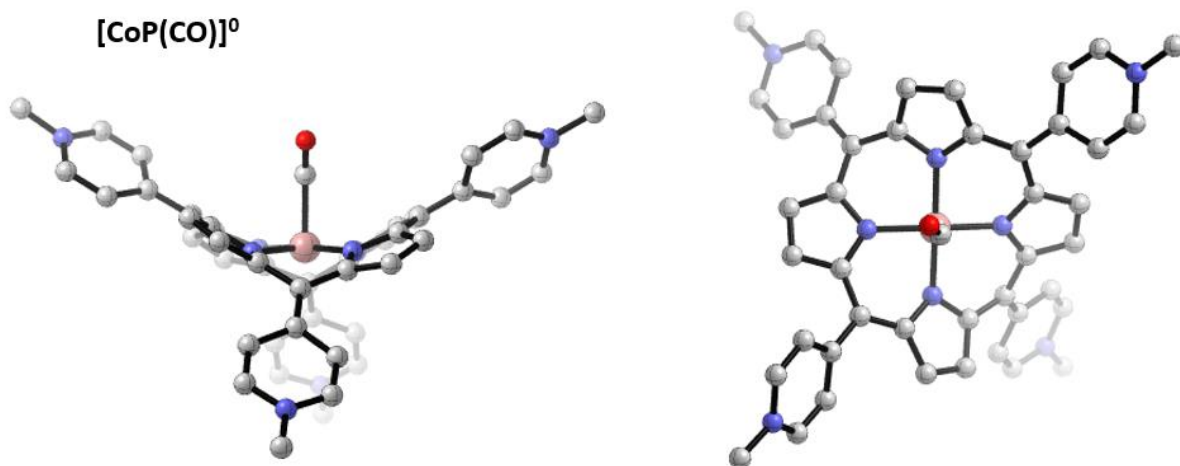

**Figure S54.** Side and top views of calculated structure of  $[\text{CoP}(\text{CO})]^0$ .

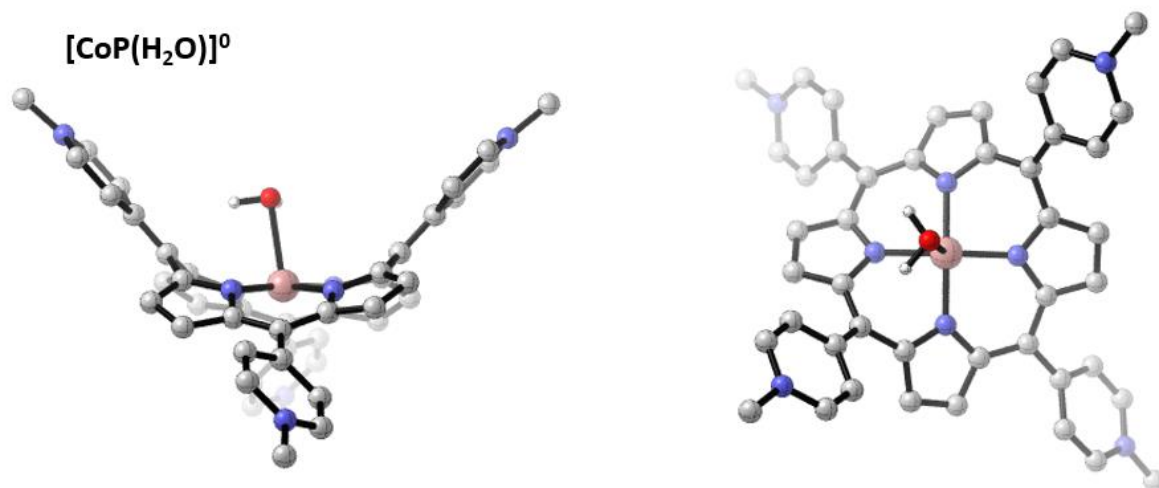

**Figure S55.** Side and top views of calculated structure of  $[\text{CoP}(\text{H}_2\text{O})]^\circ$

## References

1. Sekiya, R.; Tsutsui, Y.; Choi, W.; Sakurai, T.; Seki, S.; Bando, Y.; Maeda, H., Ion-based assemblies of planar anion complexes and cationic Pt<sup>II</sup> complexes. *Chem. Comm.* **2014**, *50*, 10615-10618.
2. Nielsen, P.; Toftlund, H.; Bond, A. D.; Boas, J. F.; Pilbrow, J. R.; Hanson, G. R.; Noble, C.; Riley, M. J.; Neville, S. M.; Moubaraki, B.; Murray, K. S., Systematic study of spin crossover and structure in [Co(terpyRX)<sub>2</sub>](Y)<sub>2</sub> systems (terpyRX = 4'-alkoxy-2,2':6',2''-terpyridine, X = 4, 8, 12, Y = BF<sub>4</sub><sup>-</sup>, ClO<sub>4</sub><sup>-</sup>, PF<sub>6</sub><sup>-</sup>, BPh<sub>4</sub><sup>-</sup>). *Inorg. Chem.* **2009**, *48*, 7033-7047.
3. Elgrishi, N.; Chambers, M. B.; Artero, V.; Fontecave, M., Terpyridine complexes of first row transition metals and electrochemical reduction of CO<sub>2</sub> to CO. *Phys. Chem. Chem. Phys.* **2014**, *16*, 13635-13644.
4. Zhang, X.; Cibian, M.; Call, A.; Yamauchi, K.; Sakai, K., Photochemical CO<sub>2</sub> Reduction Driven by Water-Soluble Copper(I) Photosensitizer with the Catalysis Accelerated by Multi-Electron Chargeable Cobalt Porphyrin. *ACS Catal.* **2019**, *9*, 11263-11273.
5. Klein, D. M.; Rodríguez-Jiménez, S.; Hoefnagel, M. E.; Pannwitz, A.; Prabhakaran, A.; Siegler, M. A.; Keyes, T. E.; Reisner, E.; Brouwer, A. M.; Bonnet, S., Shorter Alkyl Chains Enhance Molecular Diffusion and Electron Transfer Kinetics Between Photosensitisers and Catalysts in CO<sub>2</sub>-Reducing Photocatalytic Liposomes. *Chem. Eur. J.* **2021**, *27*, 17203.
6. Andersson, M.; Hammarstroem, L.; Edwards, K., Effect of Bilayer Phase Transitions on Vesicle Structure, and its Influence on the Kinetics of Viologen Reduction. *J. Phys. Chem.* **1995**, *99*, 14531-14538.
7. Olesund, A.; Gray, V.; Mårtensson, J.; Albinsson, B., Diphenylanthracene Dimers for Triplet-Triplet Annihilation Photon Upconversion: Mechanistic Insights for Intramolecular Pathways and the Importance of Molecular Geometry. *J. Am. Chem. Soc.* **2021**, *143*, 5745-5754.
8. Götz, R.; Ly, H. K.; Wrzolek, P.; Schwalbe, M.; Weidinger, I. M., Surface enhanced resonance Raman spectroscopy of iron Hangman complexes on electrodes during electrocatalytic oxygen reduction: advantages and problems of common drycast methods. *Dalton Trans.* **2017**, *46*, 13220-13228.
9. Marianov, A. N.; Kochubei, A. S.; Roman, T.; Conquest, O. J.; Stampfl, C.; Jiang, Y., Resolving Deactivation Pathways of Co Porphyrin-Based Electrocatalysts for CO<sub>2</sub> Reduction in Aqueous Medium. *ACS Catal.* **2021**, *11*, 3715-3729.
10. Jiang, J.; Matula, A. J.; Swierk, J. R.; Romano, N.; Wu, Y.; Batista, V. S.; Crabtree, R. H.; Lindsey, J. S.; Wang, H.; Brudvig, G. W., Unusual Stability of a Bacteriochlorin Electrocatalyst under Reductive Conditions. A Case Study on CO<sub>2</sub> Conversion to CO. *ACS Catal.* **2018**, *8*, 10131-10136.
11. Terekhov, S. N.; Kruglik, S. G.; Malinovskii, V. L.; Galievsky, V. A.; Chirvony, V. S.; Turpin, P.-Y., Resonance Raman characterization of cationic Co(II) and Co(III) tetrakis(N-methyl-4-pyridinyl)porphyrins in aqueous and non-aqueous media. *J. Raman. Spectrosc.* **2003**, *34*, 868-881.
12. Orendorff, C. J.; Ducey, M. W.; Pemberton, J. E., Quantitative Correlation of Raman Spectral Indicators in Determining Conformational Order in Alkyl Chains. *J. Phys. Chem. A.* **2002**, *106*, 6991-6998.
13. Elgrishi, N.; Chambers, M. B.; Fontecave, M., Turning it off! Disfavouring hydrogen evolution to enhance selectivity for CO production during homogeneous CO<sub>2</sub> reduction by cobalt-terpyridine complexes. *Chem. Sci.* **2015**, *6*, 2522-2531.

14. Kuehnel, M. F.; Orchard, K. L.; Dalle, K. E.; Reisner, E., Selective photocatalytic CO<sub>2</sub> reduction in water through anchoring of a molecular Ni catalyst on CdS nanocrystals. *J. Am. Chem. Soc.* **2017**, *139*, 7217-7223.
15. Araullo-McAdams, C.; Kadish, K. M., Electrochemistry, spectroscopy, and reactivity of (meso-tetrakis(1-methylpyridinium-4-yl)porphinato)cobalt(III,II,I) in nonaqueous media. *Inorg. Chem.* **1990**, *29*, 2749-2757.
16. Han, Y.; Wu, Y.; Lai, W.; Cao, R., Electrocatalytic Water Oxidation by a Water-Soluble Nickel Porphyrin Complex at Neutral pH with Low Overpotential. *Inorg. Chem.* **2015**, *54*, 5604-5613.
17. Pannwitz, A.; Klein, D. M.; Rodríguez-Jiménez, S.; Casadevall, C.; Song, H.; Reisner, E.; Hammarström, L.; Bonnet, S., Roadmap towards solar fuel synthesis at the water interface of liposome membranes. *Chem. Soc. Rev.* **2021**, *50*, 4833-4855.
18. Arcudi, F.; Đorđević, L.; Nagasing, B.; Stupp, S. I.; Weiss, E. A., Quantum Dot-Sensitized Photoreduction of CO<sub>2</sub> in Water with Turnover Number > 80,000. *J. Am. Chem. Soc.* **2021**, *143*, 18131-18138.
19. Chaudhary, Y. S.; Woolerton, T. W.; Allen, C. S.; Warner, J. H.; Pierce, E.; Ragsdale, S. W.; Armstrong, F. A., Visible light-driven CO<sub>2</sub> reduction by enzyme coupled CdS nanocrystals. *Chem. Comm.* **2012**, *48*, 58-60.
20. Zhang, X.; Yamauchi, K.; Sakai, K., Earth-Abundant Photocatalytic CO<sub>2</sub> Reduction by Multielectron Chargeable Cobalt Porphyrin Catalysts: High CO/H<sub>2</sub> Selectivity in Water Based on Phase Mismatch in Frontier MO Association. *ACS Catal.* **2021**, 10436-10449.
21. Call, A.; Cibian, M.; Yamauchi, K.; Sakai, K., Visible-light-driven reduction of CO<sub>2</sub> to CO in fully aqueous media using a water-soluble cobalt porphyrin. *Sustain. Energy Fuels* **2022**.
22. Woolerton, T. W.; Sheard, S.; Reisner, E.; Pierce, E.; Ragsdale, S. W.; Armstrong, F. A., Efficient and clean photoreduction of CO<sub>2</sub> to CO by enzyme-modified TiO<sub>2</sub> nanoparticles using visible light. *J. Am. Chem. Soc.* **2010**, *132*, 2132-2133.
23. Bi, Q.-Q.; Wang, J.-W.; Lv, J.-X.; Wang, J.; Zhang, W.; Lu, T.-B., Selective Photocatalytic CO<sub>2</sub> Reduction in Water by Electrostatic Assembly of CdS Nanocrystals with a Dinuclear Cobalt Catalyst. *ACS Catal.* **2018**, *8*, 11815-11821.
24. Call, A.; Cibian, M.; Yamamoto, K.; Nakazono, T.; Yamauchi, K.; Sakai, K., Highly Efficient and Selective Photocatalytic CO<sub>2</sub> Reduction to CO in Water by a Cobalt Porphyrin Molecular Catalyst. *ACS Catal.* **2019**, *9*, 4867-4874.
25. Sahm, C. D.; Ucoski, G. M.; Roy, S.; Reisner, E., Automated and Continuous-Flow Platform to Analyze Semiconductor–Metal Complex Hybrid Systems for Photocatalytic CO<sub>2</sub> Reduction. *ACS Catal.* **2021**, *11*, 11266-11277.
26. Lian, S.; Kodaimati, M. S.; Weiss, E. A., Photocatalytically Active Superstructures of Quantum Dots and Iron Porphyrins for Reduction of CO<sub>2</sub> to CO in Water. *ACS Nano* **2018**, *12*, 568-575.
27. Wang, Q.; Warnan, J.; Rodríguez-Jiménez, S.; Leung, J. J.; Kalathil, S.; Andrei, V.; Domen, K.; Reisner, E., Molecularly engineered photocatalyst sheet for scalable solar formate production from carbon dioxide and water. *Nat. Energy* **2020**.
28. Kuehnel, M. F.; Sahm, C. D.; Neri, G.; Lee, J. R.; Orchard, Katherine L.; Cowan, A. J.; Reisner, E., ZnSe quantum dots modified with a Ni(cyclam) catalyst for efficient visible-light driven CO<sub>2</sub> reduction in water. *Chem. Sci.* **2018**, *9*, 2501-2509.
29. Ikuta, N.; Takizawa, S.-y.; Murata, S., Photochemical reduction of CO<sub>2</sub> with ascorbate in aqueous solution using vesicles acting as photocatalysts. *Photochem. Photobiol. Sci.* **2014**, *13*, 691-702.

30. Nakada, A.; Koike, K.; Maeda, K.; Ishitani, O., Highly efficient visible-light-driven CO<sub>2</sub> reduction to CO using a Ru(ii)–Re(i) supramolecular photocatalyst in an aqueous solution. *Green Chem.* **2016**, *18*, 139-143.
31. Méndez, M. A.; Voyame, P.; Girault, H. H., Interfacial photoreduction of supercritical CO<sub>2</sub> by an aqueous catalyst. *Angew. Chem. Int. Ed.* **2011**, *50*, 7391-4.
32. Grant, J. L.; Goswami, K.; Spreer, L. O.; Otvos, J. W.; Calvin, M., Photochemical reduction of carbon dioxide to carbon monoxide in water using a nickel(II) tetraazamacrocyclic complex as catalyst. *J. Chem. Soc., Dalton Trans.* **1987**, 2105.
33. Miyamoto, K.; Asahi, R., Water Facilitated Electrochemical Reduction of CO<sub>2</sub> on Cobalt-Porphyrin Catalysts. *J. Phys. Chem. C.* **2019**, *123*, 9944-9948.
34. Kelly, C. P.; Cramer, C. J.; Truhlar, D. G., Aqueous Solvation Free Energies of Ions and Ion–Water Clusters Based on an Accurate Value for the Absolute Aqueous Solvation Free Energy of the Proton. *J. Phys. Chem. B.* **2006**, *110*, 16066-16081.
35. Casanovas, R.; Ortega-Castro, J.; Frau, J.; Donoso, J.; Muñoz, F., Theoretical pKa calculations with continuum model solvents, alternative protocols to thermodynamic cycles. *Int. J. Quantum Chem.* **2014**, *114*, 1350-1363.

End of Supporting Information
